# Supplementary material
Source: publisher site journal article supplement (https://www.dovepress.com/article/398713)
Supplement: Supplementary file 1 [file get_supplementary_file.php]

Supplementary Figure 1

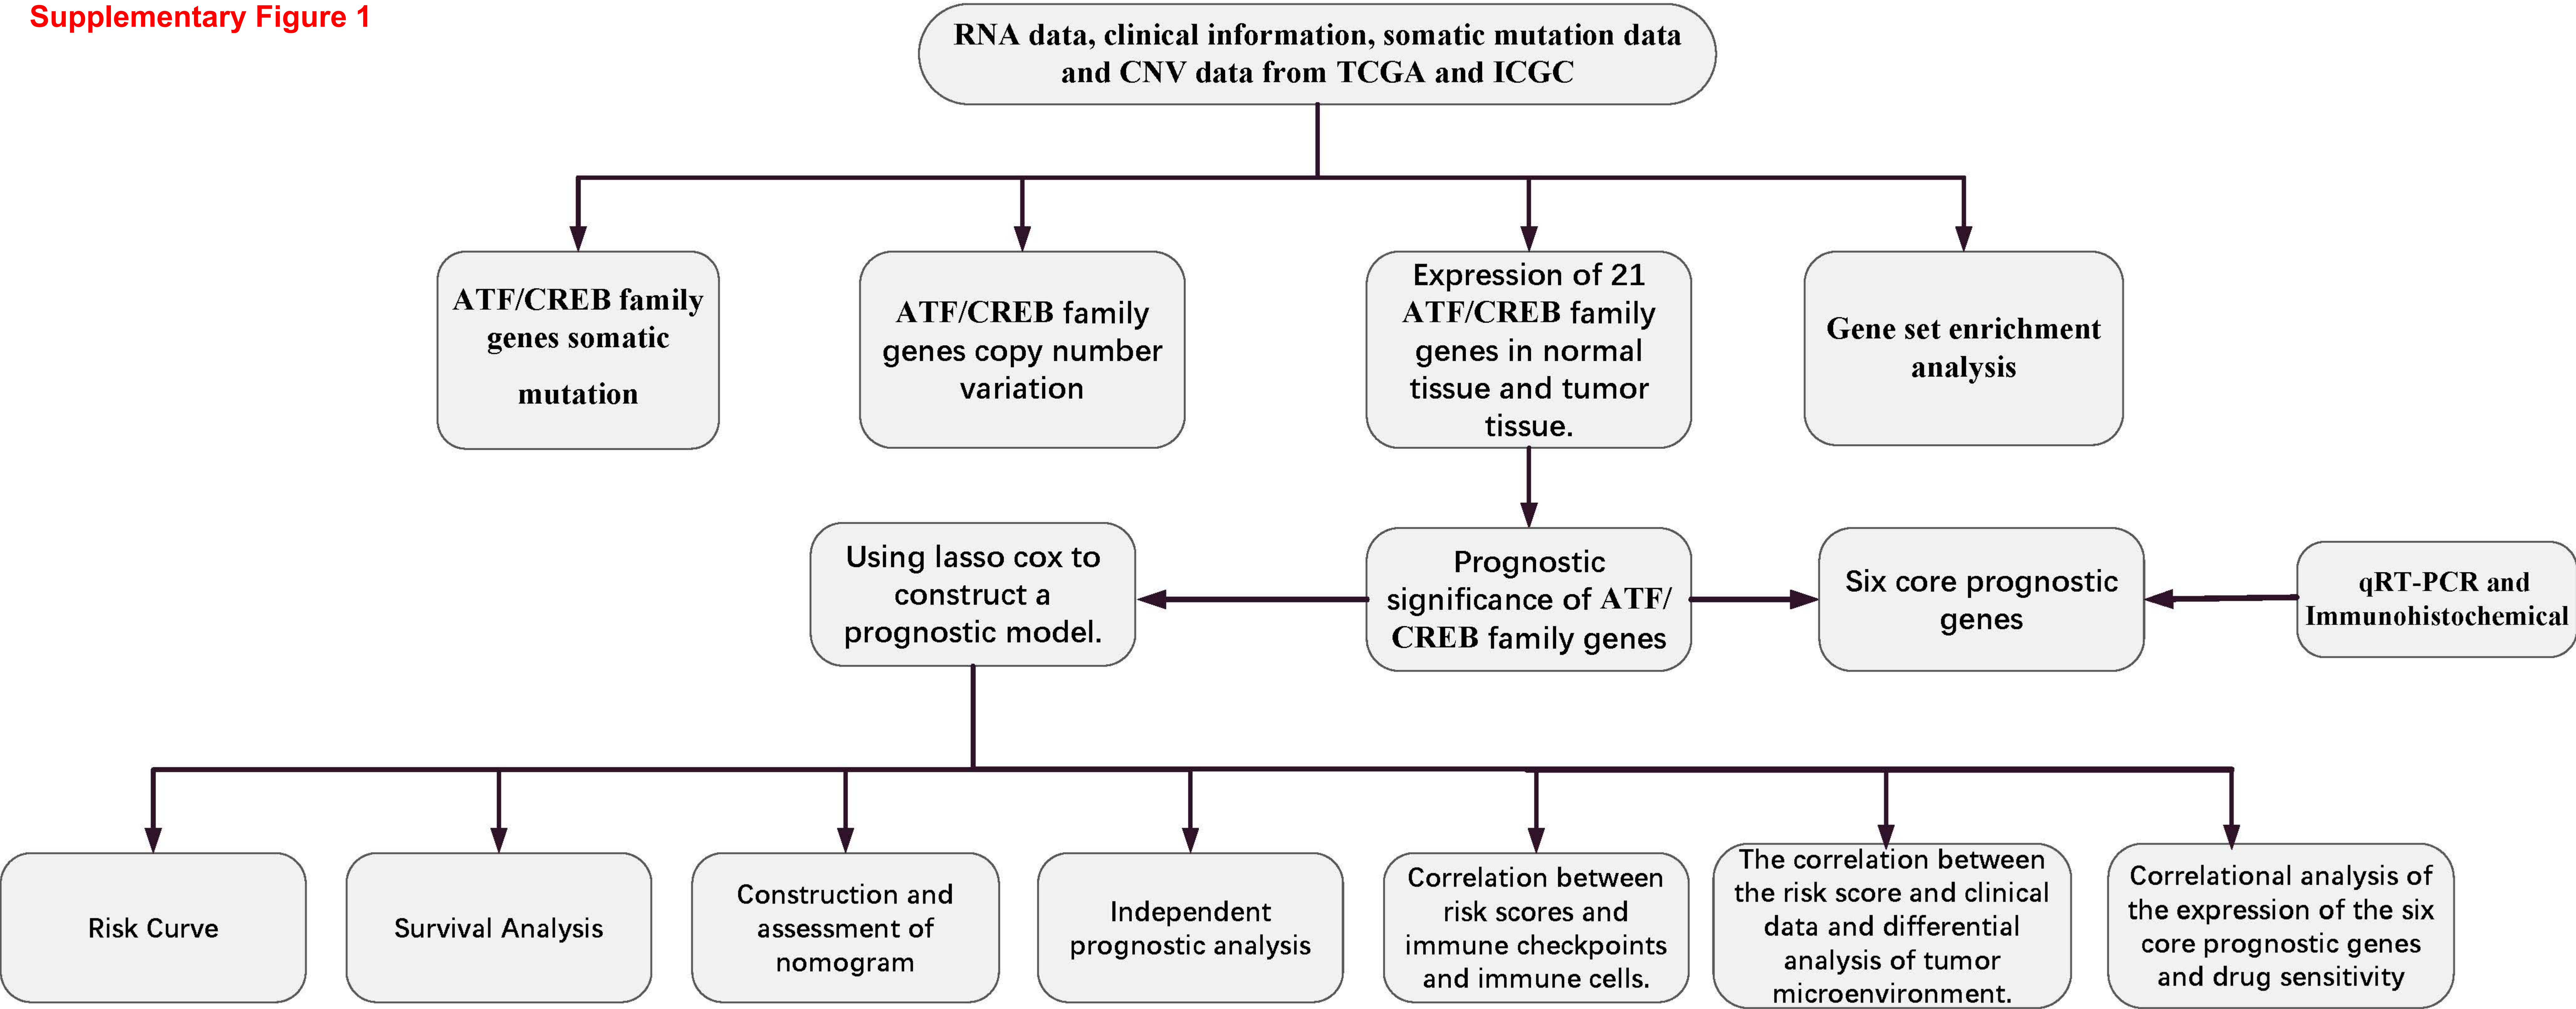

Supplementary Figure 1: Supplementary Figure 1 shows the flow chart of our study design.



**Supplementary Table 1: Supplementary Table 1 shows the risk score table from the TCGA database.**

| id       | futime   | fustat | ATF1     | ATF4     | BATF     | CREB1    | CREB3    | CREB3L1  |
|----------|----------|--------|----------|----------|----------|----------|----------|----------|
| TCGA-DD  | 1.665753 | 0      | 1.66667  | 6.127985 | 2.580213 | 1.151921 | 3.898825 | 0.228809 |
| TCGA-CC- | 0.821918 | 1      | 2.80523  | 6.876709 | 4.667978 | 2.18624  | 4.40843  | 6.380402 |
| TCGA-DD  | 2.235616 | 0      | 2.226848 | 5.614671 | 1.274129 | 1.532103 | 2.983724 | 0.349161 |
| TCGA-G3- | 1.128767 | 0      | 2.901572 | 5.630769 | 2.994865 | 1.426651 | 4.026529 | 1.123561 |
| TCGA-UB- | 2.323288 | 0      | 3.318261 | 7.919102 | 3.799556 | 2.009484 | 4.775465 | 2.94267  |
| TCGA-UB- | 0.586301 | 1      | 2.506939 | 7.511773 | 2.447563 | 1.410332 | 4.951334 | 1.773968 |
| TCGA-BC- | 0.419178 | 1      | 3.252644 | 7.665592 | 2.45995  | 2.246467 | 4.459674 | 1.705897 |
| TCGA-BC- | 2.293151 | 1      | 2.848547 | 6.963305 | 1.374098 | 1.786258 | 3.371044 | 0.18893  |
| TCGA-BC- | 1.49863  | 1      | 1.725331 | 5.583588 | 0.35694  | 1.408108 | 4.086143 | 0.185172 |
| TCGA-FV- | 0.676712 | 1      | 2.738122 | 6.815074 | 1.953469 | 1.739179 | 3.481809 | 0.943682 |
| TCGA-CC- | 0.6      | 0      | 1.664198 | 7.222996 | 1.637706 | 1.449961 | 4.017657 | 0.137839 |
| TCGA-WC  | 0.082192 | 0      | 2.7196   | 8.216275 | 3.502304 | 1.502566 | 4.304141 | 0.997184 |
| TCGA-ED- | 1.112329 | 0      | 2.643614 | 7.386402 | 1.992069 | 1.932945 | 3.683111 | 2.223515 |
| TCGA-DD  | 1.528767 | 1      | 2.510085 | 6.508323 | 4.741424 | 1.621031 | 4.06197  | 0.451682 |
| TCGA-DD  | 0.032877 | 1      | 1.98615  | 6.907857 | 1.222209 | 1.094358 | 4.202189 | 0.54326  |
| TCGA-MR  | 0.90411  | 0      | 2.332024 | 6.999742 | 2.143369 | 1.911298 | 4.230974 | 3.325921 |
| TCGA-QA  | 0.257534 | 0      | 2.5626   | 6.45423  | 0.953205 | 1.804242 | 4.953233 | 0.301285 |
| TCGA-CC- | 0.383562 | 1      | 2.794245 | 7.743308 | 1.633717 | 1.828411 | 4.420602 | 0.377188 |
| TCGA-FV- | 6.810959 | 1      | 1.449406 | 6.806446 | 3.695692 | 1.033285 | 5.438898 | 0.685913 |
| TCGA-DD  | 2.542466 | 0      | 3.127269 | 6.936642 | 1.508788 | 1.812304 | 4.389816 | 0.498797 |
| TCGA-CC- | 0.353425 | 1      | 3.123132 | 7.350757 | 1.320377 | 2.07686  | 3.269593 | 3.591629 |
| TCGA-EP- | 1.632877 | 1      | 2.287505 | 6.558751 | 0.9343   | 1.54668  | 4.357379 | 0.105506 |
| TCGA-G3- | 4.873973 | 0      | 2.315629 | 7.797721 | 2.924218 | 1.443307 | 5.4688   | 2.132106 |
| TCGA-DD  | 1.545205 | 0      | 2.835876 | 6.879616 | 2.490921 | 2.158946 | 4.446716 | 2.119444 |
| TCGA-G3- | 1.60274  | 0      | 3.014873 | 5.901692 | 3.413001 | 1.390424 | 3.575978 | 0.297615 |
| TCGA-DD  | 6.30411  | 0      | 3.210053 | 6.791747 | 0.565003 | 1.588683 | 4.080315 | 0.189136 |
| TCGA-5C- | 0.882192 | 0      | 2.39358  | 6.94805  | 1.189938 | 1.983739 | 4.606059 | 1.407529 |
| TCGA-FV- | 5.073973 | 1      | 2.813286 | 7.386186 | 1.411793 | 2.075549 | 4.230798 | 0.14381  |
| TCGA-DD  | 5.556164 | 0      | 2.096597 | 6.614388 | 1.317801 | 1.47765  | 3.932319 | 0.164258 |
| TCGA-DD  | 1.021918 | 1      | 2.638023 | 6.727988 | 1.922423 | 1.611435 | 4.932119 | 4.808447 |
| TCGA-G3- | 1.424658 | 0      | 2.113402 | 6.157318 | 1.729444 | 1.406596 | 4.108132 | 1.100304 |
| TCGA-MI- | 1.389041 | 0      | 1.973425 | 6.66077  | 1.97817  | 1.277815 | 4.014329 | 0.91287  |
| TCGA-DD  | 4.273973 | 1      | 2.217763 | 5.865508 | 0.570027 | 1.217213 | 3.426553 | 0.543166 |
| TCGA-CC- | 0.282192 | 1      | 2.806868 | 7.849611 | 4.858574 | 1.50797  | 4.465114 | 1.683358 |
| TCGA-2Y- | 2.073973 | 1      | 2.686264 | 7.355773 | 3.46136  | 1.995584 | 4.065825 | 1.499083 |
| TCGA-ES- | 1.2      | 1      | 1.58482  | 6.143285 | 1.412388 | 0.777164 | 4.306688 | 0.733553 |
| TCGA-DD  | 5.520548 | 0      | 2.733956 | 6.711944 | 1.509625 | 1.860826 | 3.250552 | 1.088265 |
| TCGA-G3- | 0.493151 | 0      | 2.12308  | 6.176179 | 3.514335 | 1.240661 | 3.612388 | 1.664183 |
| TCGA-DD  | 6.726027 | 0      | 2.248029 | 7.682604 | 2.461284 | 1.477554 | 5.018967 | 2.122136 |
| TCGA-DD  | 0.468493 | 1      | 2.245392 | 7.684842 | 2.989307 | 1.367584 | 4.224206 | 0.628562 |
| TCGA-DD  | 5.526027 | 0      | 2.15073  | 4.530241 | 0.420713 | 1.470264 | 2.836909 | 0.527007 |
| TCGA-DD  | 1.841096 | 0      | 2.224133 | 7.812504 | 0.9966   | 1.403249 | 3.695395 | 0.0802   |
| TCGA-ED- | 2.243836 | 0      | 2.335355 | 6.185404 | 1.365226 | 1.63598  | 3.448402 | 1.2415   |
| TCGA-HP- | 0.249315 | 1      | 2.519497 | 6.482892 | 2.273671 | 1.669262 | 3.909311 | 1.177674 |
| TCGA-DD  | 6.032877 | 0      | 1.267769 | 7.011612 | 1.292636 | 1.353868 | 3.617114 | 0.060798 |
| TCGA-DD  | 6.150685 | 0      | 1.933623 | 5.940432 | 1.250253 | 1.585633 | 3.647708 | 0.859443 |
| TCGA-BC- | 0.249315 | 1      | 3.176114 | 7.482791 | 4.236382 | 2.046966 | 4.474908 | 4.140478 |
| TCGA-LG- | 1.164384 | 0      | 3.292353 | 7.443821 | 0.852925 | 1.601168 | 4.243998 | 0.820649 |
| TCGA-DD  | 1.813699 | 0      | 2.680553 | 6.308785 | 0.829779 | 1.784955 | 3.180745 | 0.907625 |
| TCGA-DD  | 3.40274  | 0      | 3.154403 | 7.584672 | 2.955095 | 1.998425 | 4.125457 | 0.109477 |
| TCGA-DD  | 5.205479 | 0      | 2.689697 | 6.802305 | 2.778203 | 1.755306 | 3.177923 | 0.407638 |
| TCGA-BC- | 3.70137  | 0      | 3.079295 | 7.076855 | 2.190295 | 1.865233 | 4.594112 | 2.272964 |
| TCGA-DD  | 1.079452 | 1      | 3.091063 | 7.366301 | 1.87065  | 2.15794  | 3.840024 | 0.560153 |
| TCGA-DD  | 1.742466 | 0      | 2.57524  | 6.849555 | 0.447375 | 1.911959 | 3.889394 | 0.201956 |
| TCGA-KR- | 2.482192 | 0      | 2.038675 | 7.952324 | 3.233404 | 1.474306 | 4.954691 | 0.662736 |
| TCGA-ED- | 0.016438 | 0      | 3.369119 | 7.515976 | 3.206958 | 2.145008 | 5.818129 | 1.969386 |
| TCGA-DD  | 2.873973 | 0      | 1.68332  | 6.804962 | 2.841667 | 1.317103 | 3.687007 | 1.669708 |

|          |          |   |          |          |          |          |          |          |
|----------|----------|---|----------|----------|----------|----------|----------|----------|
| TCGA-BW  | 0.054795 | 0 | 2.742318 | 7.253075 | 1.288514 | 1.553137 | 4.076758 | 0.3927   |
| TCGA-DD  | 2.265753 | 1 | 3.041989 | 6.003696 | 0.355543 | 1.78551  | 3.189296 | 0.380377 |
| TCGA-GJ- | 0.183562 | 1 | 2.824897 | 7.136332 | 2.68192  | 1.627732 | 3.994801 | 0.761601 |
| TCGA-DD  | 6.616438 | 0 | 3.212359 | 5.856586 | 2.0312   | 1.788509 | 3.521431 | 0.162805 |
| TCGA-UB- | 0.142466 | 1 | 2.875857 | 6.78647  | 2.658559 | 1.438054 | 4.138863 | 0.832499 |
| TCGA-ES- | 1.884932 | 1 | 1.088402 | 6.864463 | 0.741632 | 1.108778 | 3.489766 | 0.204202 |
| TCGA-G3- | 1.627397 | 0 | 2.356467 | 5.600966 | 5.068348 | 1.10736  | 3.612425 | 0.339576 |
| TCGA-FV- | 0.531507 | 1 | 2.605312 | 7.856924 | 0.957092 | 1.625752 | 4.054759 | 0.101806 |
| TCGA-2Y- | 2.323288 | 1 | 2.333267 | 6.04715  | 0.867394 | 1.5791   | 3.323287 | 0.696759 |
| TCGA-4R- | 0.717808 | 1 | 2.799513 | 7.346624 | 2.330575 | 1.641461 | 4.394566 | 0.339678 |
| TCGA-DD  | 2.19726  | 1 | 2.870523 | 6.292295 | 1.164201 | 1.797016 | 3.859668 | 0.232132 |
| TCGA-RC- | 0.041096 | 0 | 2.083706 | 6.590668 | 0.911587 | 1.297269 | 4.430832 | 3.541526 |
| TCGA-2Y- | 10.06849 | 0 | 2.308479 | 6.160458 | 1.873096 | 1.564881 | 4.690261 | 0.22824  |
| TCGA-DD  | 0.038356 | 1 | 2.736112 | 5.511664 | 0.543486 | 1.775018 | 2.410587 | 0.481843 |
| TCGA-G3- | 2.356164 | 0 | 2.120442 | 6.88339  | 1.835184 | 1.233384 | 3.755791 | 1.151058 |
| TCGA-5R- | 1.424658 | 0 | 2.944999 | 6.762103 | 0.839633 | 1.837696 | 4.079512 | 0.130984 |
| TCGA-ED- | 0.153425 | 1 | 2.590356 | 7.892882 | 1.437298 | 1.785888 | 4.018726 | 2.370661 |
| TCGA-DD  | 3.372603 | 0 | 2.703021 | 6.289188 | 1.092187 | 1.898073 | 3.84578  | 0.061579 |
| TCGA-BC- | 3.89863  | 1 | 2.338466 | 7.51089  | 1.425283 | 1.39793  | 3.741508 | 1.516095 |
| TCGA-DD  | 1.309589 | 0 | 1.916569 | 6.448662 | 1.001796 | 0.82823  | 3.05554  | 0.808556 |
| TCGA-WX  | 1.684932 | 0 | 2.637205 | 7.73921  | 2.013665 | 1.969737 | 4.476377 | 1.477421 |
| TCGA-PD- | 1.750685 | 1 | 2.858758 | 7.355896 | 1.881353 | 1.790565 | 4.523294 | 1.562073 |
| TCGA-YA- | 1.128767 | 1 | 2.88235  | 7.743103 | 6.071345 | 2.164307 | 4.943838 | 1.093153 |
| TCGA-5R- | 1.230137 | 0 | 2.967441 | 6.714441 | 1.428664 | 2.064244 | 4.144753 | 3.380874 |
| TCGA-DD  | 0.534247 | 1 | 2.810907 | 7.711563 | 1.197911 | 1.998331 | 4.98358  | 3.180571 |
| TCGA-CC- | 0.764384 | 1 | 2.581277 | 6.747718 | 1.424528 | 1.965371 | 4.788371 | 1.472139 |
| TCGA-G3- | 1.30411  | 0 | 1.574669 | 6.846532 | 0.876666 | 0.972027 | 4.077043 | 0.190644 |
| TCGA-DD  | 2.090411 | 0 | 2.780827 | 8.04682  | 1.215249 | 1.563387 | 2.920588 | 0.627305 |
| TCGA-DD  | 2.972603 | 0 | 1.926487 | 7.196439 | 2.483522 | 1.424217 | 3.937031 | 0.216037 |
| TCGA-DD  | 2.463014 | 1 | 2.479602 | 7.054999 | 0.462661 | 1.963683 | 4.731367 | 1.240252 |
| TCGA-DD  | 4.194521 | 0 | 2.223146 | 6.137106 | 0.990769 | 1.304179 | 3.829865 | 0.120847 |
| TCGA-UB- | 0.860274 | 0 | 2.464948 | 6.899525 | 2.212114 | 1.719151 | 3.546841 | 0.638035 |
| TCGA-DD  | 1.241096 | 0 | 1.719581 | 7.803315 | 3.075334 | 1.254365 | 4.693517 | 0.299386 |
| TCGA-DD  | 5.39726  | 0 | 2.472777 | 7.058282 | 0.90411  | 1.440361 | 3.297906 | 0.23544  |
| TCGA-FV- | 1.00274  | 1 | 2.704261 | 6.842472 | 3.62955  | 1.807172 | 4.121738 | 4.124931 |
| TCGA-DD  | 6.728767 | 1 | 3.101833 | 6.818327 | 2.352681 | 2.038533 | 4.124751 | 2.349708 |
| TCGA-MI- | 2.046575 | 0 | 2.753533 | 6.760323 | 2.534624 | 1.355727 | 3.696865 | 0.424438 |
| TCGA-UB- | 1.369863 | 0 | 3.103185 | 6.808189 | 0.541342 | 2.039055 | 3.965543 | 0.285039 |
| TCGA-FV- | 0.032877 | 0 | 3.010369 | 7.036737 | 3.302797 | 2.068345 | 4.084557 | 0.115605 |
| TCGA-DD  | 1.969863 | 0 | 2.454067 | 6.981882 | 0.36466  | 1.290456 | 4.148004 | 2.770009 |
| TCGA-DD  | 3.684932 | 0 | 2.735471 | 7.854353 | 2.185565 | 1.257473 | 4.439512 | 2.560081 |
| TCGA-K7- | 1.421918 | 0 | 2.513816 | 5.954605 | 3.781381 | 2.042997 | 4.038482 | 0.400882 |
| TCGA-XR- | 2.821918 | 0 | 2.693436 | 6.002885 | 2.814149 | 1.571441 | 4.084366 | 1.696602 |
| TCGA-DD  | 3.972603 | 0 | 2.359272 | 7.012953 | 0.543907 | 1.253468 | 4.368758 | 2.187475 |
| TCGA-KR- | 2.605479 | 0 | 2.006936 | 7.784626 | 4.301482 | 1.240334 | 4.533028 | 0.426401 |
| TCGA-G3- | 1.238356 | 1 | 3.278337 | 7.575466 | 2.665213 | 1.846486 | 4.972187 | 2.690468 |
| TCGA-K7- | 0.983562 | 0 | 3.365641 | 6.909097 | 1.905498 | 2.232457 | 4.497779 | 2.60952  |
| TCGA-BC- | 0.021918 | 0 | 2.297952 | 7.130464 | 0.68989  | 1.299467 | 4.139829 | 0.209866 |
| TCGA-BC- | 0.093151 | 1 | 3.077932 | 7.132008 | 0.252661 | 1.618481 | 4.048264 | 0.099138 |
| TCGA-UB- | 0.89589  | 0 | 2.932579 | 6.54441  | 1.234658 | 2.010665 | 3.668952 | 1.395841 |
| TCGA-DD  | 2.219178 | 0 | 2.612938 | 5.953823 | 0.963782 | 1.359286 | 3.53476  | 0.274586 |
| TCGA-ZP- | 2.989041 | 0 | 2.81235  | 6.157348 | 1.474807 | 1.471647 | 3.105003 | 1.440491 |
| TCGA-DD  | 3.758904 | 1 | 2.416901 | 7.218104 | 3.05399  | 1.67792  | 4.239315 | 1.020328 |
| TCGA-CC- | 0.761644 | 1 | 2.010231 | 7.194972 | 5.951049 | 1.207173 | 3.265663 | 0.139505 |
| TCGA-RC  | TCGA-    | 0 | 1.971787 | 5.721139 | 0.652238 | 1.312522 | 3.636398 | 0.108063 |
| 0.09863  | TCGA-DD  | 0 | 2.758538 | 6.719274 | 1.322797 | 1.839474 | 3.948137 | 1.476089 |
| 1.747945 |          | 1 | 2.923347 | 7.182799 | 3.969142 | 1.63711  | 3.860653 | 0.212669 |
|          |          | 0 | 2.495834 | 6.385861 | 1.493039 | 1.289737 | 3.845227 | 0.411733 |

Supplementary table 1

|          |          |   |          |          |          |          |          |          |
|----------|----------|---|----------|----------|----------|----------|----------|----------|
| TCGA-DD  | 0.315068 | 1 | 2.13562  | 7.277544 | 2.728679 | 1.170837 | 4.56736  | 0.102615 |
| TCGA-DD  | 3.90137  | 0 | 2.550937 | 6.431283 | 0.917937 | 1.720364 | 3.995324 | 0.162203 |
| TCGA-MI- | 1.726027 | 0 | 2.357615 | 7.045745 | 1.556924 | 1.708315 | 3.798144 | 0.592604 |
| TCGA-FV- | 2.323288 | 0 | 2.862584 | 7.9286   | 0.618467 | 1.68164  | 5.389446 | 1.472369 |
| TCGA-2Y- | 3.367123 | 1 | 1.609754 | 7.236862 | 2.320938 | 0.885622 | 3.719272 | 0.154812 |
| TCGA-CC- | 0.942466 | 1 | 3.243427 | 6.817748 | 0.460577 | 1.73166  | 3.43961  | 1.003027 |
| TCGA-DD  | 1.80274  | 0 | 1.93979  | 6.797826 | 1.366064 | 1.341951 | 3.970102 | 2.02346  |
| TCGA-BC- | 0.843836 | 1 | 2.65016  | 7.108272 | 0.601451 | 1.704824 | 3.411238 | 1.578924 |
| TCGA-G3- | 1.70137  | 0 | 2.898759 | 7.108417 | 0.847721 | 1.465662 | 3.183439 | 0.267227 |
| TCGA-CC- | 0.276712 | 1 | 3.204177 | 7.16434  | 3.641142 | 2.381901 | 4.837998 | 2.193763 |
| TCGA-2Y- | 6.936986 | 1 | 2.53463  | 6.539257 | 1.593618 | 1.773584 | 3.1964   | 0.407583 |
| TCGA-ED- | 1.169863 | 0 | 2.190111 | 6.254928 | 1.463032 | 1.277609 | 3.967021 | 0.837441 |
| TCGA-CC- | 0.950685 | 1 | 2.235516 | 8.064841 | 2.279125 | 1.579962 | 4.192266 | 0.921541 |
| TCGA-DD  | 7.473973 | 0 | 2.414337 | 6.915795 | 3.472239 | 1.610201 | 4.203564 | 0.729092 |
| TCGA-BD- | 1.120548 | 0 | 2.449094 | 6.574811 | 3.090652 | 1.830004 | 4.449747 | 1.182259 |
| TCGA-DD  | 1.761644 | 1 | 2.138705 | 7.032793 | 6.197438 | 1.328956 | 4.158405 | 0.211164 |
| TCGA-DD  | 0.638356 | 1 | 2.267176 | 7.784074 | 1.39053  | 1.216629 | 4.535276 | 0.074422 |
| TCGA-DD  | 0.024658 | 1 | 2.549908 | 7.437673 | 3.187141 | 1.727594 | 4.426074 | 2.473746 |
| TCGA-DD  | 0.950685 | 0 | 1.593974 | 6.74117  | 1.75056  | 1.087219 | 4.053766 | 1.033174 |
| TCGA-CC- | 0.684932 | 0 | 1.813709 | 6.89979  | 5.18542  | 1.024075 | 3.467112 | 2.099705 |
| TCGA-DD  | 1.164384 | 1 | 3.105231 | 7.400266 | 1.650472 | 2.161996 | 3.491616 | 0.539004 |
| TCGA-ZS- | 6.608219 | 0 | 3.101991 | 6.204052 | 1.008773 | 2.063832 | 3.987272 | 0.224771 |
| TCGA-NI- | 2.189041 | 0 | 2.627124 | 6.376392 | 1.261019 | 1.214744 | 3.405941 | 1.3941   |
| TCGA-DD  | 1.646575 | 1 | 2.142792 | 7.165483 | 0.788647 | 1.128858 | 4.377653 | 0.157933 |
| TCGA-G3- | 1.224658 | 0 | 1.674746 | 6.039673 | 0.877082 | 1.44124  | 3.325259 | 0.101207 |
| TCGA-MI- | 1.912329 | 0 | 2.309639 | 6.201263 | 0.50025  | 1.355801 | 3.775545 | 0.399604 |
| TCGA-CC- | 0.717808 | 1 | 3.717002 | 5.596953 | 0.879083 | 2.075364 | 3.702731 | 0.078872 |
| TCGA-G3- | 1.912329 | 0 | 3.07841  | 7.24434  | 2.290129 | 1.942127 | 4.361654 | 0.673952 |
| TCGA-ZS- | 3.4      | 0 | 2.234546 | 6.174406 | 0.232958 | 1.173161 | 3.615283 | 0.281412 |
| TCGA-DD  | 0.775342 | 1 | 2.755037 | 5.75228  | 0.395874 | 1.3923   | 4.060242 | 0.190326 |
| TCGA-RC- | 1.610959 | 0 | 2.501529 | 5.466684 | 3.542149 | 1.324795 | 3.08948  | 0.479472 |
| TCGA-DD  | 2.460274 | 0 | 1.620558 | 7.947931 | 3.902208 | 0.945156 | 3.909379 | 0.079136 |
| TCGA-CC- | 0.745205 | 1 | 2.981739 | 7.115293 | 1.301436 | 1.878982 | 3.760733 | 0.745085 |
| TCGA-DD  | 0.468493 | 1 | 2.884438 | 7.741999 | 2.552489 | 2.136228 | 4.191292 | 3.413709 |
| TCGA-DD  | 1.465753 | 1 | 1.852997 | 7.275497 | 0.874171 | 0.891179 | 3.813184 | 0.640961 |
| TCGA-2Y- | 1.734247 | 1 | 2.684654 | 6.338601 | 2.252524 | 1.617651 | 3.71823  | 0.94385  |
| TCGA-DD  | 2.923288 | 0 | 2.681764 | 6.447091 | 2.139246 | 1.775303 | 3.651532 | 0.624725 |
| TCGA-DD  | 7.523288 | 0 | 2.625165 | 6.683606 | 2.002768 | 2.089244 | 3.856451 | 2.434699 |
| TCGA-2Y- | 3.2      | 0 | 2.447258 | 7.084452 | 1.131405 | 1.592713 | 3.83221  | 0.070257 |
| TCGA-RC- | 1.753425 | 0 | 2.518539 | 7.154175 | 1.899578 | 1.261382 | 4.191018 | 1.499803 |
| TCGA-G3- | 1.139726 | 1 | 2.448003 | 7.657255 | 3.759626 | 1.574159 | 4.259693 | 0.096037 |
| TCGA-BC- | 3.827397 | 1 | 2.99411  | 6.874008 | 1.940442 | 2.038583 | 5.287468 | 0.367079 |
| TCGA-DD  | 5.082192 | 0 | 2.27265  | 5.835614 | 0.595384 | 1.777417 | 3.354203 | 0.151305 |
| TCGA-2Y- | 0.978082 | 0 | 2.527513 | 6.86105  | 1.561854 | 1.567138 | 3.620375 | 1.318116 |
| TCGA-2Y- | 3.482192 | 1 | 2.394727 | 6.519538 | 2.624031 | 1.568756 | 3.61686  | 0.736073 |
| TCGA-DD  | 1.89863  | 0 | 3.172479 | 7.30572  | 0.549149 | 1.689944 | 3.292062 | 0.226145 |
| TCGA-DD  | 6.964384 | 1 | 2.312878 | 5.681541 | 1.301891 | 1.351268 | 4.012455 | 0.904101 |
| TCGA-XR- | 1.89863  | 1 | 2.681189 | 6.931586 | 0.803576 | 1.672544 | 3.228354 | 0.321363 |
| TCGA-DD  | 1.517808 | 0 | 1.98478  | 7.712053 | 1.776365 | 1.152931 | 3.165032 | 0.107268 |
| TCGA-DD  | 1.512329 | 0 | 2.364777 | 6.72573  | 1.005801 | 1.509286 | 3.561549 | 0.178846 |
| TCGA-2Y- | 0.712329 | 0 | 2.409337 | 6.394032 | 2.279636 | 1.359314 | 3.721155 | 0.645238 |
| TCGA-BD- | 3.734247 | 0 | 2.250606 | 6.652423 | 1.840336 | 1.532884 | 4.045285 | 0.240065 |
| TCGA-DD  | 2.550685 | 1 | 2.116805 | 6.703648 | 2.354463 | 1.690691 | 4.329311 | 1.368754 |
| TCGA-KR- | 2.271233 | 0 | 2.096607 | 6.5444   | 1.761805 | 1.335576 | 4.824354 | 0.799321 |
| TCGA-ED- | 0.810959 | 1 | 3.162154 | 6.67251  | 0.285008 | 2.002353 | 4.381981 | 0.449518 |
| TCGA-DD  | 1.550685 | 0 | 1.726086 | 6.134934 | 0.779867 | 1.238163 | 3.230977 | 0.249567 |
| TCGA-G3- | 0.178082 | 1 | 3.022805 | 7.782264 | 2.086824 | 2.009242 | 5.347101 | 0.698734 |
| TCGA-ED- | 0.016438 | 0 | 3.326509 | 6.976131 | 3.176133 | 2.679175 | 4.338561 | 5.542564 |

Supplementary table 1

|          |          |   |          |          |          |          |          |          |
|----------|----------|---|----------|----------|----------|----------|----------|----------|
| TCGA-DD  | 6.347945 | 0 | 2.956237 | 6.600933 | 3.272173 | 2.145375 | 3.247277 | 1.489025 |
| TCGA-EP- | 0.994521 | 0 | 2.866975 | 7.110421 | 4.040758 | 1.587474 | 4.797135 | 0.514066 |
| TCGA-FV- | 0.027397 | 0 | 2.122546 | 6.190586 | 0.359503 | 1.537645 | 3.690804 | 0.157999 |
| TCGA-CC- | 0.863014 | 1 | 2.812852 | 7.976346 | 0.885698 | 1.971459 | 4.415031 | 0.822224 |
| TCGA-CC- | 1.778082 | 1 | 2.046392 | 6.941422 | 0.676732 | 1.404793 | 3.602107 | 0.626254 |
| TCGA-ZS- | 3.79726  | 1 | 2.295464 | 7.284551 | 1.727687 | 1.322704 | 4.337995 | 0.931713 |
| TCGA-G3- | 1.731507 | 0 | 3.101126 | 7.591542 | 2.928659 | 2.285813 | 4.695143 | 0.787833 |
| TCGA-DD  | 6.30411  | 0 | 2.709323 | 6.241619 | 3.190307 | 1.37689  | 3.392897 | 0.28027  |
| TCGA-EP- | 1.561644 | 0 | 3.483132 | 6.17044  | 0.469984 | 1.703137 | 3.438265 | 0.301479 |
| TCGA-DD  | 2.753425 | 1 | 3.06441  | 7.861236 | 1.661711 | 1.989829 | 4.409848 | 0.182155 |
| TCGA-G3- | 1.019178 | 0 | 2.723613 | 6.027421 | 1.364164 | 1.347515 | 3.711633 | 0.15904  |
| TCGA-DD  | 1.520548 | 0 | 3.186904 | 6.89817  | 0.249276 | 1.691443 | 4.390778 | 1.27828  |
| TCGA-CC- | 0.353425 | 1 | 3.684863 | 6.840306 | 1.351469 | 2.644587 | 4.259235 | 4.943169 |
| TCGA-DD  | 1.254795 | 0 | 2.769752 | 7.062273 | 2.399949 | 1.903648 | 3.975965 | 0.571375 |
| TCGA-BC- | 1.060274 | 0 | 2.478541 | 6.470252 | 4.809362 | 1.052478 | 4.012495 | 0.63168  |
| TCGA-5C- | 0.89863  | 0 | 3.227276 | 7.492456 | 1.253644 | 1.591144 | 4.143657 | 1.323876 |
| TCGA-DD  | 0.956164 | 1 | 2.98162  | 6.489478 | 3.60162  | 1.804419 | 3.949746 | 0.345085 |
| TCGA-BC- | 5.79726  | 1 | 2.359219 | 7.25632  | 2.4966   | 1.292794 | 4.058705 | 1.275728 |
| TCGA-GJ- | 2.408219 | 0 | 2.725758 | 6.999694 | 4.032541 | 2.156778 | 4.400309 | 1.520386 |
| TCGA-G3- | 4.482192 | 0 | 2.577242 | 7.105437 | 0.414032 | 1.848843 | 4.05859  | 0.133788 |
| TCGA-DD  | 4.687671 | 0 | 2.035153 | 5.919978 | 3.214436 | 1.23251  | 3.128473 | 0.782576 |
| TCGA-BC- | 3.109589 | 1 | 2.708333 | 6.657884 | 0.779148 | 2.281907 | 5.222344 | 1.156206 |
| TCGA-2Y- | 5.312329 | 0 | 2.530023 | 6.677696 | 0.604837 | 1.433529 | 3.51307  | 0.500666 |
| TCGA-ZP- | 2.980822 | 1 | 2.700869 | 6.815382 | 0.916403 | 1.573654 | 4.465763 | 0.891818 |
| TCGA-DD  | 6.643836 | 0 | 2.95765  | 6.296956 | 1.623756 | 1.245243 | 3.937608 | 2.860382 |
| TCGA-2Y- | 4.449315 | 1 | 2.404391 | 6.006321 | 2.056424 | 1.631862 | 3.485745 | 0.464163 |
| TCGA-CC- | 0.994521 | 0 | 2.352207 | 7.645735 | 2.031201 | 1.33928  | 4.139124 | 3.814337 |
| TCGA-DD  | 1.994521 | 0 | 2.67115  | 6.883765 | 1.518486 | 1.456141 | 3.776874 | 0.16239  |
| TCGA-DD  | 3.136986 | 0 | 2.555197 | 6.334425 | 0.333944 | 1.264921 | 3.351589 | 0.251149 |
| TCGA-FV- | 1.591781 | 1 | 2.716425 | 7.040071 | 4.163484 | 1.649657 | 4.320179 | 0.594421 |
| TCGA-G3- | 0.989041 | 0 | 3.529311 | 7.723019 | 1.553475 | 1.840901 | 5.049569 | 3.777841 |
| TCGA-2Y- | 3.978082 | 0 | 2.451178 | 6.394985 | 0.916872 | 1.211885 | 4.193186 | 0.21431  |
| TCGA-3K- | 1.084932 | 0 | 2.029748 | 6.803945 | 1.179137 | 1.451271 | 3.906291 | 0.178237 |
| TCGA-CC- | 0.265753 | 1 | 3.217126 | 7.89296  | 2.425435 | 2.647223 | 4.381222 | 1.996885 |
| TCGA-ZP- | 2.09589  | 1 | 3.258641 | 7.611954 | 2.665118 | 2.13152  | 4.508126 | 0.875124 |
| TCGA-2Y- | 1.520548 | 1 | 2.824286 | 6.770179 | 1.224086 | 2.073917 | 4.038503 | 1.270065 |
| TCGA-G3- | 4.254795 | 0 | 2.881125 | 7.099811 | 1.45096  | 1.744815 | 5.115054 | 1.574481 |
| TCGA-DD  | 1.575342 | 0 | 1.942532 | 7.064327 | 1.76159  | 1.382574 | 4.292489 | 0.452441 |
| TCGA-RG- | 3.008219 | 0 | 2.58126  | 6.92175  | 3.202802 | 1.698715 | 3.99354  | 0.264545 |
| TCGA-DD  | 1.043836 | 1 | 1.856875 | 7.073244 | 1.356813 | 0.973634 | 4.096967 | 1.099777 |
| TCGA-DD  | 3.339726 | 0 | 2.092427 | 7.614748 | 0.559539 | 1.893979 | 4.136007 | 1.06554  |
| TCGA-5R- | 0.126027 | 1 | 2.377645 | 7.022407 | 2.698497 | 1.503194 | 3.998152 | 1.51688  |
| TCGA-EP- | 0.830137 | 0 | 2.086659 | 7.008904 | 2.553622 | 1.244177 | 3.915549 | 0.704098 |
| TCGA-DD  | 9.528767 | 0 | 1.181938 | 7.997488 | 1.939127 | 0.806587 | 5.155265 | 0.500528 |
| TCGA-G3- | 0.073973 | 1 | 3.073028 | 6.240168 | 0.542243 | 1.624445 | 3.913671 | 0.425528 |
| TCGA-ED- | 2.493151 | 0 | 2.817244 | 6.817693 | 1.37588  | 1.563877 | 5.05246  | 0.419682 |
| TCGA-DD  | 1.920548 | 0 | 2.707987 | 6.273916 | 0.872577 | 1.922644 | 3.189102 | 0.388557 |
| TCGA-MR  | 0.627397 | 0 | 2.019204 | 6.136892 | 0.512981 | 1.313623 | 3.775106 | 0.170197 |
| TCGA-DD  | 4.293151 | 0 | 2.394379 | 6.556043 | 1.028377 | 1.442297 | 3.800715 | 0.827327 |
| TCGA-WX  | 1.523288 | 1 | 2.237283 | 8.047062 | 4.214944 | 0.709974 | 3.780237 | 0.273973 |
| TCGA-DD  | 1.676712 | 1 | 2.947134 | 6.482256 | 4.122868 | 1.106302 | 3.535362 | 0.19577  |
| TCGA-DD  | 1.194521 | 0 | 1.772234 | 6.694614 | 1.300711 | 1.38854  | 3.856065 | 0.462938 |
| TCGA-CC- | 0.821918 | 1 | 2.294923 | 7.789615 | 0.7892   | 2.512103 | 4.181966 | 0.447467 |
| TCGA-DD  | 1.136986 | 1 | 3.437404 | 7.118437 | 4.336016 | 1.572172 | 4.530978 | 0.152512 |
| TCGA-WQ  | 1.082192 | 0 | 1.777438 | 7.218876 | 1.293231 | 1.155629 | 4.035003 | 1.07739  |
| TCGA-DD  | 0.216438 | 0 | 2.981968 | 6.323661 | 0.325177 | 1.654386 | 4.029783 | 0.340309 |
| TCGA-DD  | 0.375342 | 0 | 3.382485 | 6.311347 | 0.595359 | 1.609954 | 3.968286 | 0.12646  |
| TCGA-DD  | 8.926027 | 1 | 1.272113 | 6.498097 | 2.532922 | 1.21808  | 4.6199   | 1.647427 |

Supplementary table 1



|          |          |   |          |          |          |          |          |          |
|----------|----------|---|----------|----------|----------|----------|----------|----------|
| TCGA-DD  | 3.147945 | 1 | 3.085174 | 6.785116 | 3.595379 | 2.337229 | 4.757756 | 4.217943 |
| TCGA-5C- | 0.054795 | 0 | 2.140375 | 7.133671 | 3.599754 | 1.506349 | 5.552667 | 0.90063  |
| TCGA-HP- | 2.060274 | 1 | 2.343505 | 6.485067 | 1.321092 | 1.703726 | 3.898509 | 0.693136 |
| TCGA-T1- | 0.063014 | 0 | 2.255293 | 5.676405 | 4.276645 | 1.214723 | 3.523512 | 1.070431 |
| TCGA-XR- | 3.668493 | 0 | 2.905612 | 6.970183 | 0.730473 | 1.679889 | 3.654175 | 0.83765  |
| TCGA-DD  | 0.024658 | 0 | 2.559319 | 6.915833 | 2.231044 | 1.595026 | 4.23666  | 0.147989 |
| TCGA-MI- | 0.79726  | 0 | 2.442491 | 7.283148 | 1.789707 | 1.002237 | 3.918497 | 0.1796   |
| TCGA-DD  | 1.136986 | 0 | 2.509998 | 7.455687 | 1.661307 | 1.748409 | 4.06203  | 0.378918 |
| TCGA-DD  | 4.279452 | 0 | 1.85069  | 6.38952  | 1.37126  | 1.32785  | 3.939692 | 0.36434  |
| TCGA-DD  | 0.120548 | 0 | 3.567482 | 5.722019 | 0.440375 | 1.844813 | 4.071967 | 0.138766 |
| TCGA-BC- | 4.082192 | 1 | 2.90193  | 6.340001 | 2.74027  | 2.222575 | 3.84018  | 2.357522 |
| TCGA-BC- | 2.326027 | 0 | 3.08069  | 7.275712 | 2.414916 | 2.372056 | 4.792683 | 1.015315 |
| TCGA-XR- | 2.460274 | 0 | 3.603445 | 6.756753 | 1.123509 | 1.80403  | 4.324822 | 0.767819 |
| TCGA-RC- | 0.024658 | 0 | 2.616099 | 7.309123 | 1.646842 | 1.464086 | 5.230422 | 1.181037 |
| TCGA-BC- | 1.216438 | 0 | 2.244718 | 7.70055  | 2.391103 | 1.374062 | 4.346355 | 1.247478 |
| TCGA-DD  | 0.043836 | 1 | 3.225516 | 6.296492 | 1.437755 | 1.713013 | 4.029289 | 0.231536 |
| TCGA-DD  | 2.920548 | 0 | 1.755761 | 6.92243  | 1.540289 | 1.174184 | 4.331839 | 0.103458 |
| TCGA-2Y- | 1.909589 | 0 | 2.059522 | 6.624596 | 0.818008 | 1.315766 | 3.921306 | 0.191999 |
| TCGA-ED- | 2.339726 | 0 | 3.809816 | 7.200236 | 4.281446 | 2.91861  | 4.487631 | 1.029401 |
| TCGA-DD  | 5.139726 | 0 | 1.773208 | 6.680164 | 1.081005 | 1.218299 | 4.379954 | 0.819152 |
| TCGA-G3- | 1.794521 | 0 | 2.525108 | 7.11632  | 0.792078 | 1.324964 | 3.883998 | 0.327486 |
| TCGA-DD  | 6.569863 | 0 | 2.288659 | 5.6655   | 0.671593 | 1.520599 | 4.251395 | 0.689894 |
| TCGA-DD  | 4.641096 | 1 | 2.144563 | 7.382992 | 1.450659 | 1.46351  | 4.373462 | 1.057408 |
| TCGA-EP- | 1.717808 | 1 | 3.007757 | 7.126809 | 2.435638 | 1.314707 | 5.119707 | 0.349992 |
| TCGA-DD  | 1.649315 | 0 | 2.689696 | 7.210984 | 3.586225 | 1.760284 | 5.124681 | 6.370839 |
| TCGA-DD  | 3.547945 | 0 | 2.511424 | 6.110486 | 1.002781 | 1.690834 | 3.494096 | 0.968557 |
| TCGA-DD  | 4.942466 | 0 | 2.162268 | 6.063633 | 0.309372 | 1.661021 | 3.640316 | 0.268552 |
| TCGA-BD- | 3.054795 | 0 | 2.521722 | 7.142636 | 1.835684 | 1.401631 | 3.973617 | 1.507828 |
| TCGA-GJ- | 0.084932 | 1 | 3.21348  | 6.570589 | 1.547044 | 1.789277 | 4.294593 | 0.426615 |
| TCGA-2Y- | 1.983562 | 1 | 2.89666  | 7.128208 | 1.717655 | 2.07722  | 3.652076 | 0.689856 |
| TCGA-BC- | 1.539726 | 0 | 3.343244 | 6.382046 | 2.291174 | 2.337715 | 4.141937 | 0.164121 |
| TCGA-CC- | 0.679452 | 0 | 2.961496 | 7.71262  | 1.739375 | 1.721456 | 3.985338 | 0.299692 |
| TCGA-CC- | 0.832877 | 1 | 3.312386 | 7.995915 | 5.373938 | 1.640703 | 4.576824 | 0.381234 |
| TCGA-DD  | 0.610959 | 1 | 2.231051 | 6.666125 | 1.098874 | 1.445512 | 3.837372 | 0.681206 |
| TCGA-DD  | 6.367123 | 0 | 2.463931 | 7.833569 | 3.679434 | 1.697189 | 4.387811 | 0.567654 |
| TCGA-FV- | 0.00274  | 0 | 1.441198 | 6.854481 | 2.659937 | 1.093058 | 4.502642 | 1.319604 |
| TCGA-DD  | 4.09589  | 0 | 2.998029 | 7.39166  | 0.664008 | 2.441215 | 4.067263 | 0.788921 |
| TCGA-DD  | 2.147945 | 0 | 2.289436 | 6.789532 | 2.575477 | 1.454904 | 3.844286 | 0.402988 |
| TCGA-DD  | 1.808219 | 1 | 2.876078 | 6.020293 | 0.183187 | 1.993932 | 4.354737 | 0.965902 |
| TCGA-DD  | 1.572603 | 0 | 2.659646 | 5.722539 | 0.670958 | 1.714869 | 3.38013  | 0.71885  |
| TCGA-DD  | 0.465753 | 0 | 2.57855  | 6.755194 | 0.767267 | 1.360646 | 4.111913 | 0.137748 |
| TCGA-DD  | 4.616438 | 1 | 1.959594 | 7.101241 | 3.772914 | 1.453589 | 4.597545 | 0.624611 |
| TCGA-G3- | 2.038356 | 0 | 2.209188 | 5.984011 | 0.57784  | 1.213918 | 3.645003 | 0.175507 |
| TCGA-DD  | 4.194521 | 0 | 2.307357 | 5.921693 | 0.189539 | 1.969619 | 3.819581 | 0.366562 |
| TCGA-CC- | 0.279452 | 1 | 3.079519 | 5.919287 | 1.359235 | 2.023082 | 4.800334 | 0.628061 |
| TCGA-G3- | 0.989041 | 0 | 1.778644 | 7.159464 | 1.033263 | 1.155183 | 4.541221 | 0.514049 |
| TCGA-G3- | 1.315068 | 0 | 1.899679 | 6.873988 | 1.79297  | 1.061003 | 3.966087 | 0.476949 |
| TCGA-RC- | 1.293151 | 0 | 2.170411 | 6.185768 | 0.493458 | 2.187155 | 3.140327 | 0.411394 |
| TCGA-DD  | 4.432877 | 0 | 1.853182 | 7.385526 | 4.934255 | 1.207341 | 5.016408 | 2.65494  |
| TCGA-DD  | 2.512329 | 0 | 3.426615 | 8.108597 | 3.186558 | 2.006722 | 4.623758 | 1.615194 |
| TCGA-WX  | 2.071233 | 0 | 2.426033 | 6.951998 | 0.494269 | 1.433329 | 3.352219 | 0.297168 |
| TCGA-2Y- | 4.742466 | 0 | 3.115436 | 7.96972  | 1.534683 | 2.037524 | 4.339038 | 0.939003 |
| TCGA-DD  | 4.473973 | 0 | 2.655441 | 6.638019 | 0.495672 | 1.577437 | 3.806192 | 0.170966 |
| TCGA-ED- | 1.117808 | 0 | 3.043976 | 7.234294 | 1.109526 | 1.989683 | 5.164051 | 1.372654 |
| TCGA-DD  | 9.063014 | 0 | 2.123548 | 5.638042 | 1.599041 | 1.026958 | 3.589502 | 0.207758 |
| TCGA-G3- | 1.838356 | 0 | 2.517093 | 5.865426 | 0.206199 | 1.538785 | 3.030058 | 0.206688 |
| TCGA-FV- | 1.99726  | 0 | 2.525939 | 7.209264 | 5.342271 | 1.445769 | 4.047524 | 0.52565  |
| TCGA-ZP- | 1.082192 | 0 | 3.677133 | 6.501094 | 0.594269 | 1.623635 | 3.663707 | 0.129846 |

Supplementary table 1

|          |          |   |          |          |          |          |          |          |
|----------|----------|---|----------|----------|----------|----------|----------|----------|
| TCGA-DD  | 0.386301 | 0 | 1.81349  | 6.973293 | 0.35155  | 1.280718 | 3.639925 | 0.090626 |
| TCGA-DD  | 1.284932 | 1 | 1.953207 | 6.810775 | 2.130007 | 1.285942 | 4.143898 | 0.109688 |
| TCGA-G3- | 2.10411  | 1 | 2.688763 | 5.527532 | 0.204747 | 1.652635 | 4.229645 | 0.210949 |
| TCGA-ED- | 1.068493 | 0 | 2.049734 | 6.883144 | 0.618213 | 1.628834 | 4.15289  | 0.546269 |
| TCGA-EP- | 0.052055 | 1 | 2.697348 | 6.113752 | 3.542924 | 1.594378 | 3.408416 | 0.383053 |
| TCGA-BC- | 2.109589 | 1 | 2.6131   | 6.46807  | 0.858408 | 1.63132  | 3.577205 | 1.010336 |
| TCGA-CC- | 1        | 0 | 3.255583 | 6.887171 | 0.515632 | 1.717983 | 3.582685 | 0.216405 |
| TCGA-DD  | 0.030137 | 1 | 2.437754 | 5.526448 | 1.591657 | 1.140321 | 3.454527 | 0.190752 |
| TCGA-DD  | 0.293151 | 1 | 2.353099 | 7.191544 | 4.969552 | 1.683845 | 4.359299 | 1.080078 |
| TCGA-DD  | 4.443836 | 1 | 2.589351 | 6.408461 | 1.924858 | 1.316602 | 3.331151 | 0.474744 |
| TCGA-CC- | 0.819178 | 1 | 2.114837 | 7.676898 | 1.772373 | 1.55473  | 4.296846 | 2.229299 |
| TCGA-DD  | 1.978082 | 0 | 2.163816 | 7.011342 | 2.601426 | 1.18773  | 3.71323  | 0.311973 |
| TCGA-DD  | 7.539726 | 0 | 2.678138 | 6.955095 | 0.927715 | 1.011703 | 3.859096 | 0.211395 |
| TCGA-G3- | 0.969863 | 0 | 2.285108 | 7.533808 | 1.132609 | 1.16367  | 4.34662  | 0.206631 |
| TCGA-G3- | 1.843836 | 0 | 2.451212 | 6.556505 | 1.210427 | 1.357442 | 4.003834 | 0.533329 |
| TCGA-CC- | 0.238356 | 1 | 3.103933 | 6.806183 | 1.674987 | 2.527089 | 5.185893 | 2.328694 |
| TCGA-CC- | 1.046575 | 0 | 3.130345 | 8.116474 | 3.020576 | 2.292702 | 4.47565  | 5.089502 |
| TCGA-DD  | 3.315068 | 1 | 2.128661 | 6.211361 | 0.69608  | 1.412693 | 3.594026 | 0.244151 |
| TCGA-DD  | 8.561644 | 1 | 2.161286 | 6.668234 | 0.592795 | 1.145535 | 4.306416 | 0.298182 |
| TCGA-NI- | 4.906849 | 1 | 2.142957 | 6.136004 | 0.473006 | 1.246182 | 3.359938 | 0.202649 |
| TCGA-DD  | 2.580822 | 0 | 3.712111 | 5.978111 | 3.500317 | 1.547544 | 3.015444 | 0.262834 |
| TCGA-DD  | 2.972603 | 0 | 2.47327  | 7.304452 | 2.543163 | 1.565115 | 4.92606  | 1.355756 |
| TCGA-DD  | 2.761644 | 0 | 2.969736 | 7.376494 | 1.568143 | 2.645218 | 5.483441 | 2.583605 |
| TCGA-BC- | 2.293151 | 1 | 2.701885 | 6.596699 | 0.700313 | 1.699306 | 3.433187 | 0.894051 |
| TCGA-RC- | 1.282192 | 0 | 1.79138  | 7.688034 | 0.574829 | 1.558067 | 4.842571 | 0.99329  |
| TCGA-WJ- | 0.945205 | 0 | 2.959447 | 6.824741 | 1.063766 | 1.983609 | 4.14659  | 0.09962  |
| TCGA-DD  | 1.123288 | 1 | 3.155827 | 7.835856 | 1.063904 | 2.489631 | 4.320044 | 1.01483  |
| TCGA-CC- | 0.594521 | 1 | 2.85005  | 6.891583 | 2.569786 | 1.761182 | 3.412829 | 0.638344 |
| TCGA-DD  | 4.994521 | 0 | 2.356143 | 7.163887 | 1.120111 | 2.183447 | 4.113148 | 0.471661 |
| TCGA-DD  | 1.764384 | 0 | 1.686437 | 6.959001 | 1.07864  | 1.210882 | 3.649406 | 0.518857 |
| TCGA-BC- | 1.863014 | 0 | 3.561489 | 6.936239 | 0.609531 | 2.352174 | 4.780771 | 0.361658 |
| TCGA-DD  | 5.838356 | 1 | 2.154994 | 5.716814 | 0.446743 | 1.224799 | 3.048039 | 0.126306 |
| TCGA-DD  | 6.884932 | 0 | 2.566676 | 7.008465 | 3.447015 | 1.486849 | 4.038892 | 1.279142 |
| TCGA-CC- | 1.093151 | 0 | 2.535694 | 7.802054 | 1.485689 | 2.001547 | 5.095339 | 1.643098 |
| TCGA-DD  | 3.567123 | 0 | 2.92279  | 7.398507 | 1.097192 | 2.154771 | 4.260962 | 1.015521 |
| TCGA-2Y- | 6.690411 | 0 | 2.751196 | 6.779542 | 2.163657 | 1.970731 | 4.10404  | 1.977671 |
| TCGA-CC- | 0.830137 | 1 | 2.397351 | 7.518364 | 0.739277 | 2.314314 | 4.807737 | 3.392264 |
| TCGA-DD  | 1.183562 | 1 | 2.427563 | 6.964982 | 0.335434 | 1.580586 | 4.390448 | 0.153127 |
| TCGA-RC- | 1.586301 | 0 | 1.886817 | 6.624201 | 1.021897 | 1.327839 | 2.8347   | 0.611802 |
| TCGA-DD  | 1.608219 | 0 | 3.106708 | 7.364809 | 0.994466 | 2.352702 | 4.40233  | 1.015898 |
| TCGA-G3- | 2.136986 | 0 | 2.827096 | 6.706568 | 0.901483 | 1.652089 | 4.048809 | 1.801884 |
| TCGA-DD  | 0.50137  | 0 | 2.648812 | 7.391329 | 1.567261 | 1.919031 | 3.815206 | 1.385356 |
| TCGA-ZP- | 1.934247 | 0 | 2.847132 | 7.196072 | 1.835287 | 1.693954 | 4.643184 | 1.383819 |
| TCGA-KR- | 0.178082 | 1 | 3.185268 | 6.670108 | 2.062699 | 1.248765 | 3.342703 | 0.808558 |
| TCGA-BC- | 1.947945 | 1 | 2.990918 | 6.300066 | 0.890898 | 1.753183 | 4.407494 | 0.29378  |
| TCGA-ED- | 1.112329 | 0 | 2.936815 | 7.164619 | 0.719867 | 1.970867 | 3.619156 | 0.499904 |
| TCGA-CC- | 0.578082 | 0 | 2.529742 | 7.48406  | 0.97498  | 1.735544 | 3.879261 | 0.191617 |
| TCGA-UB- | 1.646575 | 0 | 2.843888 | 7.761446 | 0.321068 | 1.970916 | 4.704637 | 0.55104  |
| TCGA-ED- | 1.158904 | 0 | 2.851971 | 6.729395 | 2.111616 | 1.957145 | 4.212368 | 1.93986  |
| TCGA-XR- | 2.534247 | 0 | 3.536192 | 6.683767 | 4.667445 | 1.543715 | 3.614413 | 0.563574 |
| TCGA-DD  | 1        | 1 | 1.728841 | 6.446772 | 0.91831  | 1.480318 | 4.241095 | 2.070122 |
| TCGA-K7- | 1.728767 | 0 | 1.9356   | 6.268097 | 1.700856 | 1.474507 | 3.753449 | 0.822073 |
| TCGA-ZP- | 0.057534 | 0 | 2.403756 | 6.779447 | 1.416658 | 1.872485 | 4.609382 | 0.986237 |
| TCGA-DD  | 1.147945 | 1 | 2.006081 | 7.421534 | 1.846588 | 1.338865 | 4.576487 | 0.574368 |
| TCGA-DD  | 5.983562 | 0 | 2.219523 | 6.444605 | 0.900292 | 1.508929 | 3.095855 | 0.2472   |
| TCGA-2Y- | 4.153425 | 0 | 1.983541 | 7.382867 | 3.37465  | 1.235127 | 4.274624 | 0.860043 |
| TCGA-DD  | 2.709589 | 0 | 2.816038 | 6.626652 | 1.336481 | 1.94674  | 3.936359 | 3.388079 |
| TCGA-EP- | 1.665753 | 0 | 3.271453 | 6.471992 | 0.631793 | 1.632916 | 3.486173 | 0.187107 |

Supplementary table 1

|          |          |   |          |          |          |          |          |          |
|----------|----------|---|----------|----------|----------|----------|----------|----------|
| TCGA-DD  | 4.706849 | 0 | 2.240343 | 6.414228 | 1.251788 | 1.382934 | 3.432168 | 0.799925 |
| TCGA-ED- | 0.016438 | 0 | 3.300042 | 7.083329 | 0.498712 | 1.166554 | 3.569032 | 0.576575 |
| TCGA-LG- | 1.060274 | 0 | 2.291391 | 6.330213 | 0.44251  | 1.606458 | 3.903303 | 0.06533  |
| TCGA-UB- | 1.331507 | 0 | 2.361816 | 6.308608 | 2.474753 | 1.693693 | 3.971445 | 0.785784 |
| TCGA-G3- | 0.153425 | 1 | 3.383061 | 7.237315 | 2.759147 | 2.393275 | 4.935602 | 1.836864 |
| TCGA-DD  | 5.758904 | 0 | 2.004119 | 7.984186 | 0.669163 | 1.039235 | 3.716396 | 0.076677 |
| TCGA-LG- | 1.00274  | 0 | 1.98088  | 7.231853 | 0.748348 | 1.090766 | 3.457158 | 0.322277 |
| TCGA-ZS- | 0.934247 | 0 | 2.805741 | 6.070284 | 1.32896  | 1.235218 | 3.524445 | 0.727375 |
| TCGA-K7- | 1.40274  | 0 | 1.883333 | 6.403784 | 1.360593 | 1.174782 | 3.576705 | 0.652774 |
| TCGA-DD  | 1.29863  | 0 | 1.090394 | 5.574506 | 2.460532 | 0.6303   | 3.425361 | 0.116144 |
| TCGA-DD  | 5.449315 | 0 | 3.124425 | 5.965074 | 3.490608 | 1.353243 | 2.994559 | 0.135174 |
| TCGA-DD  | 9.416438 | 0 | 2.531561 | 7.348405 | 0.790962 | 1.593176 | 4.271136 | 0.597117 |
| TCGA-DD  | 3.378082 | 0 | 2.555028 | 7.014222 | 1.9295   | 1.678305 | 3.258364 | 0.686295 |
| TCGA-G3- | 0.983562 | 1 | 2.75118  | 7.203145 | 3.251786 | 1.794702 | 3.833155 | 0.357582 |
| TCGA-O8- | 1.473973 | 0 | 1.690855 | 7.171607 | 1.625397 | 1.192924 | 3.840362 | 0.769708 |
| TCGA-ZP- | 2.142466 | 0 | 2.316414 | 5.885318 | 0.936856 | 1.490782 | 3.40273  | 0.679089 |
| TCGA-G3- | 1.178082 | 0 | 2.081866 | 6.618208 | 1.903692 | 1.227817 | 3.891033 | 0.477267 |
| TCGA-DD  | 1.520548 | 0 | 2.278752 | 8.4216   | 1.980569 | 1.73084  | 5.020662 | 1.561915 |

Supplementary table 1



| riskScore | risk |
|-----------|------|
| 1.60766   | low  |
| 2.376382  | high |
| 1.660299  | low  |
| 1.94703   | low  |
| 2.515295  | high |
| 2.065627  | high |
| 2.414556  | high |
| 2.035744  | high |
| 1.482977  | low  |
| 2.026678  | high |
| 1.739007  | low  |
| 2.253623  | high |
| 2.128035  | high |
| 2.083409  | high |
| 1.700667  | low  |
| 2.036506  | high |
| 1.927979  | low  |
| 2.166827  | high |
| 1.721556  | low  |
| 2.145921  | high |
| 2.23553   | high |
| 1.803436  | low  |
| 2.103016  | high |
| 2.208014  | high |
| 2.003189  | high |
| 2.040978  | high |
| 1.993703  | high |
| 2.156052  | high |
| 1.76054   | low  |
| 2.046729  | high |
| 1.736634  | low  |
| 1.745996  | low  |
| 1.60113   | low  |
| 2.323932  | high |
| 2.234568  | high |
| 1.467041  | low  |
| 2.006181  | high |
| 1.805922  | low  |
| 2.040049  | high |
| 2.011719  | high |
| 1.451398  | low  |
| 1.892393  | low  |
| 1.801265  | low  |
| 1.952715  | low  |
| 1.565471  | low  |
| 1.657409  | low  |
| 2.466028  | high |
| 2.16804   | high |
| 1.888167  | low  |
| 2.335994  | high |
| 2.049864  | high |
| 2.224559  | high |
| 2.259161  | high |
| 1.938494  | low  |
| 2.045842  | high |
| 2.48991   | high |
| 1.747168  | low  |

Supplementary table 1

2.015381 high  
1.909928 low  
2.118935 high  
2.039536 high  
2.058232 high  
1.423337 low  
1.847429 low  
2.042523 high  
1.73571 low  
2.125684 high  
1.966409 low  
1.747013 low  
1.830292 low  
1.764945 low  
1.787612 low  
2.033664 high  
2.124679 high  
1.936933 low  
1.926321 low  
1.538343 low  
2.189289 high  
2.160468 high  
2.531251 high  
2.147618 high  
2.219792 high  
2.032916 high  
1.540399 low  
2.08665 high  
1.844177 low  
1.983353 high  
1.68138 low  
1.977979 high  
1.886995 low  
1.858913 low  
2.183154 high  
2.230257 high  
1.985488 high  
2.097927 high  
2.268313 high  
1.836224 low  
2.113293 high  
2.042632 high  
1.963228 low  
1.819245 low  
2.021949 high  
2.371256 high  
2.330432 high  
1.80719 low  
2.03345 high  
2.063279 high  
1.759818 low  
1.885217 low  
2.06708 high  
2.00567 high  
1.546595 low  
2.021427 high  
2.215688 high  
1.808465 low

1.888022 low  
1.877013 low  
1.93459 low  
2.157119 high  
1.651993 low  
2.064786 high  
1.741121 low  
1.959148 low  
1.969901 low  
2.453433 high  
1.915756 low  
1.720706 low  
2.054992 high  
2.038408 high  
2.038282 high  
2.081068 high  
1.910049 low  
2.16386 high  
1.613793 low  
1.869837 low  
2.245011 high  
2.058722 high  
1.81126 low  
1.751883 low  
1.538498 low  
1.693375 low  
2.126726 high  
2.240609 high  
1.615848 low  
1.758431 low  
1.808025 low  
1.844952 low  
2.116674 high  
2.327283 high  
1.642321 low  
1.958399 low  
1.988339 high  
2.07846 high  
1.910261 low  
1.943259 low  
2.137952 high  
2.196038 high  
1.712528 low  
1.932064 low  
1.914419 low  
2.088921 high  
1.690905 low  
1.933273 low  
1.804635 low  
1.818538 low  
1.845698 low  
1.84803 low  
1.900143 low  
1.782272 low  
2.08808 high  
1.517473 low  
2.317479 high  
2.514001 high

Supplementary table 1



2.208843 high  
2.216564 high  
1.666726 low  
2.187101 high  
1.731372 low  
1.902262 low  
2.39909 high  
1.946008 low  
2.036515 high  
2.277806 high  
1.820559 low  
2.068991 high  
2.466755 high  
2.129779 high  
1.968125 low  
2.181517 high  
2.163418 high  
1.949914 low  
2.275673 high  
1.958878 low  
1.712451 low  
2.084958 high  
1.818814 low  
1.952162 low  
1.941579 low  
1.82942 low  
2.005184 high  
1.938809 low  
1.730338 low  
2.177558 high  
2.399603 high  
1.757585 low  
1.752426 low  
2.507057 high  
2.392248 high  
2.082622 high  
2.118725 high  
1.795257 low  
2.071192 high  
1.675859 low  
1.926486 low  
1.979626 high  
1.83698 low  
1.639661 low  
1.945794 low  
2.017041 high  
1.914059 low  
1.603595 low  
1.808249 low  
1.982789 high  
2.039303 high  
1.67225 low  
2.12221 high  
2.363015 high  
1.701848 low  
1.928126 low  
2.029961 high  
1.597069 low

2.388057 high  
2.021632 high  
1.854831 low  
1.810937 low  
2.008112 high  
1.994465 high  
1.862292 low  
2.039009 high  
1.649998 low  
2.045663 high  
2.174061 high  
2.348742 high  
2.221078 high  
2.034137 high  
1.989981 high  
2.060093 high  
1.677106 low  
1.692924 low  
2.725311 high  
1.643951 low  
1.867338 low  
1.682653 low  
1.888987 low  
2.116066 high  
2.262718 high  
1.824138 low  
1.682064 low  
1.959717 low  
2.119172 high  
2.154983 high  
2.269353 high  
2.178263 high  
2.511125 high  
1.784431 low  
2.189732 high  
1.657925 low  
2.23121 high  
1.897896 low  
1.937796 low  
1.795349 low  
1.847914 low  
1.943875 low  
1.614605 low  
1.759035 low  
2.058832 high  
1.687685 low  
1.694748 low  
1.796505 low  
2.004568 high  
2.509981 high  
1.811896 low  
2.311165 high  
1.870756 low  
2.200772 high  
1.575428 low  
1.701205 low  
2.171346 high  
2.120014 high

Supplementary table 1

1.62987 low  
1.763618 low  
1.758589 low  
1.778431 low  
1.991153 high  
1.874405 low  
2.071894 high  
1.65801 low  
2.164002 high  
1.851294 low  
1.962406 low  
1.838896 low  
1.833402 low  
1.85665 low  
1.819314 low  
2.311023 high  
2.515001 high  
1.664858 low  
1.689792 low  
1.608425 low  
2.205417 high  
2.06258 high  
2.371133 high  
1.910142 low  
1.815618 low  
2.08664 high  
2.364133 high  
2.098245 high  
2.019795 high  
1.630274 low  
2.31341 high  
1.5476 low  
2.063987 high  
2.165294 high  
2.191855 high  
2.109811 high  
2.12466 high  
1.85902 low  
1.638939 low  
2.269153 high  
1.983489 high  
2.097177 high  
2.119272 high  
2.029758 high  
1.988781 high  
2.08842 high  
1.998092 high  
2.141848 high  
2.126059 high  
2.330312 high  
1.655505 low  
1.703739 low  
1.964162 low  
1.858544 low  
1.731356 low  
1.912191 low  
2.066427 high  
2.015049 high



1.744641 low  
2.004206 high  
1.747778 low  
1.906679 low  
2.456479 high  
1.770258 low  
1.686503 low  
1.823886 low  
1.623542 low  
1.279472 low  
2.017897 high  
1.960132 low  
1.982488 high  
2.164151 high  
1.692384 low  
1.701876 low  
1.746273 low  
2.148105 high

### Supplementary table 1

**Supplementary Table 2: Supplementary Table 2 is the risk score table for the GEO84437 cohort.**

| id      | futime   | fustat | ATF1     | ATF4     | BATF     | CREB1    | CREB3    | CREB3L1  |
|---------|----------|--------|----------|----------|----------|----------|----------|----------|
| DO50814 | 1.150685 | 0      | 1.642937 | 7.323085 | 1.782275 | 1.521785 | 4.408703 | 0.413507 |
| DO45133 | 1.808219 | 1      | 2.78563  | 6.291894 | 0.411828 | 1.355047 | 2.985808 | 0.095547 |
| DO48700 | 2.219178 | 0      | 2.578912 | 7.903    | 2.717977 | 1.952382 | 3.999457 | 1.709875 |
| DO45094 | 4.520548 | 0      | 2.354423 | 6.412808 | 1.340935 | 1.482285 | 3.508491 | 0.590475 |
| DO50806 | 1.479452 | 0      | 2.395317 | 8.371986 | 2.547241 | 1.78888  | 3.756529 | 0.270381 |
| DO45193 | 0.328767 | 1      | 3.272388 | 6.184941 | 1.008991 | 2.52063  | 3.72988  | 0.048642 |
| DO45283 | 1.39726  | 0      | 3.088479 | 8.731489 | 1.610367 | 2.252141 | 4.719297 | 2.199946 |
| DO45092 | 3.287671 | 1      | 3.206522 | 7.980898 | 1.996482 | 1.788355 | 3.882803 | 1.51322  |
| DO45263 | 0.739726 | 1      | 3.332684 | 6.583532 | 2.968635 | 2.223093 | 4.376327 | 2.095957 |
| DO23513 | 3.287671 | 0      | 3.523404 | 6.6982   | 0.570905 | 1.857944 | 4.32594  | 0.088162 |
| DO48759 | 1.972603 | 0      | 2.538664 | 7.907743 | 1.035842 | 1.370891 | 3.980995 | 0.675877 |
| DO45205 | 0.246575 | 1      | 3.446391 | 7.004277 | 0.63144  | 2.302649 | 4.955099 | 0.777959 |
| DO45211 | 0.657534 | 0      | 2.672256 | 7.290892 | 2.808917 | 2.375029 | 3.168623 | 2.067503 |
| DO45239 | 2.383562 | 0      | 3.42256  | 7.223345 | 2.1633   | 2.184577 | 4.028065 | 0.080297 |
| DO50813 | 1.150685 | 0      | 1.922836 | 7.083559 | 1.455697 | 1.599502 | 4.106689 | 0.710788 |
| DO23541 | 2.547945 | 0      | 2.579187 | 6.90919  | 1.320438 | 1.922943 | 3.742941 | 0.81383  |
| DO23532 | 2.630137 | 0      | 1.968694 | 7.602543 | 0.839499 | 1.185349 | 4.100468 | 0.477298 |
| DO48725 | 2.136986 | 0      | 2.758302 | 7.801301 | 2.207507 | 1.799094 | 4.005354 | 0.852963 |
| DO50778 | 1.726027 | 0      | 3.29128  | 8.190267 | 3.188824 | 2.357046 | 3.858939 | 2.820071 |
| DO45139 | 3.616438 | 0      | 2.599018 | 7.17337  | 1.870715 | 2.029735 | 4.543623 | 1.88217  |
| DO45129 | 4.027397 | 0      | 3.574012 | 6.400073 | 3.37782  | 1.52807  | 3.27611  | 0.348342 |
| DO45253 | 2.383562 | 0      | 3.208073 | 7.686275 | 0.807902 | 2.217592 | 4.045427 | 2.629883 |
| DO23535 | 2.630137 | 0      | 2.818192 | 6.983398 | 1.965213 | 2.413806 | 3.756064 | 2.45697  |
| DO48747 | 1.479452 | 0      | 2.180606 | 8.347829 | 5.634068 | 1.629769 | 5.041504 | 3.008385 |
| DO50844 | 0.821918 | 0      | 2.715628 | 6.956354 | 0.222073 | 2.571547 | 4.149304 | 1.587465 |
| DO45241 | 2.958904 | 0      | 2.431527 | 8.608882 | 2.651797 | 1.214635 | 3.972766 | 2.420254 |
| DO23540 | 2.054795 | 0      | 2.2749   | 8.14969  | 1.228295 | 1.419166 | 4.470103 | 0.758325 |
| DO45297 | 3.452055 | 1      | 2.543702 | 8.040278 | 3.434321 | 2.523675 | 3.946193 | 5.041888 |
| DO23521 | 3.041096 | 0      | 3.138749 | 8.217541 | 2.929539 | 2.623443 | 4.837334 | 0.651334 |
| DO48742 | 1.643836 | 0      | 2.211143 | 6.400745 | 0.881995 | 1.472329 | 2.981865 | 0.520673 |
| DO45095 | 4.438356 | 0      | 2.350171 | 7.410877 | 3.83431  | 1.717614 | 3.940369 | 1.051144 |
| DO23531 | 2.465753 | 0      | 2.674872 | 6.38018  | 1.464544 | 1.87657  | 3.095709 | 0.334196 |
| DO45091 | 3.616438 | 1      | 3.054003 | 7.11028  | 1.178442 | 1.819765 | 4.091948 | 0.091431 |
| DO23542 | 2.630137 | 0      | 4.206971 | 7.324091 | 1.700986 | 1.77048  | 3.596369 | 0.108323 |
| DO23527 | 2.876712 | 0      | 2.527687 | 6.680382 | 1.398528 | 1.791048 | 3.192798 | 0.714157 |
| DO45259 | 0.90411  | 0      | 2.81946  | 7.101902 | 0.609898 | 2.128065 | 4.269638 | 0.586262 |
| DO45137 | 3.616438 | 0      | 2.585986 | 6.764561 | 0.960206 | 2.581635 | 3.351012 | 1.678204 |
| DO48723 | 1.643836 | 0      | 3.100769 | 8.053102 | 4.651583 | 1.60732  | 4.210217 | 0.101664 |
| DO45165 | 1.890411 | 0      | 2.886494 | 7.474034 | 2.862803 | 2.212084 | 3.686252 | 1.788014 |
| DO45225 | 2.876712 | 0      | 2.693001 | 7.009704 | 2.104454 | 2.561151 | 3.798563 | 0.788847 |
| DO23539 | 3.041096 | 0      | 2.752233 | 7.767738 | 2.074555 | 1.2758   | 3.946952 | 0.468491 |
| DO48733 | 1.643836 | 0      | 2.738656 | 7.346028 | 2.041734 | 2.181956 | 4.099873 | 1.438317 |
| DO45183 | 1.561644 | 1      | 3.178541 | 7.535334 | 1.381535 | 2.10776  | 3.906398 | 0.29967  |
| DO23530 | 0.493151 | 1      | 2.988087 | 7.804862 | 4.304253 | 2.136953 | 4.013059 | 2.902102 |
| DO23518 | 3.616438 | 0      | 2.498503 | 6.700781 | 1.196056 | 1.468617 | 4.176616 | 0.501588 |
| DO45281 | 2.054795 | 0      | 3.045178 | 7.536602 | 2.131749 | 1.624712 | 3.517041 | 1.281909 |
| DO48741 | 0.657534 | 0      | 2.440812 | 6.642987 | 1.335776 | 1.558625 | 3.345819 | 0        |
| DO45219 | 2.958904 | 0      | 2.997259 | 7.459175 | 1.039974 | 2.506939 | 3.378893 | 1.219672 |
| DO48730 | 1.726027 | 0      | 2.733993 | 8.582049 | 3.029663 | 2.301622 | 4.909585 | 0.431452 |
| DO45101 | 4.60274  | 0      | 2.063717 | 7.571145 | 1.057472 | 1.197331 | 3.564006 | 0.575795 |
| DO45097 | 4.438356 | 0      | 3.0323   | 7.394512 | 0.190412 | 1.631862 | 3.935211 | 0        |
| DO48706 | 2.383562 | 0      | 3.020641 | 7.026871 | 1.347658 | 1.866487 | 3.258864 | 0.06434  |
| DO45175 | 3.123288 | 0      | 3.128883 | 6.737773 | 0.604278 | 1.205752 | 3.085028 | 0.058645 |
| DO45267 | 1.561644 | 1      | 4.079795 | 7.9636   | 4.675533 | 1.999751 | 4.067724 | 0.413264 |
| DO23547 | 2.794521 | 0      | 2.87823  | 8.406861 | 4.278798 | 2.336143 | 4.125189 | 2.779889 |
| DO23516 | 0.054795 | 1      | 3.089604 | 7.34304  | 2.784637 | 1.68532  | 4.160792 | 0.112238 |
| DO48715 | 1.890411 | 1      | 2.22085  | 7.338237 | 2.071557 | 1.583626 | 4.208414 | 0.176769 |

|         |          |   |          |          |          |          |          |          |
|---------|----------|---|----------|----------|----------|----------|----------|----------|
| DO50825 | 1.068493 | 0 | 3.279393 | 7.756994 | 1.381409 | 1.749945 | 3.085362 | 0.056957 |
| DO48721 | 2.465753 | 0 | 2.070013 | 5.513998 | 0.170218 | 1.446238 | 3.510186 | 0.449792 |
| DO45249 | 1.726027 | 0 | 3.03593  | 8.238863 | 2.688271 | 2.225262 | 4.139711 | 1.848703 |
| DO45117 | 3.041096 | 1 | 3.298953 | 6.870187 | 1.893546 | 2.041673 | 3.275897 | 0.175223 |
| DO50774 | 1.972603 | 0 | 2.637468 | 6.814416 | 1.740625 | 1.666644 | 3.906208 | 1.002185 |
| DO48760 | 1.890411 | 0 | 2.482317 | 6.539814 | 0.49845  | 1.231211 | 3.12734  | 0.19266  |
| DO45247 | 0.575342 | 0 | 3.086524 | 7.151191 | 0.328399 | 2.446919 | 2.950626 | 0.310647 |
| DO23515 | 3.369863 | 0 | 3.061034 | 8.650409 | 2.1061   | 1.958424 | 4.209921 | 1.648321 |
| DO45195 | 1.068493 | 0 | 2.309151 | 7.147289 | 3.22031  | 1.197773 | 2.835314 | 0.152041 |
| DO45169 | 3.69863  | 0 | 2.467943 | 6.886188 | 0.664625 | 1.533318 | 3.105681 | 0.066658 |
| DO48674 | 3.452055 | 0 | 1.941744 | 7.156675 | 0.438395 | 1.086659 | 3.274636 | 0.168693 |
| DO45237 | 2.465753 | 0 | 2.979733 | 6.683573 | 1.362676 | 2.198842 | 3.746133 | 2.111863 |
| DO48677 | 3.123288 | 0 | 3.133501 | 6.260674 | 0.099264 | 1.691834 | 3.173382 | 0.475338 |
| DO23534 | 2.30137  | 0 | 2.192018 | 6.697892 | 0.315088 | 1.495062 | 3.352223 | 0.164879 |
| DO50820 | 1.39726  | 0 | 2.61603  | 6.842915 | 0.67967  | 2.467854 | 3.691905 | 1.327915 |
| DO45255 | 1.972603 | 0 | 2.892262 | 7.414179 | 1.95256  | 1.416755 | 4.20819  | 0.118995 |
| DO48712 | 2.219178 | 0 | 2.981229 | 7.01635  | 1.298068 | 2.016    | 3.354014 | 2.413526 |
| DO45275 | 0.027397 | 1 | 3.701764 | 7.804227 | 3.44866  | 2.219656 | 5.093542 | 4.891405 |
| DO45305 | 0.821918 | 0 | 2.972222 | 8.280025 | 1.620863 | 2.093944 | 5.481103 | 1.57751  |
| DO45127 | 1.150685 | 1 | 3.68883  | 7.483337 | 2.4771   | 2.444573 | 3.971143 | 2.780462 |
| DO45203 | 3.205479 | 0 | 3.208553 | 7.689214 | 2.009905 | 2.398556 | 3.828839 | 0.717169 |
| DO50816 | 1.068493 | 0 | 2.894995 | 7.278866 | 1.142325 | 1.288207 | 3.695201 | 0.329481 |
| DO50832 | 0.246575 | 0 | 2.576389 | 6.2505   | 0.323647 | 1.805392 | 2.836093 | 0        |
| DO45157 | 5.424658 | 0 | 2.735282 | 7.105037 | 3.635437 | 2.438674 | 4.229104 | 1.629914 |
| DO48682 | 0.328767 | 1 | 2.877775 | 8.255975 | 0.155476 | 1.759101 | 4.328363 | 0.524343 |
| DO50811 | 1.232877 | 0 | 2.241762 | 8.251283 | 0.418881 | 1.798021 | 3.629798 | 0.137478 |
| DO45215 | 3.205479 | 0 | 2.712973 | 7.413766 | 0.533297 | 1.774108 | 3.217723 | 0.681052 |
| DO48751 | 1.315068 | 1 | 3.555609 | 7.774755 | 0.127846 | 1.666673 | 4.21852  | 0.10241  |
| DO48736 | 1.643836 | 0 | 2.617967 | 7.508616 | 2.471231 | 2.071045 | 3.90169  | 1.37487  |
| DO45209 | 3.69863  | 0 | 2.161677 | 8.587025 | 4.047106 | 2.223763 | 4.859144 | 0.168814 |
| DO50839 | 0.90411  | 0 | 1.792222 | 7.08394  | 1.212491 | 0.75743  | 4.051315 | 0.493671 |
| DO50793 | 1.479452 | 0 | 2.756942 | 7.574256 | 0.511731 | 2.073119 | 3.78062  | 0.301801 |
| DO50776 | 1.890411 | 0 | 2.592156 | 7.214168 | 1.61265  | 1.467412 | 3.276326 | 1.138757 |
| DO45113 | 4.273973 | 0 | 2.756262 | 7.533241 | 0.513543 | 2.195083 | 4.128747 | 0.135508 |
| DO48761 | 2.383562 | 0 | 3.262283 | 6.864797 | 1.078503 | 2.074672 | 3.789235 | 0.155461 |
| DO45223 | 2.794521 | 0 | 3.126125 | 7.299149 | 1.383882 | 2.474938 | 3.350667 | 1.549135 |
| DO45141 | 3.616438 | 0 | 3.113827 | 6.882274 | 2.278194 | 2.338393 | 3.620233 | 0.561119 |
| DO45119 | 1.39726  | 1 | 3.793704 | 7.923538 | 0.577561 | 2.48217  | 4.59656  | 1.082285 |
| DO45099 | 4.356164 | 0 | 2.285    | 7.206916 | 0.936748 | 1.752486 | 3.732501 | 0.814053 |
| DO45107 | 4.684932 | 0 | 2.685578 | 7.546793 | 0.643149 | 1.569911 | 3.636019 | 0.293213 |
| DO48717 | 0.493151 | 1 | 3.576733 | 7.416228 | 1.804482 | 2.063439 | 4.79519  | 4.211602 |
| DO23536 | 2.547945 | 0 | 2.781092 | 5.634542 | 1.950618 | 1.966594 | 3.001019 | 0.392217 |
| DO45185 | 1.643836 | 0 | 3.02294  | 7.191706 | 1.518431 | 2.363778 | 4.762262 | 0.234018 |
| DO45231 | 2.547945 | 0 | 3.17359  | 6.981088 | 1.146194 | 2.210392 | 3.960861 | 1.825549 |
| DO48728 | 0.410959 | 0 | 3.098688 | 7.859878 | 3.287874 | 2.532643 | 3.93042  | 1.445305 |
| DO45096 | 3.534247 | 1 | 2.225612 | 6.873472 | 0.646521 | 2.122588 | 3.800587 | 0.195236 |
| DO50859 | 0.493151 | 0 | 2.495217 | 7.420626 | 0.376454 | 1.985419 | 2.945553 | 0.133059 |
| DO23524 | 2.876712 | 0 | 3.678115 | 7.677448 | 2.264624 | 2.166108 | 4.271293 | 0.629811 |
| DO48743 | 1.561644 | 0 | 2.79463  | 7.005207 | 1.760414 | 2.033739 | 3.615639 | 1.183398 |
| DO45289 | 0.986301 | 0 | 2.773451 | 8.350217 | 0.709391 | 2.002928 | 4.553176 | 2.367226 |
| DO45189 | 3.287671 | 0 | 3.37769  | 7.127788 | 0.537572 | 2.853919 | 3.905493 | 0.854816 |
| DO23519 | 1.726027 | 0 | 2.695232 | 8.153092 | 2.842706 | 1.660806 | 5.054373 | 1.839667 |
| DO23538 | 1.232877 | 0 | 2.686163 | 6.383946 | 0.545665 | 1.665837 | 2.966246 | 0.205409 |
| DO23544 | 2.630137 | 0 | 2.208439 | 7.903548 | 1.633213 | 1.380653 | 3.431874 | 0.301733 |
| DO45173 | 3.205479 | 0 | 3.008677 | 7.800257 | 0.722321 | 1.329649 | 4.278321 | 0.237688 |
| DO45161 | 1.479452 | 1 | 2.99483  | 7.747519 | 1.698262 | 2.226184 | 3.580839 | 0.587304 |
| DO50850 | 1.972603 | 0 | 2.809295 | 7.232845 | 1.246514 | 1.656068 | 3.621369 | 1.202387 |
| DO45103 | 1.232877 | 0 | 2.821684 | 7.254252 | 1.874952 | 2.323427 | 4.203176 | 2.800089 |

Supplementary table 2



|         |          |   |          |          |          |          |          |          |
|---------|----------|---|----------|----------|----------|----------|----------|----------|
| DO50807 | 1.479452 | 0 | 2.339267 | 6.442595 | 0.838855 | 1.789584 | 3.404641 | 0.173111 |
| DO45121 | 4.191781 | 0 | 2.998114 | 7.010608 | 1.61474  | 2.233822 | 3.809726 | 0.778488 |
| DO50787 | 1.315068 | 0 | 2.805311 | 6.566876 | 2.297637 | 1.798402 | 3.757083 | 0.266314 |
| DO23545 | 1.561644 | 1 | 2.462083 | 7.758553 | 1.339237 | 1.666767 | 3.873413 | 0.69154  |
| DO45273 | 1.315068 | 0 | 2.615324 | 8.143024 | 2.358961 | 2.390878 | 3.850825 | 1.614973 |
| DO23551 | 0.410959 | 1 | 2.60148  | 7.306284 | 2.757074 | 1.973284 | 3.561574 | 0.506372 |
| DO50840 | 0.90411  | 0 | 2.167284 | 7.40181  | 0.582841 | 1.818662 | 4.458496 | 0.134362 |
| DO45155 | 5.917808 | 0 | 2.817855 | 7.191555 | 1.281769 | 2.596803 | 3.717215 | 4.76151  |
| DO45109 | 4.356164 | 0 | 2.02795  | 7.142109 | 2.379651 | 1.269412 | 3.846672 | 1.540248 |
| DO45217 | 0.739726 | 1 | 2.588445 | 8.057175 | 1.68404  | 2.273486 | 3.449689 | 1.01108  |
| DO23550 | 2.712329 | 0 | 2.532084 | 6.738041 | 1.422215 | 1.870338 | 3.5984   | 0.183896 |
| DO45269 | 2.054795 | 0 | 3.39484  | 7.819835 | 1.339456 | 2.057933 | 3.373608 | 0.358629 |
| DO50800 | 1.39726  | 0 | 2.677612 | 7.342573 | 2.36233  | 2.270689 | 3.682897 | 3.086745 |
| DO48720 | 1.561644 | 0 | 3.004493 | 7.519838 | 2.77328  | 2.663467 | 3.538383 | 2.654686 |
| DO50791 | 1.315068 | 1 | 2.682809 | 7.027592 | 2.331735 | 1.889988 | 4.204766 | 0.611503 |
| DO45199 | 3.69863  | 0 | 2.330128 | 7.143392 | 1.562737 | 1.727857 | 3.673992 | 0.329281 |
| DO45299 | 3.945205 | 0 | 3.731242 | 7.828547 | 0.953178 | 2.022746 | 5.010676 | 6.542615 |
| DO50829 | 1.561644 | 0 | 3.61901  | 7.286672 | 4.377828 | 1.733446 | 4.896485 | 5.232369 |
| DO45105 | 4.60274  | 0 | 2.040216 | 8.033583 | 0.621704 | 1.397168 | 3.381458 | 0.156534 |
| DO50845 | 0.575342 | 0 | 2.507258 | 8.416213 | 2.265456 | 1.141612 | 4.075282 | 1.206478 |
| DO45197 | 3.205479 | 0 | 2.918086 | 6.648301 | 1.364007 | 2.299306 | 3.578295 | 0.696356 |
| DO45235 | 2.465753 | 0 | 2.520123 | 6.563429 | 1.049708 | 1.840201 | 4.132781 | 0.487672 |
| DO48672 | 1.232877 | 0 | 3.885135 | 7.457833 | 1.119678 | 1.851232 | 3.358457 | 0.581549 |
| DO45181 | 3.287671 | 0 | 2.551982 | 6.930715 | 2.471524 | 1.853974 | 3.499368 | 0.461755 |
| DO23525 | 2.876712 | 0 | 2.782927 | 8.710016 | 2.645026 | 1.782748 | 4.840674 | 0.349239 |
| DO45257 | 2.219178 | 0 | 2.174969 | 7.313809 | 1.0913   | 1.632437 | 3.963981 | 0.929424 |
| DO50803 | 1.479452 | 0 | 2.466981 | 7.527314 | 2.546041 | 1.957964 | 4.014341 | 0.623883 |
| DO23529 | 2.547945 | 0 | 3.564388 | 6.598289 | 2.878532 | 1.680028 | 3.297648 | 0.140433 |
| DO45115 | 2.30137  | 0 | 3.047548 | 7.377245 | 2.350551 | 1.869975 | 3.932906 | 0.119454 |
| DO45125 | 4.60274  | 0 | 2.126134 | 7.564704 | 0.778314 | 1.4372   | 4.048642 | 0.969127 |
| DO50809 | 1.972603 | 1 | 2.464297 | 7.539608 | 2.136959 | 1.917932 | 3.838825 | 1.44082  |
| DO45243 | 2.547945 | 0 | 2.61236  | 7.349976 | 1.490242 | 2.157235 | 3.897874 | 1.540168 |
| DO23508 | 1.068493 | 0 | 2.522559 | 8.049209 | 4.018452 | 1.421543 | 4.657217 | 0.474209 |
| DO23537 | 2.465753 | 1 | 3.080233 | 6.742859 | 0.507001 | 2.143705 | 3.485782 | 0.662161 |
| DO45251 | 2.465753 | 0 | 2.939659 | 7.925906 | 1.768856 | 2.460588 | 4.230129 | 1.424201 |
| DO48727 | 1.068493 | 1 | 2.687313 | 6.718292 | 0.251026 | 1.519602 | 3.546725 | 0.096982 |
| DO48719 | 1.890411 | 0 | 3.157353 | 7.270558 | 0.526601 | 1.336569 | 3.98518  | 0.221472 |
| DO45285 | 1.315068 | 0 | 2.376416 | 7.89889  | 2.683698 | 1.934289 | 5.770132 | 1.940958 |
| DO45191 | 3.287671 | 0 | 2.405879 | 6.995224 | 0.548866 | 1.823421 | 4.051775 | 0.485523 |
| DO48679 | 3.287671 | 0 | 2.485206 | 7.251632 | 1.848189 | 1.546559 | 4.133962 | 0.533475 |
| DO45261 | 2.712329 | 0 | 2.932773 | 7.17434  | 1.468421 | 1.779258 | 3.316947 | 1.101077 |
| DO48701 | 2.136986 | 0 | 2.639935 | 7.42774  | 1.217462 | 2.058939 | 6.332728 | 0.811827 |
| DO45213 | 3.287671 | 0 | 3.181042 | 7.476173 | 0.841762 | 2.248713 | 4.013536 | 1.452081 |
| DO48695 | 1.972603 | 0 | 2.494441 | 6.659923 | 0.607288 | 1.176828 | 3.601106 | 0.099872 |
| DO23552 | 2.219178 | 0 | 2.595783 | 6.46889  | 0.472561 | 1.609448 | 4.203526 | 0.081182 |
| DO45123 | 1.561644 | 1 | 2.794882 | 7.568151 | 1.565881 | 1.833745 | 3.221192 | 0.390845 |
| DO45131 | 0.986301 | 1 | 2.573036 | 7.94323  | 3.391936 | 2.298151 | 4.204295 | 0.044018 |
| DO23514 | 3.534247 | 0 | 3.471349 | 6.712039 | 3.410665 | 2.071689 | 3.83207  | 0.126836 |
| DO48746 | 1.561644 | 0 | 3.278643 | 6.63568  | 0.281494 | 1.832928 | 3.469175 | 0.103574 |
| DO45143 | 3.534247 | 0 | 2.512595 | 7.427372 | 1.34415  | 1.807973 | 3.959057 | 0.861428 |
| DO45187 | 3.452055 | 0 | 3.035404 | 7.107378 | 0.712092 | 2.17043  | 3.792673 | 0.477061 |
| DO50855 | 1.561644 | 0 | 3.06222  | 7.423526 | 1.422686 | 2.143833 | 4.228592 | 1.281563 |
| DO23549 | 2.712329 | 0 | 3.045047 | 8.030098 | 4.662505 | 1.919404 | 3.527408 | 0.125309 |
| DO23523 | 2.958904 | 0 | 3.294075 | 7.928363 | 3.942364 | 2.638635 | 4.726952 | 1.098234 |
| DO50805 | 1.890411 | 0 | 2.038258 | 7.873818 | 2.977056 | 1.53448  | 4.340642 | 1.49507  |
| DO45171 | 1.643836 | 0 | 2.463859 | 6.480023 | 2.062372 | 1.412041 | 3.453149 | 0.382828 |
| DO50783 | 1.315068 | 0 | 2.08692  | 7.069631 | 1.005175 | 1.38044  | 3.667461 | 0.167315 |
| DO45307 | 0.657534 | 1 | 2.811824 | 7.989232 | 4.666412 | 2.214437 | 4.50837  | 4.71223  |

Supplementary table 2

|          |          |   |          |          |          |          |          |          |
|----------|----------|---|----------|----------|----------|----------|----------|----------|
| DO45179  | 1.643836 | 0 | 2.354073 | 7.202854 | 0.788123 | 1.962277 | 3.485566 | 1.048969 |
| DO45135  | 3.863014 | 0 | 2.786954 | 7.988617 | 4.943104 | 2.288175 | 4.196893 | 1.806451 |
| DO48704  | 2.054795 | 0 | 2.981845 | 7.728358 | 0.834277 | 1.686441 | 3.620936 | 0.963512 |
| DO45163  | 2.630137 | 0 | 2.874036 | 6.978913 | 0.154118 | 1.563826 | 2.683792 | 0.077071 |
| DO50785  | 0.246575 | 1 | 3.168846 | 7.850254 | 1.463524 | 1.634808 | 3.228747 | 1.253385 |
| DO50808  | 1.561644 | 0 | 2.663966 | 7.842594 | 0.917631 | 1.653796 | 4.015392 | 0.569241 |
| DO48737  | 1.972603 | 0 | 3.126759 | 7.926246 | 3.787949 | 1.856005 | 4.48519  | 0.784687 |
| DO45149  | 3.452055 | 0 | 2.322993 | 7.973107 | 2.719266 | 1.002399 | 4.523917 | 0.255184 |
| DO45301  | 3.945205 | 1 | 2.248278 | 8.332121 | 1.917005 | 2.119957 | 4.78746  | 4.762996 |
| DO23543  | 2.794521 | 0 | 2.484378 | 6.891109 | 2.763685 | 2.259779 | 3.122972 | 0.628539 |
| DO227643 | 3.452055 | 0 | 2.305108 | 7.047488 | 0.881612 | 1.627517 | 3.315058 | 0.394132 |
| DO50789  | 1.561644 | 0 | 2.997763 | 7.382359 | 0.612891 | 1.59345  | 3.406228 | 0.368203 |
| DO23511  | 0.493151 | 1 | 1.886036 | 8.806613 | 1.352918 | 0.92361  | 4.847101 | 0.116455 |
| DO45233  | 2.465753 | 0 | 2.867611 | 7.118741 | 1.758311 | 2.288304 | 3.881619 | 1.893928 |
| DO50815  | 0.410959 | 0 | 2.690387 | 9.975686 | 2.793623 | 2.247146 | 4.363574 | 1.453904 |
| DO45111  | 4.356164 | 0 | 2.761508 | 5.589238 | 0.205543 | 1.999822 | 3.658413 | 0.181961 |
| DO45153  | 3.780822 | 0 | 2.934458 | 7.114018 | 1.954327 | 2.12392  | 4.05704  | 1.571987 |
| DO45229  | 2.712329 | 0 | 2.305729 | 7.161238 | 1.416082 | 1.683815 | 3.57753  | 0.933338 |
| DO45221  | 1.068493 | 1 | 2.958467 | 7.873801 | 3.177807 | 1.938836 | 4.615523 | 0.507653 |
| DO50802  | 2.547945 | 0 | 3.953483 | 7.568628 | 0.82536  | 1.552286 | 3.885883 | 0.901669 |
| DO45279  | 3.534247 | 0 | 3.140327 | 7.628713 | 1.333885 | 2.888842 | 4.598619 | 2.092756 |
| DO23510  | 2.383562 | 0 | 2.618092 | 7.714464 | 2.329849 | 2.25625  | 4.600324 | 1.2743   |
| DO45207  | 2.876712 | 0 | 2.759774 | 6.352513 | 0.798932 | 2.331366 | 3.692299 | 1.295712 |
| DO23512  | 3.452055 | 0 | 2.31556  | 7.710993 | 0.945436 | 1.832954 | 3.980714 | 0.261792 |
| DO50817  | 1.068493 | 0 | 2.304253 | 7.088565 | 1.277019 | 1.685337 | 3.638398 | 0.165985 |
| DO50818  | 1.39726  | 0 | 2.321775 | 7.028717 | 1.928321 | 1.394095 | 3.506293 | 0.103962 |
| DO23526  | 2.876712 | 0 | 2.658806 | 7.887484 | 1.891953 | 2.378991 | 4.212447 | 1.402083 |
| DO45093  | 1.972603 | 1 | 2.589499 | 8.104426 | 2.46865  | 1.603877 | 3.290293 | 0.135468 |
| DO48697  | 2.219178 | 1 | 2.62749  | 8.276656 | 3.65648  | 2.216399 | 3.924725 | 1.922017 |
| DO50804  | 1.972603 | 0 | 2.700448 | 7.206951 | 0.381184 | 1.600043 | 3.592314 | 0.149814 |
| DO45177  | 3.452055 | 0 | 2.963845 | 6.321135 | 1.590734 | 2.138583 | 3.755612 | 1.942318 |
| DO45265  | 2.794521 | 0 | 3.174351 | 7.311186 | 2.322785 | 2.150215 | 3.935845 | 0.116338 |
| DO23548  | 2.30137  | 0 | 2.764353 | 7.304261 | 2.056551 | 1.570156 | 3.400961 | 0.730298 |
| DO48716  | 1.972603 | 0 | 2.668054 | 7.71323  | 2.152044 | 1.873568 | 4.106645 | 0.407928 |
| DO45159  | 4.027397 | 0 | 2.56283  | 6.718853 | 1.862697 | 2.123644 | 3.592253 | 0.66808  |
| DO50822  | 1.39726  | 0 | 3.051882 | 6.823351 | 1.866866 | 1.488834 | 3.633688 | 0.108298 |
| DO45201  | 2.465753 | 0 | 2.510278 | 7.347179 | 1.381675 | 1.993787 | 3.630952 | 1.631484 |
| DO45303  | 2.712329 | 0 | 3.404912 | 8.431997 | 0.779944 | 2.18203  | 5.424631 | 1.559318 |
| DO45245  | 0.657534 | 1 | 2.424534 | 7.117542 | 0.556553 | 2.338919 | 4.288854 | 1.994154 |
| DO50857  | 0.575342 | 0 | 3.078193 | 6.8604   | 1.466638 | 1.803005 | 3.654996 | 0.093655 |
| DO50798  | 0.082192 | 1 | 2.709516 | 6.551058 | 0.765304 | 1.557048 | 3.642384 | 0.293399 |
| DO48681  | 2.465753 | 0 | 3.633553 | 6.548079 | 0.518507 | 2.374048 | 2.995689 | 0.18833  |
| DO227801 | 1.808219 | 0 | 2.417852 | 7.039982 | 1.213669 | 1.509603 | 3.500715 | 0.911376 |
| DO23528  | 2.794521 | 0 | 2.694483 | 6.961214 | 0.52403  | 2.154447 | 4.013225 | 0.205138 |
| DO45145  | 0.164384 | 1 | 3.514014 | 7.950449 | 3.256506 | 2.203199 | 4.654198 | 4.326112 |
| DO48693  | 2.465753 | 0 | 2.388099 | 7.25956  | 3.118693 | 1.527106 | 3.440177 | 0.51242  |
| DO45277  | 1.643836 | 0 | 3.078424 | 7.387342 | 4.169151 | 2.520691 | 4.086889 | 1.838428 |
| DO45287  | 1.068493 | 0 | 2.971311 | 7.710754 | 4.548831 | 2.715313 | 4.212891 | 3.205575 |
| DO45167  | 3.945205 | 1 | 2.135618 | 6.959993 | 0.86065  | 1.002844 | 3.306818 | 0.18842  |
| DO45227  | 2.794521 | 0 | 3.585662 | 6.45598  | 0.400532 | 1.809764 | 2.757251 | 0.097209 |
| DO48732  | 1.726027 | 0 | 3.071448 | 7.835509 | 2.15231  | 2.567791 | 4.236094 | 0.467846 |
| DO50799  | 1.479452 | 0 | 2.660543 | 6.328442 | 3.015382 | 2.074454 | 4.208838 | 1.202301 |
| DO50819  | 1.39726  | 0 | 2.672584 | 7.257371 | 3.459213 | 1.826496 | 4.499114 | 0.702    |
| DO48757  | 1.315068 | 0 | 3.218148 | 6.569201 | 1.789164 | 2.301686 | 4.152813 | 0.192617 |
| DO23533  | 2.465753 | 0 | 3.433095 | 7.432528 | 3.886113 | 1.434484 | 3.291648 | 0.126593 |
| DO23509  | 2.136986 | 1 | 2.690767 | 6.246549 | 0.151145 | 2.003482 | 3.737052 | 0.276444 |
| DO23546  | 2.876712 | 0 | 2.731444 | 8.068331 | 1.940468 | 1.818174 | 3.588788 | 0.639416 |
| DO23517  | 3.287671 | 0 | 2.447625 | 7.031937 | 0.423191 | 1.350542 | 3.106562 | 0.235331 |

Supplementary table 2

| riskScore | risk |
|-----------|------|
| 2.707689  | low  |
| 2.655549  | low  |
| 3.364557  | high |
| 2.698724  | low  |
| 3.244636  | high |
| 3.17835   | high |
| 3.724764  | high |
| 3.480099  | high |
| 3.531733  | high |
| 3.210456  | high |
| 3.009151  | high |
| 3.416694  | high |
| 3.353941  | high |
| 3.472742  | high |
| 2.745181  | low  |
| 2.989491  | high |
| 2.689379  | low  |
| 3.288139  | high |
| 3.848691  | high |
| 3.2241    | high |
| 3.314276  | high |
| 3.472973  | high |
| 3.337533  | high |
| 3.640385  | high |
| 3.149267  | high |
| 3.295362  | high |
| 3.023448  | high |
| 3.723979  | high |
| 3.799208  | high |
| 2.559537  | low  |
| 3.216753  | high |
| 2.868187  | low  |
| 3.1487    | high |
| 3.606682  | high |
| 2.866803  | low  |
| 3.112112  | high |
| 3.092497  | high |
| 3.627599  | high |
| 3.454028  | high |
| 3.269114  | high |
| 3.128366  | high |
| 3.304335  | high |
| 3.349134  | high |
| 3.744974  | high |
| 2.825308  | low  |
| 3.284991  | high |
| 2.748277  | low  |
| 3.333761  | high |
| 3.650328  | high |
| 2.709783  | low  |
| 3.038449  | high |
| 3.090931  | high |
| 2.847323  | low  |
| 4.058194  | high |
| 3.85532   | high |
| 3.333102  | high |
| 2.934984  | low  |

Supplementary table 2

3.277102 high  
2.311193 low  
3.661762 high  
3.261545 high  
2.996881 high  
2.585009 low  
3.158234 high  
3.622613 high  
2.863242 low  
2.716989 low  
2.470065 low  
3.219891 high  
2.850467 low  
2.563872 low  
3.071437 high  
3.13784 high  
3.219054 high  
4.102728 high  
3.59232 high  
3.823868 high  
3.526772 high  
2.982895 low  
2.650752 low  
3.489856 high  
3.21044 high  
2.949962 low  
2.974914 low  
3.318867 high  
3.28982 high  
3.510998 high  
2.472678 low  
3.104386 high  
2.957379 low  
3.140364 high  
3.210091 high  
3.391347 high  
3.342067 high  
3.727504 high  
2.860279 low  
2.96385 low  
3.744084 high  
2.838701 low  
3.358596 high  
3.324735 high  
3.711447 high  
2.81106 low  
2.886114 low  
3.691943 high  
3.159467 high  
3.398387 high  
3.460108 high  
3.474871 high  
2.722217 low  
2.895034 low  
3.119392 high  
3.368728 high  
3.071867 high  
3.403765 high

Supplementary table 2



2.692315 low  
3.258564 high  
3.052649 high  
3.044349 high  
3.468665 high  
3.190674 high  
2.850724 low  
3.453161 high  
2.829418 low  
3.297169 high  
2.901526 low  
3.428027 high  
3.380742 high  
3.626896 high  
3.159844 high  
2.893813 low  
3.903443 high  
3.965542 high  
2.753294 low  
3.185715 high  
3.13707 high  
2.874292 low  
3.482309 high  
3.046369 high  
3.528654 high  
2.848734 low  
3.193656 high  
3.32321 high  
3.308209 high  
2.808967 low  
3.17234 high  
3.191866 high  
3.364325 high  
3.086414 high  
3.522509 high  
2.754647 low  
3.041676 high  
3.41498 high  
2.85137 low  
2.996291 high  
3.129496 high  
3.298961 high  
3.379783 high  
2.636737 low  
2.763437 low  
3.131295 high  
3.448603 high  
3.484526 high  
3.020476 high  
3.050083 high  
3.172425 high  
3.367261 high  
3.629052 high  
3.918643 high  
3.110143 high  
2.790398 low  
2.654021 low  
3.88408 high

2.911026 low  
3.762253 high  
3.176698 high  
2.808345 low  
3.301242 high  
3.091941 high  
3.637242 high  
3.04083 high  
3.476606 high  
3.116261 high  
2.758333 low  
3.037228 high  
2.896294 low  
3.313407 high  
3.854745 high  
2.697541 low  
3.315741 high  
2.885634 low  
3.523215 high  
3.481747 high  
3.652209 high  
3.396654 high  
3.016434 high  
2.969885 low  
2.827785 low  
2.809474 low  
3.406348 high  
3.180399 high  
3.602095 high  
2.881306 low  
3.151863 high  
3.402182 high  
3.090411 high  
3.237816 high  
3.030448 high  
3.059631 high  
3.093757 high  
3.708126 high  
3.081721 high  
3.107961 high  
2.806923 low  
3.248145 high  
2.839823 low  
3.005013 high  
3.982644 high  
3.033023 high  
3.732525 high  
3.903088 high  
2.53027 low  
3.056716 high  
3.570998 high  
3.164046 high  
3.315472 high  
3.288219 high  
3.463961 high  
2.792889 low  
3.265617 high  
2.678975 low

Supplementary table 2

**Supplementary Table 3: Supplementary Table 3 is a table of immune cell infiltration in gastric cancer calculated**

| Mixture | B cells nai | B cells mei | Plasma cel | T cells CD4 | T cells CD8 | T cells CD4 | T cells CD4 | T cells CD4 | T cells folli |
|---------|-------------|-------------|------------|-------------|-------------|-------------|-------------|-------------|---------------|
| TCGA-DD | 0.047045    | 0           | 0.003945   | 0.073535    | 0           | 0.113793    | 0.00573     |             | 0             |
| TCGA-DD | 0.057276    | 0           | 0.054572   | 0.071352    | 0           | 0.070822    | 0.004069    | 0.00179     |               |
| TCGA-DD | 0.025561    | 0           | 0.002836   | 0.102632    | 0           | 0.103564    | 0           | 0.018395    |               |
| TCGA-DD | 0.079387    | 0           | 0.005609   | 0.175137    | 0           | 0.088989    | 0           | 0.022831    |               |
| TCGA-FV | 0.004272    | 0           | 0.001235   | 0           | 0           | 0.110289    | 0           | 0.035009    |               |
| TCGA-DD | 0.036722    | 0           | 0.001985   | 0.029697    | 0           | 0.141234    | 0           | 0           |               |
| TCGA-DD | 0.108351    | 0           | 0.047354   | 0.053397    | 0           | 0.096217    | 0           | 0.025693    |               |
| TCGA-EP | 0.11174     | 0           | 0.065843   | 0.052874    | 0           | 0.137704    | 0           | 0.027418    |               |
| TCGA-EP | 0.150569    | 0           | 0.016659   | 0.119326    | 0           | 0.071433    | 0           | 0.022287    |               |
| TCGA-DD | 0.14185     | 0           | 0.029354   | 0.071154    | 0           | 0.084316    | 0           | 0.016307    |               |
| TCGA-BC | 0.036779    | 0           | 0.009883   | 0.083289    | 0           | 0.123584    | 0           | 0.010714    |               |
| TCGA-BC | 0.07053     | 0           | 0.005569   | 0.114108    | 0           | 0.047361    | 0           | 0.01764     |               |
| TCGA-DD | 0.085005    | 0           | 0.012868   | 0.175808    | 0           | 0.1507      | 0           | 0.029837    |               |
| TCGA-G3 | 0.090041    | 0           | 0.03258    | 0.22088     | 0           | 0.207424    | 0           | 0.008581    |               |
| TCGA-DD | 0.059171    | 0           | 0.007053   | 0.208446    | 0           | 0.21107     | 0.009248    | 0.026133    |               |
| TCGA-DD | 0.057378    | 0           | 0.006953   | 0.146023    | 0           | 0.16119     | 0           | 0.014677    |               |
| TCGA-DD | 0.078564    | 0           | 0.007783   | 0.045242    | 0           | 0.183698    | 0           | 0.00793     |               |
| TCGA-DD | 0.053168    | 0           | 0.007225   | 0.088022    | 0           | 0.194795    | 0           | 0.002589    |               |
| TCGA-EP | 0.017832    | 0           | 0.016397   | 0.178304    | 0           | 0.29077     | 0           | 0.025815    |               |
| TCGA-DD | 0.093065    | 0           | 0.006065   | 0.159036    | 0           | 0.212929    | 0           | 0.027731    |               |
| TCGA-DD | 0.055364    | 0           | 0.131154   | 0.171756    | 0           | 0.064239    | 0.022284    | 0.019572    |               |
| TCGA-BD | 0.067891    | 0           | 0          | 0.090788    | 0           | 0.248353    | 0           | 0           |               |
| TCGA-DD | 0.078383    | 0           | 0.012353   | 0.168524    | 0           | 0.152983    | 0           | 0           |               |
| TCGA-DD | 0.08697     | 0           | 0.024745   | 0.104641    | 0           | 0.110874    | 0           | 0.00561     |               |
| TCGA-BC | 0.054527    | 0           | 0.002254   | 0.054875    | 0           | 0.146247    | 0           | 0           |               |
| TCGA-DD | 0.053404    | 0           | 0          | 0.088025    | 0           | 0.124629    | 0           | 0.015111    |               |
| TCGA-DD | 0.073434    | 0           | 0.01246    | 0.119068    | 0           | 0.174406    | 0.001033    | 0           |               |
| TCGA-DD | 0.016847    | 0.042645    | 0.008381   | 0.080263    | 0           | 0.1768      | 0           | 0.017012    |               |
| TCGA-DD | 0.061998    | 0           | 0.016373   | 0.093913    | 0           | 0.12844     | 0.007498    | 0           |               |
| TCGA-FV | 0.087773    | 0           | 0.00778    | 0.155132    | 0           | 0.127361    | 0           | 0.007231    |               |
| TCGA-DD | 0.060144    | 0           | 0.002136   | 0.101821    | 0           | 0.276117    | 0.001153    | 0           |               |
| TCGA-BC | 0.101535    | 0           | 0.005673   | 0.098001    | 0           | 0.10383     | 0           | 0.039941    |               |
| TCGA-FV | 0.094126    | 0           | 0.00047    | 0.05341     | 0           | 0.176113    | 0           | 0           |               |
| TCGA-FV | 0.068095    | 0           | 0          | 0.169383    | 0           | 0.302314    | 0.004985    | 0.019884    |               |
| TCGA-DD | 0.23755     | 0           | 0.036776   | 0.097001    | 0           | 0.089667    | 0           | 0.042173    |               |
| TCGA-BC | 0.075717    | 0           | 0.002436   | 0.065314    | 0           | 0.133146    | 0           | 0.038644    |               |
| TCGA-FV | 0.014049    | 0           | 0          | 0.197108    | 0           | 0.153894    | 0           | 0.004767    |               |
| TCGA-BC | 0.096886    | 0           | 0.012064   | 0.069498    | 0           | 0.249219    | 0.031974    | 0           |               |
| TCGA-BC | 0.212137    | 0           | 0.074941   | 0.064471    | 0           | 0.104672    | 0           | 0.025689    |               |
| TCGA-DD | 0.032146    | 0           | 0.030794   | 0.147086    | 0           | 0.127678    | 0           | 0           |               |
| TCGA-BC | 0.047077    | 0           | 0          | 0.066573    | 0           | 0.191942    | 0           | 0           |               |
| TCGA-BC | 0.053273    | 0           | 0.003284   | 0.110906    | 0           | 0.212248    | 0           | 0           |               |
| TCGA-DD | 0.119169    | 0           | 0.031841   | 0.120704    | 0           | 0.264657    | 0           | 0           |               |
| TCGA-DD | 0.098692    | 0           | 0          | 0.218736    | 0           | 0.216054    | 0.002019    | 0           |               |
| TCGA-BC | 0.019407    | 0           | 0.004536   | 0.044073    | 0           | 0.194017    | 0           | 0.005642    |               |
| TCGA-DD | 0.056792    | 0           | 0.030514   | 0.152654    | 0           | 0.217278    | 0.011719    | 0.008922    |               |
| TCGA-BD | 0.114469    | 0           | 0.016041   | 0.135136    | 0           | 0.312654    | 0.007718    | 0           |               |
| TCGA-DD | 0.073831    | 0           | 0.073103   | 0.102396    | 0           | 0.149154    | 0           | 0.012169    |               |
| TCGA-ES | 0.073408    | 0           | 0.0071     | 0.110174    | 0           | 0.172309    | 0           | 0.040245    |               |
| TCGA-DD | 0.108096    | 0           | 0.097198   | 0.138584    | 0           | 0.078009    | 0           | 0.008921    |               |
| TCGA-DD | 0.014686    | 0           | 0.005775   | 0.235568    | 0           | 0.2224      | 0           | 0.002918    |               |
| TCGA-CC | 0           | 0           | 0.005296   | 0.445347    | 0           | 0.009494    | 0.048321    | 0.026578    |               |
| TCGA-DD | 0.046591    | 0           | 0          | 0.187018    | 0           | 0.26897     | 0.001325    | 0           |               |
| TCGA-G3 | 0.048068    | 0           | 0.107718   | 0.278067    | 0           | 0.025542    | 0.029217    | 0.07208     |               |
| TCGA-UB | 0.051775    | 0           | 0.005463   | 0.111856    | 0           | 0.271311    | 0           | 0.01338     |               |
| TCGA-UB | 0.158739    | 0           | 0.021309   | 0.217241    | 0           | 0.138131    | 0.015966    | 0.018712    |               |
| TCGA-BC | 0.01364     | 0.021637    | 0          | 0.042862    | 0           | 0.160141    | 0           | 0           |               |

|          |          |          |          |          |   |          |          |          |
|----------|----------|----------|----------|----------|---|----------|----------|----------|
| TCGA-BC- | 0.000255 | 0        | 0.002983 | 0.09675  | 0 | 0.181826 | 0.001307 | 0.013508 |
| TCGA-BC- | 0.007979 | 0        | 0        | 0        | 0 | 0.319213 | 0        | 0        |
| TCGA-FV- | 0.01316  | 0        | 0        | 0.051543 | 0 | 0.100131 | 0.012001 | 0.012525 |
| TCGA-CC- | 0.001059 | 0.00831  | 0.002667 | 0.045997 | 0 | 0.29377  | 0        | 0.009365 |
| TCGA-WC  | 0        | 0.039474 | 0.037106 | 0.076858 | 0 | 0.128651 | 0        | 0.065249 |
| TCGA-ED- | 0.097846 | 0        | 0.047935 | 0.042129 | 0 | 0.111625 | 0        | 0        |
| TCGA-DD  | 0.000586 | 0.000269 | 0        | 0.037935 | 0 | 0.207883 | 0        | 0        |
| TCGA-DD  | 0.06657  | 0        | 0.004236 | 0.115588 | 0 | 0.161693 | 0        | 0.000342 |
| TCGA-MR  | 0.048238 | 0        | 0.001436 | 0.140846 | 0 | 0.287017 | 0        | 0.004993 |
| TCGA-QA  | 0.087555 | 0        | 0        | 0.083642 | 0 | 0.240017 | 0        | 0.076123 |
| TCGA-CC- | 0        | 0.053322 | 0.000586 | 0.058698 | 0 | 0.134153 | 0        | 0.007837 |
| TCGA-FV- | 0.007615 | 0.008175 | 0.00023  | 0.14724  | 0 | 0.073304 | 0.015693 | 0.032676 |
| TCGA-DD  | 0.058044 | 0        | 0.007729 | 0.047735 | 0 | 0.227506 | 0.016432 | 0        |
| TCGA-CC- | 0.004561 | 0.00282  | 0.001436 | 0.059135 | 0 | 0.168984 | 0.018502 | 0.002705 |
| TCGA-EP- | 0.027514 | 0        | 0.014254 | 0.149303 | 0 | 0.260268 | 0        | 0.034724 |
| TCGA-G3- | 0.012944 | 0        | 0        | 0.310511 | 0 | 0.051574 | 0.056144 | 0        |
| TCGA-DD  | 0.135719 | 0        | 0        | 0.175138 | 0 | 0.307713 | 0.000621 | 0        |
| TCGA-G3- | 0.052214 | 0        | 0.001048 | 0.310993 | 0 | 0.089459 | 0.026708 | 0        |
| TCGA-DD  | 0.000356 | 0.004741 | 0.009823 | 0        | 0 | 0.255792 | 0        | 0.013707 |
| TCGA-5C- | 0.043954 | 0        | 0.01027  | 0.070003 | 0 | 0.375383 | 0        | 0        |
| TCGA-FV- | 0.053003 | 0        | 0.000384 | 0.105807 | 0 | 0.262938 | 0.013871 | 0.047018 |
| TCGA-DD  | 0.009981 | 0        | 0.005849 | 0.113371 | 0 | 0.369974 | 0        | 0        |
| TCGA-DD  | 0        | 0.010715 | 0.004824 | 0.068213 | 0 | 0.165862 | 0        | 0        |
| TCGA-G3- | 0.02633  | 0        | 0.006056 | 0.048866 | 0 | 0.137782 | 0.010179 | 0.015397 |
| TCGA-MI- | 0.103278 | 0        | 0.037259 | 0.137134 | 0 | 0.269313 | 0.002308 | 0.00381  |
| TCGA-DD  | 0.015957 | 0.002829 | 0        | 0.049598 | 0 | 0.272461 | 0        | 0        |
| TCGA-CC- | 0.021722 | 0        | 0        | 0.18301  | 0 | 0.115909 | 0.010811 | 0.002054 |
| TCGA-2Y- | 0.005135 | 0.002908 | 0.024725 | 0.326831 | 0 | 0.007447 | 0.055786 | 0.03869  |
| TCGA-ES- | 0.019252 | 0.001783 | 0.027285 | 0.059823 | 0 | 0.151547 | 0        | 0.083705 |
| TCGA-DD  | 0.025997 | 0        | 0        | 0.058831 | 0 | 0.296533 | 0.001849 | 0        |
| TCGA-G3- | 0.102304 | 0        | 0.018765 | 0.187687 | 0 | 0.083365 | 0        | 0        |
| TCGA-DD  | 0.047133 | 0        | 0.015632 | 0.120637 | 0 | 0.137009 | 0.019706 | 0.028421 |
| TCGA-DD  | 0        | 0.008038 | 0.017359 | 0.098501 | 0 | 0.185716 | 0        | 0        |
| TCGA-DD  | 0.013078 | 0        | 0.001895 | 0.185217 | 0 | 0.120384 | 0        | 0        |
| TCGA-DD  | 0.01699  | 0        | 0        | 0.028315 | 0 | 0.394082 | 0        | 0        |
| TCGA-ED- | 0.034999 | 0        | 0        | 0.148655 | 0 | 0.179105 | 0        | 0        |
| TCGA-HP- | 0.058337 | 0        | 0.006222 | 0.049841 | 0 | 0.265829 | 0        | 0.008176 |
| TCGA-DD  | 0.001271 | 0        | 0        | 0.015761 | 0 | 0.095867 | 0        | 0        |
| TCGA-DD  | 0.020143 | 0        | 0        | 0.020767 | 0 | 0.357288 | 0        | 0        |
| TCGA-BC- | 0        | 0.012858 | 0        | 0.021274 | 0 | 0.131837 | 0        | 0.047697 |
| TCGA-LG- | 0        | 0        | 0.002476 | 0.025367 | 0 | 0.269264 | 0        | 0        |
| TCGA-DD  | 0.000432 | 0.011486 | 0        | 0.066691 | 0 | 0.322704 | 0        | 0        |
| TCGA-DD  | 0.046994 | 0        | 0.022451 | 0.253471 | 0 | 0.076344 | 0.02438  | 0.047162 |
| TCGA-DD  | 0.068599 | 0        | 0        | 0.040458 | 0 | 0.389209 | 0        | 0        |
| TCGA-BC- | 0.108522 | 0        | 0.019702 | 0.49917  | 0 | 0        | 0.145336 | 0.040261 |
| TCGA-DD  | 0.128812 | 0        | 0.008729 | 0.098743 | 0 | 0.156958 | 0        | 0.01953  |
| TCGA-DD  | 0.038044 | 0        | 0.00044  | 0.130025 | 0 | 0.036865 | 0        | 0.022669 |
| TCGA-KR- | 0.040229 | 0        | 0.00407  | 0.411061 | 0 | 0        | 0.11206  | 0.030314 |
| TCGA-ED- | 0.036948 | 0        | 0.002786 | 0.069455 | 0 | 0.162253 | 0        | 0.004992 |
| TCGA-DD  | 0.160415 | 0        | 0.045645 | 0.107934 | 0 | 0.226621 | 0.009659 | 0.010839 |
| TCGA-BW  | 0.045631 | 0        | 0.042731 | 0.070659 | 0 | 0.283204 | 0        | 0.030057 |
| TCGA-DD  | 0.152469 | 0        | 0.027725 | 0.08697  | 0 | 0.111986 | 0.007344 | 0        |
| TCGA-GJ- | 0.059313 | 0        | 0.000271 | 0.057005 | 0 | 0.150162 | 0        | 0.018748 |
| TCGA-DD  | 0.079253 | 0        | 0.006163 | 0.142972 | 0 | 0.194359 | 0.046188 | 0.014038 |
| TCGA-UB- | 0.054501 | 0        | 0.006065 | 0.045529 | 0 | 0.145403 | 0        | 0        |
| TCGA-ES- | 0.012858 | 0        | 0.005366 | 0.057891 | 0 | 0.213612 | 0        | 0        |
| TCGA-G3- | 0.062406 | 0        | 0.004317 | 0.095166 | 0 | 0.155669 | 0        | 0        |
| TCGA-FV- | 0.001611 | 0        | 0.000371 | 0.073729 | 0 | 0.352141 | 0        | 0.001985 |

Supplementary table 3

|          |          |          |          |          |         |          |          |          |
|----------|----------|----------|----------|----------|---------|----------|----------|----------|
| TCGA-BW  | 0.064875 | 0        | 0        | 0.33071  | 0       | 0.039802 | 0.10172  | 0.064468 |
| TCGA-2Y- | 0.039862 | 0        | 0.003823 | 0.135435 | 0       | 0.017695 | 0        | 0.060378 |
| TCGA-4R- | 0.081671 | 0        | 0.010793 | 0.026915 | 0       | 0.113605 | 0        | 0.057532 |
| TCGA-DD  | 0.0148   | 0        | 0.0033   | 0.084386 | 0       | 0.412286 | 0.025413 | 0.006503 |
| TCGA-RC- | 0.022934 | 0        | 0.005971 | 0.048334 | 0       | 0.347178 | 0        | 0.003823 |
| TCGA-2Y- | 0.007809 | 0        | 0        | 0.333928 | 0       | 0.092814 | 0.059042 | 0.054757 |
| TCGA-DD  | 0.029133 | 0        | 0.002792 | 0.062151 | 0       | 0.310841 | 0        | 0        |
| TCGA-G3- | 0.085821 | 0        | 0.009012 | 0.088925 | 0       | 0.219927 | 0.013054 | 0        |
| TCGA-5R- | 0.000957 | 0        | 0.000538 | 0.234144 | 0       | 0.064021 | 0.007203 | 0.01552  |
| TCGA-ED- | 0        | 0.00895  | 0.017389 | 0.104457 | 0       | 0.211449 | 0.000951 | 0.019438 |
| TCGA-DD  | 0.029183 | 0        | 0.007452 | 0.284031 | 0       | 0.055695 | 0.037007 | 0.100201 |
| TCGA-BC- | 0.016008 | 0.000624 | 0        | 0.222013 | 0       | 0.150692 | 0        | 0.016344 |
| TCGA-CC- | 0.012777 | 0        | 0.001758 | 0.101021 | 0       | 0.233956 | 0        | 0.011789 |
| TCGA-DD  | 0        | 0        | 0.008393 | 0.244208 | 0       | 0.180799 | 0.029097 | 0        |
| TCGA-WX  | 0.080209 | 0        | 0.005956 | 0.040053 | 0       | 0.298486 | 0.002055 | 0        |
| TCGA-PD- | 0        | 0.001646 | 0.002499 | 0.015151 | 0       | 0.106293 | 0.000405 | 0        |
| TCGA-YA- | 0.00039  | 0.007517 | 0.00096  | 0.047781 | 0       | 0.121764 | 0        | 0        |
| TCGA-5R- | 0.080959 | 0        | 0.012932 | 0.066918 | 0       | 0.309344 | 0.00302  | 0        |
| TCGA-DD  | 0.073369 | 0        | 0        | 0.022098 | 0       | 0.165125 | 0        | 0.018661 |
| TCGA-CC- | 0.008132 | 0.051624 | 0        | 0.051949 | 0       | 0.283512 | 0        | 0        |
| TCGA-BW  | 0.050431 | 0        | 0.011773 | 0.149699 | 0       | 0.176624 | 0        | 0        |
| TCGA-G3- | 0.065797 | 0        | 0.012238 | 0.247014 | 0       | 0.085041 | 0        | 0.124504 |
| TCGA-DD  | 0.050027 | 0        | 0.017406 | 0.014013 | 0       | 0.246652 | 0.005337 | 0.022841 |
| TCGA-DD  | 0.011237 | 0        | 0.003768 | 0.318942 | 0       | 0.216212 | 0.014204 | 0.017911 |
| TCGA-DD  | 0.00579  | 0        | 0.019271 | 0.052874 | 0       | 0.149404 | 0        | 0        |
| TCGA-DD  | 0.013978 | 0        | 0        | 0.110805 | 0       | 0.141113 | 0        | 0        |
| TCGA-UB- | 0.075673 | 0        | 0.004529 | 0.093612 | 0       | 0.215379 | 0        | 0.007099 |
| TCGA-DD  | 0.007917 | 0        | 0.007631 | 0.302005 | 0       | 0.058638 | 0.022335 | 0.076523 |
| TCGA-DD  | 0.034009 | 0        | 0        | 0.037617 | 0       | 0.145106 | 0        | 0        |
| TCGA-FV- | 0.017898 | 0        | 0        | 0.083383 | 0       | 0.348539 | 0        | 0        |
| TCGA-DD  | 0.064216 | 0        | 0.032403 | 0.226875 | 0       | 0.263604 | 0.001701 | 0        |
| TCGA-MI- | 0.000155 | 0        | 0.003884 | 0.238602 | 0       | 0.156587 | 0.035467 | 0        |
| TCGA-UB- | 0        | 0.011934 | 0.009021 | 0.074118 | 0       | 0.109773 | 0        | 0        |
| TCGA-FV- | 0.010742 | 0        | 0.03446  | 0.446614 | 0       | 0        | 0.026327 | 0.094752 |
| TCGA-DD  | 0.172077 | 0        | 0.01563  | 0.039389 | 0       | 0.160313 | 0        | 0.088388 |
| TCGA-DD  | 0.004294 | 0        | 0        | 0.012537 | 0       | 0.128572 | 0        | 0.004412 |
| TCGA-K7- | 0.058746 | 0        | 0.097511 | 0.400012 | 0       | 0        | 0.053017 | 0.08621  |
| TCGA-XR- | 0.040736 | 0        | 0.003238 | 0.334341 | 0       | 0        | 0.114931 | 0.01165  |
| TCGA-DD  | 0.026428 | 0        | 0.00836  | 0.204118 | 0       | 0.250625 | 0        | 0.030296 |
| TCGA-CC- | 0.023791 | 0        | 0.007242 | 0.178766 | 0       | 0.174758 | 0        | 0.088374 |
| TCGA-KR- | 0        | 0.001544 | 0.006374 | 0.422655 | 0       | 0        | 0.006718 | 0.077069 |
| TCGA-G3- | 0.056044 | 0        | 0.006349 | 0.082581 | 0       | 0.302591 | 0.046477 | 0.048572 |
| TCGA-K7- | 0.066851 | 0        | 0.005378 | 0.019412 | 0       | 0.155003 | 0.001384 | 0.054602 |
| TCGA-DD  | 0.113902 | 0        | 0.000911 | 0        | 0       | 0.08574  | 0        | 0.002285 |
| TCGA-BC- | 0.05201  | 0        | 0        | 0.000635 | 0       | 0.332209 | 0        | 0        |
| TCGA-BC- | 0.092537 | 0        | 0.002369 | 0.013804 | 0       | 0.047056 | 0        | 0.116191 |
| TCGA-UB- | 0.02583  | 0        | 0.004595 | 0.067856 | 0       | 0.237199 | 0        | 0        |
| TCGA-DD  | 0.052757 | 0        | 0        | 0.008341 | 0       | 0.148791 | 0.020093 | 0        |
| TCGA-ZP- | 0.083027 | 0        | 0.003202 | 0.038173 | 0       | 0.180332 | 0        | 0.03513  |
| TCGA-DD  | 0.103826 | 0        | 0.038147 | 0.091779 | 0       | 0.147657 | 0        | 0.005809 |
| TCGA-CC- | 0.02043  | 0        | 0.005254 | 0.013178 | 0.02746 | 0        | 0        | 0.038265 |
| TCGA-RC- | 0.003601 | 0        | 0.003744 | 0.054139 | 0       | 0        | 0        | 0        |
| TCGA-ED- | 0.055969 | 0        | 0.005357 | 0.088526 | 0       | 0.12522  | 0        | 0        |
| TCGA-2Y- | 0.011605 | 0        | 0.000849 | 0.009925 | 0       | 0.180976 | 0        | 0        |
| TCGA-DD  | 0.028648 | 0        | 0        | 0.226135 | 0       | 0.130696 | 0        | 0        |
| TCGA-DD  | 0.006585 | 0        | 0.149639 | 0.433456 | 0       | 0        | 0.079949 | 0.059828 |
| TCGA-DD  | 0.046475 | 0        | 0        | 0.110586 | 0       | 0.303338 | 0        | 0        |
| TCGA-MI- | 0.000329 | 0.003396 | 0        | 0.191119 | 0       | 0.149425 | 0        | 0.019383 |

Supplementary table 3



|          |          |          |          |          |   |          |          |          |
|----------|----------|----------|----------|----------|---|----------|----------|----------|
| TCGA-FV- | 0.003449 | 0.003902 | 0        | 0.010902 | 0 | 0.217356 | 0        | 0.005907 |
| TCGA-2Y- | 0.038821 | 0        | 0.010499 | 0.17937  | 0 | 0.19033  | 0.009976 | 0.001243 |
| TCGA-CC- | 0.047054 | 0        | 0        | 0.05902  | 0 | 0.21748  | 0        | 0        |
| TCGA-DD  | 0.047588 | 0        | 0.000424 | 0.080343 | 0 | 0.244406 | 0.013424 | 0.006468 |
| TCGA-BC- | 0        | 0.007584 | 0.004471 | 0.103636 | 0 | 0.197639 | 0        | 0.002206 |
| TCGA-G3- | 0.039181 | 0        | 0        | 0.073455 | 0 | 0.23444  | 0.034425 | 0        |
| TCGA-CC- | 0.025741 | 0        | 0.001102 | 0.158422 | 0 | 0.113215 | 0.089539 | 0.056713 |
| TCGA-2Y- | 0.036434 | 0        | 0.001381 | 0.085135 | 0 | 0.185345 | 0        | 0        |
| TCGA-ED- | 0.074392 | 0        | 0.160869 | 0.121709 | 0 | 0.136065 | 0        | 0.021084 |
| TCGA-CC- | 0.048611 | 0        | 0.028164 | 0.051997 | 0 | 0.141594 | 0.019911 | 0.019443 |
| TCGA-DD  | 0.082779 | 0        | 0.053928 | 0.18923  | 0 | 0.110317 | 0.016941 | 0.082941 |
| TCGA-BD- | 0.086013 | 0.079654 | 0        | 0.095826 | 0 | 0.245993 | 0        | 0.06137  |
| TCGA-DD  | 0.010749 | 0        | 0.004452 | 0.307086 | 0 | 0        | 0.070381 | 0.013487 |
| TCGA-DD  | 0        | 0.004021 | 0        | 0.135113 | 0 | 0.180592 | 0        | 0.018842 |
| TCGA-DD  | 0.024335 | 0        | 0.004037 | 0.275104 | 0 | 0.12692  | 0.041687 | 0.061874 |
| TCGA-DD  | 0.046895 | 0.007854 | 0.012822 | 0.16588  | 0 | 0.196684 | 0        | 0.023704 |
| TCGA-CC- | 0.02009  | 0        | 0.017747 | 0.217754 | 0 | 0.242042 | 0        | 0.014051 |
| TCGA-DD  | 0.056992 | 0        | 0.006559 | 0.075234 | 0 | 0.239834 | 0        | 0.041442 |
| TCGA-ZS- | 0.068962 | 0        | 0.003026 | 0.066644 | 0 | 0.353141 | 0        | 0.014241 |
| TCGA-NI- | 0.146754 | 0        | 0.02288  | 0.118012 | 0 | 0.217083 | 0        | 0        |
| TCGA-DD  | 0.018541 | 0        | 0        | 0.27413  | 0 | 0.337343 | 0        | 0        |
| TCGA-G3- | 0.008177 | 0        | 0.006175 | 0.247663 | 0 | 0.142524 | 0        | 0.042968 |
| TCGA-MI- | 0.038803 | 0        | 0        | 0.023939 | 0 | 0.19101  | 0.006993 | 0        |
| TCGA-CC- | 0.033042 | 0        | 0        | 0        | 0 | 0.233287 | 0        | 0.000252 |
| TCGA-G3- | 0.044824 | 0.003853 | 0        | 0.188027 | 0 | 0.172274 | 0.011581 | 0.031286 |
| TCGA-ZS- | 0.080972 | 0        | 0.020453 | 0.079137 | 0 | 0.088572 | 0        | 0.084265 |
| TCGA-DD  | 0        | 0        | 0        | 0.104944 | 0 | 0.127292 | 0        | 0        |
| TCGA-RC- | 0.024323 | 0        | 0.001695 | 0.094416 | 0 | 0.181133 | 0        | 0.060241 |
| TCGA-DD  | 0        | 0.028716 | 0.004769 | 0.477824 | 0 | 0        | 0.107388 | 0.021687 |
| TCGA-CC- | 0        | 0.011989 | 0.003948 | 0.09439  | 0 | 0.227184 | 0        | 6.53E-05 |
| TCGA-DD  | 0.00238  | 0.022338 | 0.015698 | 0.118863 | 0 | 0.139784 | 0.01654  | 0.023685 |
| TCGA-DD  | 0.038998 | 0        | 0.006386 | 0.067823 | 0 | 0.295671 | 0        | 0        |
| TCGA-2Y- | 0        | 0        | 0.026955 | 0.264803 | 0 | 0.073049 | 0        | 0.084163 |
| TCGA-DD  | 0.057184 | 0        | 0        | 0.155134 | 0 | 0.169935 | 0.006754 | 0.03121  |
| TCGA-DD  | 0.027559 | 0        | 0.007688 | 0.181056 | 0 | 0.269987 | 0.009732 | 0.017526 |
| TCGA-2Y- | 0.021994 | 0.013638 | 0        | 0.064687 | 0 | 0.485251 | 0        | 0        |
| TCGA-RC- | 0.066274 | 0        | 0        | 0.119856 | 0 | 0.184061 | 0.012117 | 0.07866  |
| TCGA-G3- | 0.004309 | 0        | 0        | 0.058826 | 0 | 0.187069 | 0        | 0        |
| TCGA-BC- | 0.010488 | 0        | 0.009647 | 0.140045 | 0 | 0.284788 | 0.005023 | 0.020827 |
| TCGA-DD  | 0.085278 | 0        | 0        | 0.11218  | 0 | 0.084492 | 0.001831 | 0        |
| TCGA-2Y- | 0.043622 | 0        | 0        | 0.075817 | 0 | 0.347896 | 0        | 0        |
| TCGA-2Y- | 0.026405 | 0        | 0.005338 | 0.015845 | 0 | 0.179247 | 0.003481 | 0        |
| TCGA-DD  | 0.078916 | 0        | 0.00957  | 0.054152 | 0 | 0.086608 | 0        | 0        |
| TCGA-DD  | 0.026458 | 0        | 0.00201  | 0.087408 | 0 | 0.213311 | 0        | 0.030168 |
| TCGA-XR- | 0.064775 | 0        | 0.007947 | 0.275875 | 0 | 0.073481 | 0.050836 | 0.087272 |
| TCGA-DD  | 0.008355 | 0        | 0.00346  | 0.019659 | 0 | 0.068229 | 0.052096 | 0.023478 |
| TCGA-DD  | 0.093568 | 0        | 0.009206 | 0.11778  | 0 | 0.264623 | 0        | 0        |
| TCGA-2Y- | 0.03818  | 0        | 0.004724 | 0.324915 | 0 | 0.106022 | 0.014204 | 0.032249 |
| TCGA-BD- | 0.030099 | 0        | 0.003481 | 0.223752 | 0 | 0.253809 | 0.00815  | 0        |
| TCGA-DD  | 0.029919 | 0        | 0.00244  | 0.127371 | 0 | 0.316692 | 0        | 0.012645 |
| TCGA-KR- | 0.029484 | 0        | 0.015672 | 0.024525 | 0 | 0.518299 | 0        | 0        |
| TCGA-ED- | 0.054137 | 0        | 0        | 0.034268 | 0 | 0.174685 | 0        | 0.063095 |
| TCGA-DD  | 0.021142 | 0        | 0.000192 | 0.080558 | 0 | 0.055242 | 0.004203 | 0.004103 |
| TCGA-G3- | 0.024732 | 0        | 0.003933 | 0.120516 | 0 | 0.195448 | 0        | 0.016409 |
| TCGA-ED- | 0.060299 | 0        | 0.033227 | 0.06318  | 0 | 0.150844 | 0        | 0.004028 |
| TCGA-DD  | 0.037954 | 0        | 0.001446 | 0.047686 | 0 | 0.429694 | 0        | 0        |
| TCGA-ZS- | 0.027572 | 0        | 0        | 0.079924 | 0 | 0.299257 | 0        | 0        |
| TCGA-EP- | 0.017204 | 0        | 0.04932  | 0.17262  | 0 | 0.096202 | 0.009907 | 0.042001 |

Supplementary table 3

|          |          |          |          |          |   |          |          |          |
|----------|----------|----------|----------|----------|---|----------|----------|----------|
| TCGA-FV- | 0        | 0.018206 | 0.049222 | 0.121864 | 0 | 0.290415 | 0        | 0.00056  |
| TCGA-CC- | 0.067645 | 0        | 0.001205 | 0.024357 | 0 | 0.295604 | 0        | 0        |
| TCGA-CC- | 0.015484 | 0        | 0.009232 | 0.026017 | 0 | 0.259246 | 0        | 0        |
| TCGA-ZS- | 0.033777 | 0        | 0.000548 | 0.062028 | 0 | 0.297876 | 0.009307 | 0        |
| TCGA-G3- | 0.049765 | 0.017969 | 0        | 0.093898 | 0 | 0.366653 | 0        | 0.019348 |
| TCGA-DD  | 0.048892 | 0        | 0        | 0.128339 | 0 | 0.250703 | 0        | 0.007055 |
| TCGA-EP- | 0.053419 | 0        | 0.002078 | 0.117634 | 0 | 0.140214 | 0        | 0        |
| TCGA-DD  | 0        | 0.00867  | 0.004673 | 0.082973 | 0 | 0.195409 | 0.007147 | 0.011454 |
| TCGA-G3- | 0.052592 | 0        | 0        | 0.074235 | 0 | 0.038741 | 0        | 0        |
| TCGA-DD  | 0.051839 | 0        | 0        | 0.100391 | 0 | 0.32167  | 0        | 0        |
| TCGA-CC- | 0.032549 | 0        | 0        | 0.043372 | 0 | 0.085586 | 0        | 0.059728 |
| TCGA-DD  | 0.145806 | 0        | 0.031128 | 0.092729 | 0 | 0.217721 | 0.050498 | 0        |
| TCGA-BC- | 0.028189 | 0        | 0.002631 | 0.179393 | 0 | 0.099104 | 0        | 0        |
| TCGA-5C- | 0.100404 | 0        | 0.008331 | 0.03324  | 0 | 0.247836 | 0.003095 | 0        |
| TCGA-DD  | 0.006689 | 0        | 0        | 0        | 0 | 0.208237 | 0        | 0.018302 |
| TCGA-BC- | 0.045972 | 0        | 0.005254 | 0.080411 | 0 | 0.234543 | 0.013773 | 0.001466 |
| TCGA-GJ- | 0.0698   | 0        | 0.009657 | 0.019093 | 0 | 0.13619  | 0.005934 | 0.009135 |
| TCGA-G3- | 0.043536 | 0        | 0        | 0.007159 | 0 | 0.17519  | 0.001243 | 0        |
| TCGA-DD  | 0.034413 | 0        | 0        | 0.11566  | 0 | 0.301008 | 0.002489 | 0        |
| TCGA-BC- | 0.038898 | 0        | 0        | 0.10501  | 0 | 0.16609  | 0        | 0.009917 |
| TCGA-2Y- | 0.065825 | 0        | 0.019052 | 0.171401 | 0 | 0.065198 | 0        | 0.058099 |
| TCGA-ZP- | 0.055083 | 0        | 0.008311 | 0.137468 | 0 | 0.348766 | 0        | 0        |
| TCGA-DD  | 0.018028 | 0        | 0        | 0.190747 | 0 | 0.151674 | 0        | 0.004967 |
| TCGA-2Y- | 0.08684  | 0        | 0.004309 | 0.350053 | 0 | 0.169945 | 0        | 0.017552 |
| TCGA-CC- | 0.055937 | 0.006259 | 0        | 0.012999 | 0 | 0.244561 | 0        | 0.00536  |
| TCGA-DD  | 0.00766  | 0        | 0        | 0.194299 | 0 | 0.345077 | 0        | 0        |
| TCGA-DD  | 0.103733 | 0        | 0.019182 | 0.270211 | 0 | 0.070401 | 0        | 0.017712 |
| TCGA-FV- | 0.049111 | 0        | 0.023474 | 0.125978 | 0 | 0.074941 | 0.012569 | 0.019609 |
| TCGA-G3- | 0        | 0.032666 | 0        | 0.018757 | 0 | 0.13576  | 0        | 0.022492 |
| TCGA-2Y- | 0.017373 | 0.01099  | 0        | 0.125931 | 0 | 0.197858 | 0        | 0        |
| TCGA-3K- | 0.069428 | 0        | 0.003846 | 0.170875 | 0 | 0.313366 | 0        | 0        |
| TCGA-CC- | 0.179758 | 0        | 0.022929 | 0.075835 | 0 | 0.217553 | 0        | 0.033173 |
| TCGA-ZP- | 0.154765 | 0        | 0.065981 | 0.060993 | 0 | 0.187081 | 0.004032 | 0.005557 |
| TCGA-2Y- | 0.026357 | 0.007715 | 0.014436 | 0.102662 | 0 | 0.262268 | 0        | 0.083433 |
| TCGA-G3- | 0.030977 | 0        | 0.0027   | 0.038261 | 0 | 0.215184 | 0        | 0.005873 |
| TCGA-DD  | 0.030723 | 0        | 0.000182 | 0.237235 | 0 | 0.141767 | 0.022238 | 0.016022 |
| TCGA-RG- | 0.068939 | 0        | 0.062086 | 0.266996 | 0 | 0.041268 | 0.026088 | 0.082584 |
| TCGA-DD  | 0.015784 | 0.009639 | 0        | 0.081248 | 0 | 0.177254 | 0        | 0        |
| TCGA-DD  | 0.010728 | 0        | 0        | 0.095622 | 0 | 0.256609 | 0        | 0        |
| TCGA-5R- | 0.119902 | 0        | 0.019851 | 0.10268  | 0 | 0.246879 | 0.004629 | 0        |
| TCGA-EP- | 0.033114 | 0        | 0.003151 | 0.183784 | 0 | 0.135844 | 0.019882 | 0.028479 |
| TCGA-DD  | 0.018627 | 0        | 0        | 0.131432 | 0 | 0.124291 | 0        | 0        |
| TCGA-G3- | 0.00702  | 0        | 0.0002   | 0        | 0 | 0.360094 | 0        | 0.025052 |
| TCGA-ED- | 0        | 0.013852 | 0        | 0.007802 | 0 | 0.118313 | 0        | 0.019316 |
| TCGA-DD  | 0.048368 | 0        | 0        | 0.258631 | 0 | 0        | 0        | 0.024774 |
| TCGA-MR  | 0.038714 | 0        | 0.005862 | 0.12056  | 0 | 0.205411 | 0.011748 | 0        |
| TCGA-RC- | 0.159739 | 0        | 0.074683 | 0.126429 | 0 | 0.143397 | 0.073905 | 0.051182 |
| TCGA-DD  | 0.00262  | 0.006165 | 0.011993 | 0.121586 | 0 | 0.285827 | 0        | 0        |
| TCGA-WX  | 0.141265 | 0        | 0.008278 | 0        | 0 | 0.181459 | 0        | 0.02541  |
| TCGA-DD  | 0.143777 | 0        | 0.007301 | 0.003855 | 0 | 0.081536 | 0        | 0        |
| TCGA-DD  | 0.05078  | 0        | 0.004595 | 0.262512 | 0 | 0.012476 | 0.027827 | 0.038739 |
| TCGA-CC- | 0.089756 | 0        | 0.005051 | 0.090807 | 0 | 0.214361 | 0        | 0.057786 |
| TCGA-DD  | 0.001505 | 0        | 0.000858 | 0        | 0 | 0.075847 | 0.003779 | 0.012474 |
| TCGA-WC  | 0        | 0.017358 | 0.003567 | 0.051008 | 0 | 0.216015 | 0        | 0        |
| TCGA-DD  | 0.033653 | 0        | 0        | 0        | 0 | 0.27118  | 0        | 0.062755 |
| TCGA-DD  | 0.02147  | 0        | 0        | 0        | 0 | 0.148005 | 0        | 0.010714 |
| TCGA-DD  | 0.127061 | 0        | 0.058072 | 0.155182 | 0 | 0.285291 | 0        | 0.001578 |
| TCGA-DD  | 0.081741 | 0        | 0.007438 | 0.162658 | 0 | 0.174309 | 0.019137 | 0.050496 |

Supplementary table 3

|          |          |          |          |          |   |          |          |          |
|----------|----------|----------|----------|----------|---|----------|----------|----------|
| TCGA-5C- | 0.001582 | 0.007161 | 0.062835 | 0.237208 | 0 | 0.075666 | 0.014606 | 0.059737 |
| TCGA-HP- | 0.076017 | 0        | 0.005765 | 0.026419 | 0 | 0.211567 | 0        | 0        |
| TCGA-T1- | 0        | 0.001492 | 0.031486 | 0.10866  | 0 | 0.162812 | 0        | 0        |
| TCGA-XR- | 0.000324 | 0.015056 | 0        | 0.015426 | 0 | 0.488517 | 0        | 0        |
| TCGA-DD  | 0.01086  | 0        | 0.003048 | 0.0772   | 0 | 0.297971 | 0        | 0.021883 |
| TCGA-MI- | 0.025978 | 0        | 0.004705 | 0.181232 | 0 | 0.245309 | 0.000889 | 0.001286 |
| TCGA-DD  | 0.084592 | 0        | 0.00118  | 0.104773 | 0 | 0.22768  | 0        | 0.053292 |
| TCGA-DD  | 0.088682 | 0        | 0.005895 | 0.31504  | 0 | 0.069386 | 0.001614 | 0.013679 |
| TCGA-DD  | 0.09947  | 0        | 0.003796 | 0.095644 | 0 | 0.012706 | 0        | 0.005781 |
| TCGA-BC- | 0.012862 | 0        | 0.0013   | 0.224739 | 0 | 0.150733 | 0.05778  | 0.038698 |
| TCGA-BC- | 0.044041 | 0        | 0.005326 | 0.155464 | 0 | 0.078575 | 0.081362 | 0.039367 |
| TCGA-XR- | 0.081841 | 0        | 0.008261 | 0.020814 | 0 | 0.213617 | 0        | 0.002127 |
| TCGA-RC- | 0.059141 | 0        | 0.007566 | 0.055316 | 0 | 0.169934 | 0.000584 | 0.054802 |
| TCGA-BC- | 0.041647 | 0        | 0.001764 | 0.064881 | 0 | 0.164138 | 0        | 0        |
| TCGA-DD  | 0.009642 | 0        | 0.009425 | 0.018151 | 0 | 0.183553 | 0        | 0.003638 |
| TCGA-DD  | 0.074473 | 0        | 0        | 0.197043 | 0 | 0.226761 | 0.064266 | 0        |
| TCGA-2Y- | 0.019564 | 0        | 0.009583 | 0.14423  | 0 | 0.153934 | 0        | 0.004191 |
| TCGA-ED- | 0.208531 | 0        | 0.035817 | 0.21986  | 0 | 0.189642 | 0.01833  | 0.034893 |
| TCGA-DD  | 0.012969 | 0.012057 | 3.08E-06 | 0.093037 | 0 | 0.191809 | 0        | 0.003088 |
| TCGA-G3- | 0        | 0        | 0        | 0.067217 | 0 | 0.247729 | 0        | 0        |
| TCGA-DD  | 0.01388  | 0        | 0        | 0.094123 | 0 | 0.252057 | 0        | 0.001063 |
| TCGA-DD  | 0.041359 | 0        | 0        | 0.061406 | 0 | 0.231405 | 0        | 0        |
| TCGA-EP- | 0.020702 | 0        | 0.019713 | 0.256189 | 0 | 0.145064 | 0.000375 | 0.014561 |
| TCGA-DD  | 0.017108 | 0        | 0.009686 | 0.209986 | 0 | 0.027331 | 0.054759 | 0.066768 |
| TCGA-DD  | 0.020954 | 0        | 0.00846  | 0.097644 | 0 | 0.321717 | 0.002355 | 0.004282 |
| TCGA-DD  | 0.039295 | 0        | 0        | 0.101505 | 0 | 0.067475 | 0        | 0.086115 |
| TCGA-BD- | 0.043999 | 0        | 0.004861 | 0.03684  | 0 | 0.19797  | 0.006556 | 0        |
| TCGA-GJ- | 0.006817 | 0        | 0        | 0.026895 | 0 | 0.042532 | 0.013872 | 0.036484 |
| TCGA-2Y- | 0.046477 | 0        | 0.00278  | 0.029341 | 0 | 0.108131 | 0        | 0        |
| TCGA-BC- | 0.008226 | 0        | 0.002022 | 0.244432 | 0 | 0.139537 | 0.019971 | 0.073043 |
| TCGA-CC- | 0.051881 | 0        | 0.00915  | 0.135875 | 0 | 0.13615  | 0        | 0.045979 |
| TCGA-CC- | 0        | 0.036852 | 0        | 0.241241 | 0 | 0.06415  | 0        | 0.060634 |
| TCGA-DD  | 0.041911 | 0        | 0.004436 | 0.087572 | 0 | 0.262554 | 0        | 0        |
| TCGA-DD  | 0.002571 | 0        | 0.014972 | 0.415211 | 0 | 0        | 0.051691 | 0.05598  |
| TCGA-FV- | 0.047421 | 0        | 0        | 0.121724 | 0 | 0.206547 | 0        | 0.012301 |
| TCGA-DD  | 0.046539 | 0        | 0.001088 | 0.09104  | 0 | 0.303707 | 0        | 0        |
| TCGA-DD  | 0.037708 | 0        | 0.003697 | 0.527946 | 0 | 0        | 0.0041   | 0.032615 |
| TCGA-DD  | 0.042066 | 0        | 0.001314 | 0        | 0 | 0.179848 | 0        | 0.01751  |
| TCGA-DD  | 0.099954 | 0        | 0        | 0.109205 | 0 | 0.117575 | 0        | 0.019371 |
| TCGA-DD  | 0.017569 | 0        | 0        | 0.187868 | 0 | 0.086519 | 0        | 0        |
| TCGA-DD  | 0.02694  | 0        | 0.005049 | 0.090355 | 0 | 0.066367 | 0.021961 | 0.022806 |
| TCGA-DD  | 0.062946 | 0        | 0.030618 | 0.346717 | 0 | 0.075907 | 0.023145 | 0.045702 |
| TCGA-G3- | 0.054449 | 0        | 0.005358 | 0.114568 | 0 | 0.241774 | 0        | 0.014618 |
| TCGA-DD  | 0.009914 | 0        | 0.000632 | 0        | 0 | 0.335567 | 0        | 0        |
| TCGA-CC- | 0.095754 | 0        | 0.010346 | 0.160314 | 0 | 0.226369 | 0.059682 | 0.053917 |
| TCGA-G3- | 0.105624 | 0        | 0.019935 | 0.088658 | 0 | 0.166855 | 0        | 0        |
| TCGA-G3- | 0.026205 | 0.028122 | 0        | 0.184048 | 0 | 0.19723  | 0        | 0.087872 |
| TCGA-RC- | 0.027489 | 0        | 0.00501  | 0.102569 | 0 | 0.052096 | 0        | 0        |
| TCGA-DD  | 0.029666 | 0        | 0.0306   | 0.307084 | 0 | 0.004163 | 0.070567 | 0.091129 |
| TCGA-2V- | 0.029294 | 0        | 0.005273 | 0.296878 | 0 | 0.102177 | 0.019291 | 0.048447 |
| TCGA-DD  | 0        | 0.001385 | 0.00206  | 0.0278   | 0 | 0.13635  | 0        | 0.010607 |
| TCGA-WX  | 0.059814 | 0        | 0.006609 | 0.052355 | 0 | 0.140925 | 0        | 0.017443 |
| TCGA-2Y- | 0.018434 | 0.004022 | 0.006522 | 0.101117 | 0 | 0.177281 | 0        | 0.008802 |
| TCGA-DD  | 0.019347 | 0        | 0.002331 | 0.129831 | 0 | 0.218925 | 0.020022 | 0        |
| TCGA-ED- | 0.158096 | 0        | 0.017897 | 0.056823 | 0 | 0.323066 | 0        | 0        |
| TCGA-DD  | 0.106315 | 0        | 0.002654 | 0.127673 | 0 | 0.090683 | 0        | 0        |
| TCGA-G3- | 0.034703 | 0        | 0        | 0.011102 | 0 | 0.146891 | 0        | 0        |
| TCGA-FV- | 0.073716 | 0        | 0.005703 | 0.176027 | 0 | 0.15796  | 0.004587 | 0.023488 |

Supplementary table 3

|          |          |          |          |          |          |          |          |          |
|----------|----------|----------|----------|----------|----------|----------|----------|----------|
| TCGA-ZP- | 0.068444 | 0        | 0        | 0.011033 | 0        | 0.163137 | 0.002799 | 0        |
| TCGA-DD  | 0.124023 | 0        | 0        | 0.102872 | 0        | 0.260032 | 0.004539 | 0.020548 |
| TCGA-DD  | 0.024962 | 0        | 0.006094 | 0.087572 | 0        | 0.188783 | 0.003551 | 0        |
| TCGA-G3- | 0.002734 | 0.00304  | 0        | 0.02205  | 0        | 0.145142 | 0        | 0        |
| TCGA-ED- | 0.057734 | 0        | 0.030589 | 0.153222 | 0        | 0.190646 | 0        | 0.027963 |
| TCGA-EP- | 0.063815 | 0        | 0.007018 | 0        | 0        | 0.194145 | 0        | 0.000203 |
| TCGA-BC- | 0.109907 | 0        | 0.002743 | 0.10133  | 0        | 0.168198 | 0        | 0        |
| TCGA-CC- | 0.059922 | 0        | 0.002065 | 0.124287 | 0        | 0.102262 | 0        | 0.028397 |
| TCGA-DD  | 0.017254 | 0        | 0        | 0.054826 | 0        | 0.13732  | 0        | 0        |
| TCGA-DD  | 0        | 0.006994 | 0.046745 | 0.129109 | 0        | 0.048337 | 0.03703  | 0.041415 |
| TCGA-DD  | 0.06533  | 0        | 0.007942 | 0.059295 | 0        | 0.04312  | 0.030462 | 0        |
| TCGA-CC- | 0        | 0.027837 | 0.016225 | 0.06927  | 0        | 0.140794 | 0        | 0.038759 |
| TCGA-DD  | 0.010269 | 0        | 0.002242 | 0.177409 | 0        | 0.074868 | 0        | 0.009564 |
| TCGA-DD  | 0.131777 | 0        | 0.016713 | 0.165671 | 0        | 0.034851 | 0.00338  | 0.031482 |
| TCGA-G3- | 0.087697 | 0        | 0.006213 | 0.172218 | 0        | 0.082749 | 0        | 0.025231 |
| TCGA-G3- | 0.08674  | 0        | 0.001088 | 0.116244 | 0        | 0.20339  | 0        | 0        |
| TCGA-CC- | 0.026439 | 0        | 0.006371 | 0.148527 | 0        | 0.192976 | 0        | 0        |
| TCGA-CC- | 0        | 0.038362 | 0.000568 | 0.197977 | 0        | 0.113142 | 0.026357 | 0.049695 |
| TCGA-DD  | 0.039416 | 0        | 0        | 0.173571 | 0        | 0.070492 | 0        | 0.006301 |
| TCGA-DD  | 0.030387 | 0        | 0        | 0.395199 | 0        | 0.056838 | 0        | 0.030342 |
| TCGA-NI- | 0.049401 | 0        | 0        | 0        | 0        | 0.160138 | 0        | 0.024245 |
| TCGA-DD  | 0.064539 | 0        | 0.004851 | 0.134161 | 0.013864 | 0        | 0        | 0        |
| TCGA-DD  | 0.035052 | 0        | 0        | 0.145237 | 0        | 0.28635  | 0        | 0.013892 |
| TCGA-DD  | 0.033688 | 0        | 0.001199 | 0.021899 | 0        | 0.17921  | 0.005756 | 0        |
| TCGA-BC- | 0.051102 | 0        | 0.006607 | 0.103869 | 0        | 0.219667 | 0        | 0        |
| TCGA-RC- | 0        | 0.013739 | 0.04716  | 0.162875 | 0        | 0.193385 | 0        | 0.081184 |
| TCGA-WJ- | 0.085216 | 0        | 0        | 0.011828 | 0        | 0.332716 | 0        | 0        |
| TCGA-DD  | 0.00332  | 0.001741 | 0.015771 | 0.052098 | 0        | 0.093562 | 0        | 0.017844 |
| TCGA-CC- | 0.074245 | 0        | 0.014739 | 0.17582  | 0        | 0.109857 | 0.088152 | 0.100798 |
| TCGA-DD  | 0.039306 | 0        | 0.012776 | 0.14174  | 0        | 0.32254  | 0.004012 | 0        |
| TCGA-DD  | 0.046508 | 0        | 0        | 0.260108 | 0        | 0.222757 | 0        | 0.003731 |
| TCGA-BC- | 0.010316 | 0        | 0.012885 | 0.117908 | 0        | 0.301715 | 0        | 0.031608 |
| TCGA-DD  | 0.060363 | 0        | 0.004614 | 0.056124 | 0        | 0.110462 | 0        | 0.006676 |
| TCGA-DD  | 0.064307 | 0        | 0.003474 | 0.077214 | 0        | 0.414934 | 0.044459 | 0        |
| TCGA-CC- | 0.091298 | 0        | 0.011239 | 0.072877 | 0        | 0.030698 | 0        | 0.020093 |
| TCGA-DD  | 0.098026 | 0        | 0.007796 | 0.088785 | 0        | 0.276165 | 0        | 0        |
| TCGA-2Y- | 0.056331 | 0        | 0.007621 | 0.103103 | 0        | 0.340292 | 0.001198 | 0        |
| TCGA-CC- | 0.028981 | 0        | 0.005819 | 0.087365 | 0        | 0.077904 | 0        | 0.001062 |
| TCGA-DD  | 0.039543 | 0        | 0        | 0.031367 | 0        | 0.162518 | 0        | 0        |
| TCGA-RC- | 0.022371 | 0        | 0.002514 | 0.13615  | 0        | 0.214397 | 0        | 0.049484 |
| TCGA-DD  | 0.066643 | 0        | 0.005019 | 0.076132 | 0        | 0.27474  | 0        | 0.032801 |
| TCGA-G3- | 0.12766  | 0        | 0.007619 | 0.114013 | 0        | 0.276241 | 0        | 0        |
| TCGA-DD  | 0.042629 | 0        | 0.000292 | 0.049146 | 0        | 0.25172  | 0        | 0.005242 |
| TCGA-ZP- | 0.058936 | 0        | 0.004149 | 0.117255 | 0        | 0.227898 | 0.012645 | 0        |
| TCGA-KR- | 0.07077  | 0        | 0.010168 | 0.072028 | 0        | 0.123845 | 0        | 0.002864 |
| TCGA-BC- | 0.001227 | 0        | 0.005732 | 0.149898 | 0        | 0.221362 | 0        | 0.027705 |
| TCGA-ED- | 0.049061 | 0        | 0        | 0.171366 | 0        | 0.268658 | 0        | 0.00374  |
| TCGA-CC- | 0.032548 | 0        | 0        | 0.106405 | 0        | 0.22386  | 0        | 0.062566 |
| TCGA-UB- | 0.023541 | 0        | 0        | 0.042114 | 0        | 0.23621  | 0        | 0.07213  |
| TCGA-ED- | 0.050909 | 0        | 0.008109 | 0.281033 | 0        | 0.301068 | 0        | 0        |
| TCGA-XR- | 0.056449 | 0        | 0.002909 | 0.003291 | 0        | 0.406617 | 0        | 0        |
| TCGA-DD  | 0.049251 | 0        | 0        | 0.119406 | 0        | 0.113415 | 0        | 0.061183 |
| TCGA-K7- | 0.054324 | 0        | 0        | 0.150436 | 0        | 0.22587  | 0        | 0        |
| TCGA-ZP- | 0.022536 | 0        | 0        | 0.080024 | 0        | 0.450817 | 0        | 0        |
| TCGA-DD  | 0.046287 | 0        | 0        | 0.285728 | 0        | 0.16811  | 0        | 0.021185 |
| TCGA-DD  | 0.080089 | 0        | 0        | 0.108839 | 0        | 0.088721 | 0        | 0        |
| TCGA-2Y- | 0.022377 | 0        | 0.029133 | 0.221685 | 0        | 0.150476 | 0        | 0.030686 |
| TCGA-DD  | 0.028685 | 0        | 0.008129 | 0.167319 | 0        | 0.385697 | 0        | 0        |

Supplementary table 3

|          |          |          |          |          |   |          |          |          |
|----------|----------|----------|----------|----------|---|----------|----------|----------|
| TCGA-EP- | 0.054393 | 0        | 0.010404 | 0.093543 | 0 | 0.134015 | 0        | 0        |
| TCGA-DD  | 0.058109 | 0        | 0.006305 | 0.144091 | 0 | 0.303076 | 0        | 0        |
| TCGA-ED- | 0.005952 | 0.00247  | 0        | 0.084857 | 0 | 0.095412 | 0        | 0.009527 |
| TCGA-LG- | 0.010129 | 0        | 0        | 0.048942 | 0 | 0.267043 | 0        | 0.023075 |
| TCGA-UB- | 0.058805 | 0        | 0.010021 | 0.166221 | 0 | 0.129975 | 0.004662 | 0.093172 |
| TCGA-G3- | 0.119502 | 0        | 0.009309 | 0.142307 | 0 | 0.022689 | 0        | 0.01359  |
| TCGA-DD  | 0.001326 | 0        | 0.00865  | 0.075056 | 0 | 0.062052 | 0        | 0.000594 |
| TCGA-LG- | 0.143197 | 0        | 0        | 0.089678 | 0 | 0.211912 | 0        | 0        |
| TCGA-ZS- | 0.07611  | 0        | 0.009322 | 0.088294 | 0 | 0.132252 | 0        | 0.001646 |
| TCGA-K7- | 0.038867 | 0        | 0.001299 | 0.17739  | 0 | 0.157911 | 0        | 0.032122 |
| TCGA-DD  | 0.053381 | 0        | 0.018352 | 0.407972 | 0 | 0        | 0.012274 | 0.018881 |
| TCGA-DD  | 0.009357 | 0        | 0        | 0.077766 | 0 | 0.089961 | 0        | 0.030187 |
| TCGA-DD  | 0.002978 | 0.002228 | 0.008348 | 0.056633 | 0 | 0.222827 | 0        | 0.031955 |
| TCGA-DD  | 0.136664 | 0        | 0.003663 | 0.193597 | 0 | 0.311822 | 0.017839 | 0.011679 |
| TCGA-G3- | 0.029127 | 0        | 0        | 0        | 0 | 0.15132  | 0        | 0        |
| TCGA-O8- | 0.041575 | 0        | 0.00685  | 0.217662 | 0 | 0.105949 | 0.00548  | 0        |
| TCGA-ZP- | 0.10026  | 0        | 0.006488 | 0.061479 | 0 | 0.117214 | 0        | 0        |
| TCGA-G3- | 0.040957 | 0        | 0.005115 | 0.046464 | 0 | 0.071388 | 0        | 0.022911 |
| TCGA-DD  | 0.016646 | 0.011877 | 0        | 0.073607 | 0 | 0.139066 | 0        | 0        |

Supplementary table 3



| T cells reg | T cells gan | NK cells re | NK cells ac | Monocyte | Macroph  | Macroph  | Macroph  | Dendritic c |
|-------------|-------------|-------------|-------------|----------|----------|----------|----------|-------------|
| 0           | 0.037974    | 0.017675    | 0.02393     | 0.158097 | 0        | 0.049659 | 0.351158 | 0.011901    |
| 0           | 0.022976    | 0           | 0.030992    | 0.112064 | 0.06664  | 0.050159 | 0.381044 | 0           |
| 0           | 0.000102    | 0           | 0.062259    | 0.081174 | 0.121904 | 0.108944 | 0.330358 | 0.013381    |
| 0.006104    | 0.048486    | 0.003015    | 0.049456    | 0.037835 | 0        | 0.058428 | 0.298769 | 0.004402    |
| 0           | 0.022759    | 0           | 0.046761    | 0.260065 | 0.102741 | 0.067865 | 0.189045 | 0           |
| 0           | 0.02619     | 0           | 0.032309    | 0.136074 | 0.032031 | 0.073886 | 0.434971 | 0           |
| 0.003404    | 0.047351    | 0           | 0.05654     | 0.00519  | 0.046486 | 0.043646 | 0.428407 | 0           |
| 0.002102    | 0.010091    | 0           | 0.095868    | 0.057922 | 0.032302 | 0.040614 | 0.294163 | 0           |
| 0           | 0.003098    | 0           | 0.065486    | 0.122858 | 0        | 0.039385 | 0.159438 | 0.028039    |
| 0.000769    | 0           | 0           | 0.051428    | 0.053874 | 0        | 0.054213 | 0.482599 | 0           |
| 0.012764    | 0.006893    | 0.003255    | 0.054482    | 0.080772 | 0.066267 | 0.122079 | 0.326559 | 0.038626    |
| 0           | 0           | 0           | 0.063358    | 0.157686 | 0        | 0.09782  | 0.375553 | 0           |
| 0           | 0           | 0.025593    | 0.005631    | 0.048693 | 0.005919 | 0.137419 | 0.254518 | 0.006074    |
| 0.031752    | 0.005131    | 0.023563    | 0           | 0.015169 | 0.004424 | 0.119835 | 0.212073 | 0.000646    |
| 0.033908    | 0           | 0           | 0.01059     | 0.016825 | 0        | 0.172254 | 0.170183 | 0.029202    |
| 0.012429    | 0           | 0.045425    | 0.022681    | 0.096622 | 0        | 0.059778 | 0.277196 | 0.009413    |
| 0           | 0.037049    | 0           | 0.074866    | 0.086771 | 0        | 0.036996 | 0.330941 | 0           |
| 0           | 0.014395    | 0           | 0.061743    | 0.138341 | 0.095399 | 0.027447 | 0.284206 | 0           |
| 0.006418    | 0           | 0           | 0.011319    | 0.022082 | 0        | 0.132393 | 0.24591  | 0           |
| 0           | 0.024699    | 0           | 0.026514    | 0.013529 | 0.025302 | 0.113353 | 0.275927 | 2.67E-05    |
| 0           | 0.049429    | 0           | 0.004721    | 0.058821 | 0        | 0.04157  | 0.367772 | 0           |
| 0.028414    | 0.005744    | 0           | 0.090162    | 0.048651 | 0.094702 | 0.074987 | 0.177656 | 0.009718    |
| 0           | 0           | 0.052433    | 0.013664    | 0.06226  | 0.00193  | 0.024656 | 0.389478 | 0           |
| 0.024032    | 0.016933    | 0           | 0.030586    | 0.080215 | 0.043242 | 0.203124 | 0.229471 | 0.019846    |
| 0           | 0.022235    | 0.030469    | 0.019719    | 0.174942 | 0.026251 | 0.050211 | 0.363344 | 0           |
| 0.026338    | 0.004437    | 0.020887    | 0.078537    | 0.132692 | 0.112131 | 0.070587 | 0.252361 | 0           |
| 0.001838    | 0           | 0           | 0.058176    | 0.079688 | 0.074458 | 0.071791 | 0.143925 | 0           |
| 0.071203    | 0.000311    | 0           | 0.056149    | 0.074823 | 0.027303 | 0.131287 | 0.218822 | 0           |
| 0.0239      | 0.045986    | 0.009187    | 0.003689    | 0.00094  | 0.017694 | 0.144867 | 0.354785 | 0.003648    |
| 0           | 0.036778    | 0           | 0.077086    | 0.021261 | 0.141858 | 0.087122 | 0.202151 | 0.023827    |
| 0.00629     | 0.009158    | 0.004096    | 0.031199    | 0.052046 | 0.045025 | 0.075246 | 0.270199 | 0.002157    |
| 0           | 0.001892    | 0           | 0.062844    | 0.064673 | 0.245365 | 0.04719  | 0.178009 | 0           |
| 0.002777    | 0.054014    | 0           | 0.071828    | 0.036975 | 0        | 0.115169 | 0.251119 | 0.017082    |
| 0.000362    | 0           | 0           | 0.038033    | 0.035313 | 0.020562 | 0.077531 | 0.184453 | 0.063788    |
| 0           | 0.024598    | 0.006151    | 0.02778     | 0.009973 | 0.061791 | 0.117902 | 0.096449 | 0.002835    |
| 0           | 0.07546     | 0           | 0.044729    | 0.069226 | 0.064402 | 0.053794 | 0.306872 | 0.002294    |
| 0           | 0.032463    | 0           | 0.056699    | 0.038106 | 0.031528 | 0.088881 | 0.346256 | 0.020022    |
| 0.006131    | 0.034717    | 0.045696    | 0           | 0.10971  | 0        | 0.12734  | 0.19909  | 0.001066    |
| 0.002277    | 0.068226    | 0.010981    | 0.005941    | 0.090885 | 0        | 0.025912 | 0.273734 | 0           |
| 0.028183    | 0           | 0.03296     | 0.033982    | 0.049165 | 0.004381 | 0.033374 | 0.428568 | 0           |
| 0           | 0.084137    | 0.003137    | 0.040997    | 0.085176 | 0.040388 | 0.076477 | 0.353627 | 0           |
| 0           | 0           | 0           | 0.02965     | 0.130029 | 0.098257 | 0.032363 | 0.225092 | 0           |
| 0.024657    | 0           | 0.00445     | 0.038552    | 0.014894 | 0.033529 | 0.086236 | 0.200361 | 0.028535    |
| 0.00526     | 0           | 0           | 0.018996    | 0.037269 | 0        | 0.135452 | 0.219768 | 0.004448    |
| 0           | 0           | 0.045443    | 0.019285    | 0.205992 | 0.026337 | 0.079308 | 0.298101 | 0           |
| 0.021704    | 0.062735    | 0.014819    | 0           | 0.003257 | 0.001808 | 0.14218  | 0.22589  | 0.017325    |
| 0.011486    | 0           | 0           | 0.045998    | 0.038525 | 0.031387 | 0.103411 | 0.125357 | 0.026839    |
| 0.044626    | 0.013682    | 0.025409    | 0.062504    | 0.024777 | 0.024764 | 0.058679 | 0.30509  | 0.002831    |
| 0.010758    | 0           | 0           | 0.050388    | 0.025393 | 0.042517 | 0.303182 | 0.042438 | 0.00731     |
| 0.009059    | 0           | 0.06518     | 0.041214    | 0.122728 | 0.027764 | 0.049973 | 0.201587 | 0           |
| 0.02791     | 0.041073    | 0           | 0.058313    | 0        | 0.03516  | 0.13347  | 0.130337 | 0.020728    |
| 0.01266     | 0.018944    | 0           | 0.027244    | 0.033989 | 0.011141 | 0.106845 | 0.235032 | 0.01911     |
| 0.01555     | 0           | 0           | 0.071736    | 0.040743 | 0.0293   | 0.134835 | 0.080391 | 0.017165    |
| 0.041219    | 0           | 0           | 0.028485    | 0        | 0.158863 | 0.063745 | 0.105006 | 0.016287    |
| 0.026663    | 0           | 0           | 0.09523     | 0.013494 | 0.030651 | 0.069729 | 0.125891 | 0.123497    |
| 0.015194    | 0.006529    | 0           | 0.053484    | 0.026856 | 0.029864 | 0.160834 | 0.059045 | 0.008317    |
| 0.030547    | 0           | 0           | 0.093272    | 0.084702 | 0.173626 | 0.024249 | 0.169823 | 0.003865    |

Supplementary table 3

|          |          |          |          |          |          |          |          |          |
|----------|----------|----------|----------|----------|----------|----------|----------|----------|
| 0        | 0.075427 | 0        | 0        | 0.002284 | 0.158099 | 0.01297  | 0.240622 | 0.003514 |
| 0.014098 | 0.010675 | 0        | 0.10793  | 0.043542 | 0.074564 | 0.093065 | 0.194017 | 0.011212 |
| 0.099    | 0        | 0.000156 | 0.03766  | 0.019499 | 0.304178 | 0.125013 | 0.10713  | 0.037474 |
| 0.045832 | 0        | 0        | 0.0979   | 0.031664 | 0.126618 | 0.019395 | 0.262054 | 0.028708 |
| 0.02108  | 0        | 0        | 0.071294 | 0.021304 | 0.24534  | 0.058585 | 0.191529 | 0.008343 |
| 0.023446 | 0        | 0        | 0.009167 | 0        | 0.239644 | 0.02807  | 0.320206 | 0.042626 |
| 0.034352 | 0.011314 | 0        | 0.052618 | 0.009213 | 0.165209 | 0.029258 | 0.297905 | 0        |
| 0.082679 | 0        | 0        | 0.075274 | 0.009257 | 0.106459 | 0.077151 | 0.20707  | 0.01731  |
| 0.084446 | 0        | 0.008922 | 0.024209 | 0        | 0.150074 | 0.084246 | 0.131809 | 0.006637 |
| 0.132838 | 0.00647  | 0        | 0.073399 | 0        | 0        | 0.026681 | 0.184922 | 0.019199 |
| 0.020185 | 0.01668  | 0        | 0.065237 | 0.010353 | 0.188441 | 0.10398  | 0.117334 | 0.060293 |
| 0.060448 | 0        | 0        | 0.060916 | 0.024921 | 0.334915 | 0.033477 | 0.176557 | 0.001685 |
| 0.009407 | 0        | 0        | 0.008079 | 0.009038 | 0.075983 | 0.104624 | 0.197631 | 0.180759 |
| 0.034085 | 0        | 0        | 0.010623 | 0.010227 | 0.424197 | 0.089799 | 0.103639 | 0.019519 |
| 0        | 0        | 0        | 0.071998 | 0.05472  | 0.137691 | 0.047928 | 0.173163 | 0.005907 |
| 0.040308 | 0        | 0.001689 | 0.025761 | 0        | 0.099605 | 0.056132 | 0.197004 | 0.077441 |
| 0.054989 | 0        | 0        | 0.052688 | 0.005499 | 0.046804 | 0.041371 | 0.088084 | 0.033311 |
| 0.014234 | 0        | 0        | 0.057434 | 0.026987 | 0.078996 | 0.133836 | 0.102537 | 0.002003 |
| 0.050109 | 0        | 0.003166 | 0.127095 | 0.02491  | 0.248344 | 0.03868  | 0.117105 | 0        |
| 0.049275 | 0        | 0        | 0.086196 | 0.007437 | 0.083224 | 0.106507 | 0.083256 | 0.01323  |
| 0.034916 | 0        | 0.011187 | 0.016897 | 0.025437 | 0.028925 | 0.087952 | 0.138721 | 0.141322 |
| 0        | 0.097883 | 0        | 0.041548 | 0        | 0.110404 | 0.047922 | 0.14293  | 0.031913 |
| 0.063219 | 0        | 0        | 0.052695 | 0.028188 | 0.254771 | 0.076929 | 0.184996 | 0        |
| 0.057589 | 0.005686 | 0        | 0.038694 | 0.011181 | 0.328929 | 0.091916 | 0.09466  | 0.049129 |
| 0.024424 | 0        | 0        | 0.05225  | 0.021376 | 0.061047 | 0.061782 | 0.116162 | 0.055181 |
| 0.03295  | 0        | 0        | 0.125779 | 0.01913  | 0.036362 | 0.091828 | 0.183134 | 0.040973 |
| 0.029121 | 0        | 0        | 0.040004 | 0.000963 | 0.098254 | 0.093832 | 0.201395 | 0.008388 |
| 0.077587 | 0        | 0        | 0.032805 | 0.012047 | 0.219542 | 0.059545 | 0.119751 | 0.017202 |
| 0.064844 | 0        | 0.000373 | 0.037858 | 0.014053 | 0.097483 | 0.100607 | 0.307423 | 0.011012 |
| 0.030892 | 0        | 0        | 0.021742 | 0.025393 | 0.315544 | 0.089172 | 0.089704 | 0.004927 |
| 0.05574  | 0        | 0.01221  | 0.051444 | 0.139938 | 0.013523 | 0.07691  | 0.18395  | 0        |
| 0.05584  | 0        | 0        | 0.040737 | 0.00936  | 0.142678 | 0.136474 | 0.125115 | 0.058318 |
| 0.091981 | 0        | 0        | 0.068431 | 0        | 0.099396 | 0.032517 | 0.280808 | 0.076611 |
| 0.002422 | 0        | 0        | 0.097391 | 0.060909 | 0.067445 | 0.138878 | 0.116103 | 0.011152 |
| 0.000676 | 0        | 0        | 0.042898 | 0.037177 | 0.168155 | 0.036471 | 0.239383 | 0.005764 |
| 0.045202 | 0.008043 | 0        | 0.033718 | 0.032695 | 0.082084 | 0.120809 | 0.20616  | 0.069911 |
| 0.053192 | 0        | 0        | 0.052707 | 0.001611 | 0.079077 | 0.080876 | 0.184361 | 0.069902 |
| 0.012769 | 0.003147 | 0        | 0.050447 | 0        | 0.530581 | 0.021869 | 0.224717 | 0.002779 |
| 0.010986 | 0        | 0        | 0.029346 | 0.027146 | 0.039908 | 0.164951 | 0.154153 | 0.052585 |
| 0        | 0        | 0        | 0.035945 | 0.026442 | 0.154017 | 0.117825 | 0.232222 | 0.1524   |
| 0        | 0        | 0.031794 | 0        | 0.032411 | 0.094086 | 0.004429 | 0.351132 | 0        |
| 0.004616 | 0.031535 | 0        | 0.052763 | 0.042191 | 0        | 0.048026 | 0.325841 | 0.004693 |
| 0.115745 | 0        | 0        | 0.037265 | 0.00305  | 0.190408 | 0.061297 | 0.071133 | 0.031576 |
| 0.042027 | 0        | 0        | 0.062815 | 0.015528 | 0.022594 | 0.065863 | 0.121128 | 0.121713 |
| 0        | 0        | 0        | 0.038509 | 0.010815 | 0.017667 | 0.043745 | 0.02061  | 0.00073  |
| 0.119159 | 0        | 0        | 0.0334   | 0        | 0.167795 | 0.051016 | 0.085956 | 0.090292 |
| 0        | 0        | 0.040013 | 0.089088 | 0.016165 | 0.055597 | 0.139438 | 0.205949 | 0.054945 |
| 0.067695 | 0        | 0        | 0.014483 | 0.025388 | 0.021425 | 0.101619 | 0.116022 | 0.011569 |
| 0.042801 | 0        | 0        | 0.051256 | 0.053176 | 0.233276 | 0.041335 | 0.22882  | 0        |
| 0.054027 | 0        | 0        | 0.018852 | 0.016019 | 0.048883 | 0.074544 | 0.118178 | 0.074341 |
| 0.023966 | 0.032594 | 0        | 0.048468 | 0        | 0.168412 | 0.056732 | 0.132062 | 0        |
| 0.035536 | 0        | 0.019487 | 0.049633 | 0.047449 | 0.049648 | 0.136456 | 0.142274 | 0.017858 |
| 0.016878 | 0        | 0        | 0.0189   | 0.040211 | 0.193242 | 0.103059 | 0.218274 | 0.044621 |
| 0        | 0        | 0        | 0.039564 | 0.013541 | 0.071387 | 0.140742 | 0.138643 | 0.015577 |
| 0.065113 | 0.00952  | 0        | 0.073455 | 0.008866 | 0.117514 | 0.114738 | 0.224821 | 0.087371 |
| 0.016698 | 0        | 0        | 0.141236 | 0.031737 | 0.000936 | 0.036252 | 0.274311 | 0        |
| 0.027618 | 0.005137 | 0.03126  | 0.038637 | 0.092559 | 0.05354  | 0.075606 | 0.267927 | 0.000394 |
| 0        | 0        | 0        | 0.03971  | 0.005868 | 0.128995 | 0.092997 | 0.217281 | 0.030709 |

Supplementary table 3

|          |          |          |          |          |          |          |          |          |
|----------|----------|----------|----------|----------|----------|----------|----------|----------|
| 0.042653 | 0.005627 | 0        | 0.01543  | 0.00457  | 0.060051 | 0.110619 | 0.084033 | 0.062785 |
| 0.025711 | 0        | 0        | 0.062009 | 0.001667 | 0.178317 | 0.062588 | 0.353522 | 0.006569 |
| 0.057822 | 0.032004 | 0        | 0.062654 | 0        | 0.182677 | 0.117706 | 0.191248 | 0.000328 |
| 0.013099 | 0        | 0        | 0.023611 | 0        | 0.130683 | 0.082164 | 0.130209 | 0.037511 |
| 0        | 0        | 0        | 0.089296 | 0.027145 | 0.014091 | 0.039622 | 0.227337 | 0.003249 |
| 0.022454 | 0        | 0        | 0.063044 | 0.01386  | 0.043476 | 0.087137 | 0.107476 | 0.007539 |
| 0.030449 | 0.006303 | 0        | 0.064868 | 0.032891 | 0.057897 | 0.065355 | 0.203517 | 0        |
| 0.039365 | 0        | 0        | 0.033379 | 0.036841 | 0.068281 | 0.12164  | 0.144228 | 0.075375 |
| 0        | 0        | 0        | 0.048637 | 0.016539 | 0        | 0.118365 | 0.339599 | 0.009305 |
| 0.099112 | 0        | 0        | 0.01098  | 0.017584 | 0.171593 | 0.084895 | 0.112619 | 0.041931 |
| 0.002777 | 0        | 0        | 0.008841 | 0.010741 | 0.062021 | 0.104548 | 0.258088 | 0.006125 |
| 0.019043 | 0        | 0        | 0.064962 | 0.009657 | 0.055838 | 0.030928 | 0.370965 | 0.004296 |
| 0.024987 | 0.03759  | 0        | 0.043527 | 0.035024 | 0        | 0.009404 | 0.410532 | 0        |
| 0.019461 | 0        | 0.004506 | 0.089697 | 0.030553 | 0.083298 | 0.019756 | 0.200572 | 0.005625 |
| 0.034551 | 0        | 0.00726  | 0.001492 | 0.004971 | 0.167278 | 0.150132 | 0.13295  | 0.025772 |
| 0.030356 | 0        | 0        | 0.023425 | 0        | 0.560812 | 0.065714 | 0.129635 | 0.006671 |
| 0.011301 | 0        | 0        | 0.046367 | 0.20584  | 0.002047 | 0.050823 | 0.377474 | 0.002587 |
| 0.014283 | 0.00894  | 0        | 0.041466 | 0.019613 | 0.070442 | 0.029481 | 0.258857 | 0.012631 |
| 0.030127 | 0        | 0.034269 | 0.073839 | 0.030253 | 0.128053 | 0.047415 | 0.330473 | 0.003689 |
| 0.050864 | 0        | 0        | 0.125789 | 0.000368 | 0.191713 | 0.058324 | 0.051649 | 0.01827  |
| 0.007208 | 0.011104 | 0        | 0.041536 | 0.040691 | 0.073712 | 0.178846 | 0.133179 | 0.072686 |
| 0.003315 | 0.01557  | 0        | 0.054847 | 0.016477 | 0.013055 | 0.142118 | 0.162189 | 0.00847  |
| 0.025804 | 0.021015 | 0.029599 | 0        | 0        | 0.271302 | 0.064533 | 0.219242 | 0        |
| 0.032636 | 0        | 0        | 0.057611 | 0        | 0.068818 | 0.091811 | 0.131391 | 0.011498 |
| 0.04287  | 0        | 0.045724 | 0        | 0.032687 | 0.182857 | 0.03288  | 0.27844  | 0.045721 |
| 0.029309 | 0.02057  | 0        | 0.100978 | 0.00076  | 0.123468 | 0.109043 | 0.163085 | 0.026246 |
| 0        | 0        | 0        | 0.055574 | 0.006806 | 0.032146 | 0.118943 | 0.223158 | 0.080874 |
| 0.098396 | 0        | 0        | 0.034366 | 0.017822 | 0.197325 | 0.04573  | 0.096366 | 0.013642 |
| 0        | 0        | 0        | 0.122125 | 0.031715 | 0.062348 | 0.134767 | 0.143941 | 0.015177 |
| 0        | 0        | 0        | 0.046223 | 0.006504 | 0.096183 | 0.024514 | 0.246519 | 0.076197 |
| 0.016854 | 0.001495 | 0        | 0.020694 | 0.016091 | 0.079992 | 0.07571  | 0.145229 | 0.027829 |
| 0.041369 | 0        | 0.027489 | 0.066976 | 0.093132 | 0.018505 | 0.105144 | 0.139545 | 0.023178 |
| 0        | 0        | 0.04273  | 0.052095 | 0.081146 | 0.065608 | 0.133869 | 0.177432 | 0.023915 |
| 0.04926  | 0.052648 | 0        | 0.028326 | 0.04433  | 0.013451 | 0.07635  | 0.115953 | 0.00232  |
| 0.027843 | 0        | 0        | 0.114629 | 0        | 0.149033 | 0.074063 | 0.103774 | 0        |
| 0.017165 | 0        | 0        | 0.050452 | 0.059127 | 0.015764 | 0.0229   | 0.516942 | 0        |
| 0.061591 | 0        | 0        | 0.00872  | 0.012386 | 0.055839 | 0.055299 | 0.089121 | 0.015398 |
| 0        | 0        | 0        | 0.028106 | 0        | 0.210079 | 0.087078 | 0.118259 | 0.01892  |
| 0.009369 | 0.027388 | 0        | 0.085234 | 0        | 0.05458  | 0.073391 | 0.194671 | 0.035541 |
| 0.071208 | 0        | 0        | 0.037538 | 0        | 0.140703 | 0.092106 | 0.065199 | 0.067131 |
| 0.11651  | 0        | 0        | 0.098434 | 0.014758 | 0.081314 | 0.037271 | 0.117221 | 0.005197 |
| 0.015638 | 0        | 0        | 0.001508 | 0.012201 | 0.039365 | 0.111036 | 0.208425 | 0.006389 |
| 0.020413 | 0        | 0        | 0.024398 | 0        | 0.31523  | 0.075428 | 0.137661 | 0.037077 |
| 0.021329 | 0        | 0.004943 | 0.12693  | 0.109346 | 0.142869 | 0.016325 | 0.160391 | 0.021096 |
| 0        | 0        | 0        | 0.030883 | 0.019631 | 0.038299 | 0.129692 | 0.172614 | 0.042134 |
| 0        | 0        | 0        | 0.07546  | 0        | 0.076887 | 0        | 0.288803 | 0        |
| 0.021802 | 0        | 0        | 0.031041 | 0.04245  | 0.007989 | 0.149948 | 0.142119 | 0.207559 |
| 0.005303 | 0.029758 | 0.025702 | 0        | 0.018206 | 0.225456 | 0.100827 | 0.125866 | 0.019219 |
| 0.023101 | 0        | 0        | 0.058053 | 0.013677 | 0.034214 | 0.102952 | 0.254559 | 0.07996  |
| 0.063188 | 0        | 0        | 0.06908  | 0        | 0.218848 | 0.093437 | 0.087407 | 0.02107  |
| 0.00289  | 0        | 0        | 0.073543 | 0.034887 | 0.238748 | 0.065472 | 0.220992 | 0.008798 |
| 0.012343 | 0        | 0        | 0.100028 | 0.028795 | 0.135641 | 0.085431 | 0.277274 | 0.020537 |
| 0.047124 | 0        | 0        | 0.077869 | 0.004627 | 0.122672 | 0.086271 | 0.205678 | 0.106285 |
| 0.013088 | 0.010781 | 0        | 0.052296 | 0.045687 | 0.287488 | 0.037198 | 0.18189  | 0        |
| 0.007476 | 0        | 0        | 0.111389 | 0.015031 | 0.046787 | 0.182346 | 0.114457 | 0.018828 |
| 0.036646 | 0        | 0        | 0.030974 | 0.003167 | 0.033257 | 0.08413  | 0.065477 | 0        |
| 0.03972  | 0.001465 | 0        | 0.039132 | 0.016367 | 0.014839 | 0.039782 | 0.226857 | 0.090903 |
| 0.034753 | 0        | 0        | 0.082779 | 0.02344  | 0.195773 | 0.037753 | 0.158022 | 0        |

Supplementary table 3

|          |          |          |          |          |          |          |          |          |
|----------|----------|----------|----------|----------|----------|----------|----------|----------|
| 0.021773 | 0        | 0        | 0.088166 | 0.011701 | 0.304702 | 0.003952 | 0.232996 | 0        |
| 0.045962 | 0        | 0        | 0.106214 | 0.017585 | 0.097861 | 0.075242 | 0.129582 | 0.014267 |
| 0.020581 | 0        | 0        | 0.058952 | 0.033005 | 0.105545 | 0.087379 | 0.261634 | 0        |
| 0.043572 | 0        | 0.004034 | 0.027125 | 0.015326 | 0.243384 | 0.094948 | 0.130357 | 0.019162 |
| 0.032221 | 0        | 0        | 0.03584  | 0.10321  | 0.019823 | 0.084507 | 0.202126 | 0.037107 |
| 0.003419 | 0        | 0.025938 | 0.015337 | 0.014383 | 0.03672  | 0.104633 | 0.227767 | 0.039843 |
| 0.016934 | 0        | 0.00828  | 0.046091 | 0.012606 | 0.134336 | 0.098475 | 0.16933  | 0.019468 |
| 0.07297  | 0        | 0        | 0.038138 | 0.003274 | 0.03722  | 0.05467  | 0.438343 | 0        |
| 0.0236   | 0.00204  | 0        | 0.072765 | 0.014007 | 0.022611 | 0.056627 | 0.16756  | 0.031099 |
| 0.018005 | 0.012153 | 0        | 0.040225 | 0        | 0.302604 | 0.082123 | 0.135833 | 0.046379 |
| 0.059712 | 0        | 0        | 0.022656 | 0.018047 | 0.170416 | 0.059975 | 0.051506 | 0.030191 |
| 0.06325  | 0        | 0        | 0.047507 | 0        | 0.082482 | 0.050027 | 0.07654  | 0.088782 |
| 0.007138 | 0.016445 | 0        | 0.116082 | 0.069023 | 0.033826 | 0.094199 | 0.112574 | 0.020856 |
| 0.032644 | 0        | 0        | 0.040913 | 0        | 0.168136 | 0.035925 | 0.280856 | 0.000178 |
| 0.045645 | 0        | 0.007418 | 0.021239 | 0.007878 | 0.103535 | 0.061247 | 0.194025 | 0.014475 |
| 0.045571 | 0        | 0        | 0.04228  | 0.009684 | 0.122664 | 0.059494 | 0.201186 | 0.012561 |
| 0.099178 | 0.005287 | 0        | 0.038713 | 0        | 0.19422  | 0.067403 | 0.064298 | 0        |
| 0.019456 | 0.001839 | 0        | 0.066713 | 0        | 0.150827 | 0.137572 | 0.155775 | 0.033899 |
| 0.066944 | 0.000184 | 0        | 0.04546  | 0.016721 | 0        | 0.092838 | 0.174845 | 0.054646 |
| 0.003996 | 0.009577 | 0.004169 | 0.019288 | 0.022283 | 0.025333 | 0.047294 | 0.19314  | 0        |
| 0        | 0        | 0        | 0.07358  | 0.006392 | 0.016875 | 0.062741 | 0.131394 | 0.012338 |
| 0.023829 | 0        | 0        | 0.079846 | 0.017248 | 0.04945  | 0.05952  | 0.217754 | 0.002769 |
| 0.006046 | 0        | 0.013091 | 0.024683 | 0.0426   | 0.119413 | 0.073023 | 0.238486 | 0.004886 |
| 0        | 0        | 0        | 0.143623 | 0.102108 | 0.033399 | 0.129013 | 0.151816 | 0.009832 |
| 0.052304 | 0        | 0        | 0.023447 | 0        | 0.232617 | 0.095553 | 0.071646 | 0.045712 |
| 0        | 0        | 0.05373  | 0        | 0.001572 | 0.068137 | 0.186636 | 0.284583 | 0.001617 |
| 0        | 0        | 0.070326 | 0.103938 | 0.061106 | 0.026053 | 0.074923 | 0.252839 | 0.001955 |
| 0.014035 | 0.000719 | 0        | 0.037919 | 0        | 0.119526 | 0.127451 | 0.244189 | 0.032949 |
| 0.040311 | 0        | 0        | 0.021693 | 0.019608 | 0.113896 | 0.063716 | 0.072821 | 0.00574  |
| 0.043329 | 0        | 0        | 0.03808  | 0        | 0.321257 | 0.040852 | 0.15854  | 0.025244 |
| 0.028609 | 0.051504 | 0        | 0.03316  | 0.023398 | 0.192319 | 0.047036 | 0.206457 | 0.017636 |
| 0        | 0.015027 | 0.015115 | 0.018002 | 0.002059 | 0.129051 | 0.077151 | 0.225696 | 0.055458 |
| 0.088319 | 0        | 0        | 0.076139 | 0.020233 | 0.131223 | 0.055528 | 0.148348 | 0.010687 |
| 0.069962 | 0        | 0        | 0.0481   | 0.004644 | 0.180064 | 0.098822 | 0.092237 | 0.032288 |
| 0.030217 | 0        | 0        | 0.018424 | 0.02056  | 0.059216 | 0.116511 | 0.156768 | 0.054318 |
| 0.017827 | 0        | 0        | 0.03104  | 0.047344 | 0.005415 | 0.048021 | 0.132672 | 0.033115 |
| 0.058168 | 0        | 0.002871 | 0.026399 | 0.008049 | 0.107137 | 0.151313 | 0.093276 | 0.054035 |
| 0.004437 | 0.102439 | 0        | 0.054028 | 0.01862  | 0.17136  | 0.026394 | 0.235556 | 0.010406 |
| 0.044545 | 0.026727 | 0        | 0.005125 | 0        | 0.116049 | 0.110024 | 0.184099 | 0.013622 |
| 0        | 0        | 0.203131 | 0.017887 | 0.035672 | 0.013743 | 0.088861 | 0.259495 | 0.023736 |
| 0.074201 | 0        | 0        | 0.045833 | 0.026834 | 0.040564 | 0.026837 | 0.152639 | 0.115316 |
| 0.045761 | 0        | 0        | 0.014896 | 0.009233 | 0.459904 | 0.078087 | 0.019777 | 0.108258 |
| 0        | 0        | 0.030877 | 0.077753 | 0.051751 | 0.11925  | 0.146363 | 0.16877  | 0.022963 |
| 0.066706 | 0.022546 | 0        | 0.070085 | 0        | 0.11146  | 0.111285 | 0.142964 | 0.036075 |
| 0.003516 | 0.039794 | 0        | 0        | 0.022385 | 0.040567 | 0.091365 | 0.242186 | 0        |
| 0        | 0.096955 | 0        | 0.124194 | 0.001507 | 0.20071  | 0.07405  | 0.260489 | 0.001652 |
| 0.050128 | 0        | 0        | 0.064458 | 0.018252 | 0.029398 | 0.072811 | 0.124526 | 0.097422 |
| 0.076757 | 0        | 0        | 0.003152 | 0.011207 | 0.0366   | 0.133846 | 0.181734 | 0.007559 |
| 0.064039 | 0        | 0.007943 | 0.033515 | 0.026555 | 0.021436 | 0.113333 | 0.118756 | 0.023228 |
| 0.056883 | 0.026277 | 0        | 0.07048  | 0.005209 | 0.05204  | 0.063681 | 0.133676 | 0.033779 |
| 0.05523  | 0.038439 | 0        | 0.03159  | 0        | 0        | 0.061325 | 0.201112 | 0        |
| 0.009142 | 0        | 0        | 0.030279 | 0        | 0.317043 | 0.04865  | 0.218997 | 0        |
| 0        | 0.020736 | 0        | 0.095914 | 0.042645 | 0.076101 | 0.052234 | 0.537977 | 0        |
| 0.014327 | 0        | 0        | 0.03898  | 0.000579 | 0.419934 | 0.030955 | 0.07077  | 0.009304 |
| 0.020214 | 0        | 0        | 0.031076 | 0.004236 | 0.406732 | 0.046406 | 0.130969 | 0.004074 |
| 0.051608 | 0        | 0        | 0.039382 | 0.005986 | 0.048296 | 0.030694 | 0.150192 | 0.115586 |
| 0.067426 | 0.002829 | 0        | 0.067344 | 0.005085 | 0.051677 | 0.112112 | 0.167773 | 0.078265 |
| 0.057112 | 0        | 0        | 0.090617 | 0.022223 | 0.101664 | 0.066298 | 0.16398  | 0.034878 |

Supplementary table 3

|          |          |          |          |          |          |          |          |          |
|----------|----------|----------|----------|----------|----------|----------|----------|----------|
| 0.001391 | 0        | 0        | 0        | 0.066694 | 0.189049 | 0.037896 | 0        | 0.012813 |
| 0.000528 | 0        | 0        | 0.052322 | 0.017418 | 0        | 0.093659 | 0.282445 | 0.009205 |
| 0.032395 | 0        | 0        | 0.058647 | 0.023269 | 0.109043 | 0.098628 | 0.122474 | 0.01658  |
| 0.009249 | 0        | 0        | 0.021658 | 0.030868 | 0.11829  | 0.130505 | 0.163562 | 0.040796 |
| 0.052778 | 0        | 0        | 0.019593 | 0.01013  | 0.084389 | 0.076162 | 0.145613 | 0.031364 |
| 0.000977 | 0        | 0        | 0.065025 | 0.051594 | 0.039134 | 0.058961 | 0.17986  | 0.015023 |
| 0        | 0.04647  | 0.001126 | 0.077374 | 0.042491 | 0.002351 | 0.134393 | 0.258383 | 0        |
| 0.003797 | 0        | 0        | 0.052757 | 0.052049 | 0.120584 | 0.08736  | 0.321848 | 0.008318 |
| 0        | 0        | 0.080876 | 0.045943 | 0.026699 | 0.031833 | 0.037246 | 0.358204 | 0.011313 |
| 0.03828  | 0.016742 | 0        | 0.027661 | 0.008208 | 0        | 0.11644  | 0.220233 | 0.072621 |
| 0.012692 | 0        | 0        | 0.034223 | 0.006799 | 0.110137 | 0.06033  | 0.123788 | 0.347043 |
| 0.055057 | 0        | 0.014991 | 0.01616  | 0.016465 | 0.046532 | 0.111148 | 0.064709 | 0.070456 |
| 0.012912 | 0        | 0.012868 | 0.057741 | 0.093446 | 0.058404 | 0.082391 | 0.178171 | 0.064695 |
| 0        | 0        | 0        | 0.049303 | 0        | 0.128839 | 0.045163 | 0.244767 | 0.000903 |
| 0.023311 | 0        | 0.051801 | 0.059026 | 0.075085 | 0.109804 | 0.043098 | 0.267342 | 0.001845 |
| 0        | 0        | 0        | 0.032174 | 0.204616 | 0.032456 | 0.05577  | 0.20841  | 0.006776 |
| 0.062347 | 0        | 0        | 0.030713 | 0        | 0.422503 | 0.068904 | 0.085115 | 0.028218 |
| 0        | 0.04366  | 0.044695 | 0.018358 | 0.096545 | 0        | 0.082313 | 0.258895 | 0.000678 |
| 0.00146  | 0        | 0        | 0.025431 | 0.001427 | 0.079884 | 0.035619 | 0.34998  | 0        |
| 0.04197  | 0        | 0        | 0.090011 | 0.107103 | 0.078495 | 0.044576 | 0.269516 | 0.023771 |
| 0.058881 | 0        | 0        | 0.068946 | 0.022281 | 0.053124 | 0.066676 | 0.263052 | 0.011189 |
| 0        | 0        | 0        | 0.028289 | 0.031057 | 0.001476 | 0.148522 | 0.136887 | 0        |
| 0.078195 | 0        | 0        | 0.077818 | 0.010041 | 0.172173 | 0.054583 | 0.133645 | 0.029327 |
| 0.04903  | 0        | 0        | 0.088525 | 0.030654 | 0.007513 | 0.076917 | 0.076012 | 0.005103 |
| 0.022446 | 0.003129 | 0        | 0.082706 | 0        | 0.244967 | 0.077519 | 0.146464 | 0.024031 |
| 0.043842 | 0        | 0        | 0.066503 | 0.017095 | 0.059138 | 0.050699 | 0.116185 | 0.059035 |
| 0        | 0.016715 | 0        | 0.093632 | 0.01466  | 0.086254 | 0.061324 | 0.120655 | 0.000652 |
| 0.026051 | 0        | 0.01837  | 0.030122 | 0.001526 | 0.222861 | 0.073531 | 0.231193 | 0.017191 |
| 0.017225 | 0        | 0.001691 | 0.002583 | 0        | 0.578106 | 0.03291  | 0.120324 | 0        |
| 0.065358 | 0        | 0        | 0.077329 | 0.002019 | 0        | 0.059539 | 0.215578 | 0.151395 |
| 0.010242 | 0        | 0        | 0.120911 | 0.015725 | 0.067193 | 0.06196  | 0.118171 | 0        |
| 0.056053 | 0        | 0        | 0.042632 | 0        | 0.058521 | 0.05073  | 0.074038 | 0.120471 |
| 0        | 0        | 0        | 0.01171  | 0        | 0.112399 | 0.103202 | 0.218464 | 0        |
| 0.057384 | 0        | 0        | 0.049115 | 0.010267 | 0.064347 | 0.086278 | 0.113315 | 0.076455 |
| 0.020414 | 0        | 0        | 0.107558 | 0        | 0.383729 | 0.016047 | 0.120986 | 0.005362 |
| 0.017141 | 0.019325 | 0        | 0.05977  | 0        | 0.126875 | 0.144911 | 0.075344 | 0.008983 |
| 0.0654   | 0        | 0        | 0.089587 | 0        | 0.159606 | 0.053266 | 0.047791 | 0.003948 |
| 0        | 0.039302 | 0        | 0.089326 | 0.01083  | 0.069423 | 0.107727 | 0.244384 | 0.008759 |
| 0.017276 | 0.038347 | 0        | 0.05378  | 0        | 0.052754 | 0.064454 | 0.325997 | 0        |
| 0        | 0        | 0        | 0.004758 | 0.039288 | 0.036807 | 0.123432 | 0.260461 | 0.014352 |
| 0.028278 | 0        | 0        | 0.035517 | 0.025748 | 0.090239 | 0.162913 | 0.168495 | 0.029653 |
| 0.05912  | 0        | 0        | 0.062452 | 0.030121 | 0        | 0.038551 | 0.414729 | 0.008434 |
| 0.007342 | 0.053159 | 0        | 0.063011 | 0.053794 | 0        | 0.110913 | 0.163534 | 0        |
| 0.008354 | 0        | 0        | 0.064411 | 0.035387 | 0.181968 | 0.079779 | 0.376827 | 0        |
| 0.022662 | 0        | 0.049871 | 0.041983 | 0.027975 | 0.038227 | 0.045252 | 0.331336 | 0.005876 |
| 0.033163 | 0        | 0.055372 | 0.000513 | 0.000145 | 0.111325 | 0.061024 | 0.262349 | 0.019086 |
| 0.000767 | 0        | 0.032834 | 0.004755 | 0.001647 | 0.105883 | 0.055494 | 0.138627 | 0.020602 |
| 0.055088 | 0        | 0        | 0.033503 | 0.010734 | 0.062979 | 0.141147 | 0.087852 | 0.119937 |
| 0.019788 | 0        | 0.202256 | 0        | 0.024348 | 0.327325 | 0.022903 | 0.018376 | 0        |
| 0        | 0        | 0.087007 | 0.049922 | 0.038571 | 0.049924 | 0.066229 | 0.305597 | 0        |
| 0.112871 | 0        | 0        | 0.077783 | 0.008143 | 0.074348 | 0.090344 | 0.147813 | 0.014461 |
| 0.058907 | 0        | 0.010191 | 0.058989 | 0.000845 | 0.155494 | 0.064505 | 0.149288 | 0.002154 |
| 0.032669 | 0.027973 | 0.02863  | 0        | 0.003759 | 0.362048 | 0.030312 | 0.281    | 0.077197 |
| 0.012507 | 0        | 0        | 0.126634 | 0.018909 | 0.108495 | 0.07511  | 0.210916 | 0.034539 |
| 0.003608 | 0        | 0        | 0.100852 | 0.136982 | 0.179043 | 0.028793 | 0.14763  | 0        |
| 0.017219 | 0.051993 | 0        | 0.020943 | 0        | 0.306846 | 0.091624 | 0.186956 | 0.003301 |
| 0.027933 | 0.011098 | 0        | 0.109607 | 0.014852 | 0.013181 | 0.010926 | 0.124544 | 0.001333 |
| 0.034882 | 0        | 0        | 0.024742 | 0.029194 | 0.169817 | 0.112597 | 0.060033 | 0.024086 |

Supplementary table 3



|          |          |          |          |          |          |          |          |          |
|----------|----------|----------|----------|----------|----------|----------|----------|----------|
| 0.07068  | 0        | 0        | 0.023874 | 0.004934 | 0.170674 | 0.090183 | 0.099722 | 0.0429   |
| 0.003227 | 0.028504 | 0.003817 | 0.068261 | 0.059984 | 0.033725 | 0.104518 | 0.133582 | 0.05019  |
| 0.044665 | 0        | 0        | 0.03409  | 0.015527 | 0.027495 | 0.064758 | 0.255571 | 0.200605 |
| 0        | 0        | 0        | 0.042383 | 0        | 0.009229 | 0.068841 | 0.260516 | 0.051023 |
| 0.061676 | 0        | 0        | 0.052357 | 0        | 0.069557 | 0.086214 | 0.26886  | 0.050374 |
| 0.169074 | 0.001316 | 0.008045 | 0.004579 | 0.006129 | 0.106567 | 0.074139 | 0.152483 | 0        |
| 0.029869 | 0        | 0        | 0.055639 | 0.001574 | 0.197724 | 0.081901 | 0.038891 | 0.081748 |
| 0.045875 | 0        | 0        | 0.055407 | 0.033995 | 0.051957 | 0.082465 | 0.163742 | 0.026224 |
| 0        | 0.020709 | 0        | 0.074575 | 0        | 0.036745 | 0.05074  | 0.19316  | 0.009419 |
| 0.039031 | 0        | 0        | 0.041027 | 0.00104  | 0.077173 | 0.077223 | 0.136079 | 0.059439 |
| 0.031334 | 0        | 0        | 0.007959 | 0        | 0.251264 | 0.058013 | 0.134765 | 0.022591 |
| 0.02798  | 0.020756 | 0        | 0.097111 | 0.00273  | 0.088585 | 0.133194 | 0.106922 | 0.080874 |
| 0.10243  | 0        | 0        | 0.020237 | 0.004678 | 0.293809 | 0.065617 | 0.129432 | 0.014676 |
| 0.058621 | 0        | 0        | 0.046979 | 0        | 0.411454 | 0.03392  | 0.148539 | 0.012873 |
| 0.026648 | 0        | 0        | 0.095776 | 0.040632 | 0.146664 | 0.099876 | 0.329851 | 0.003273 |
| 0.030422 | 0        | 0.009407 | 0.022207 | 0.041711 | 0.015567 | 0.059976 | 0.118631 | 0.082906 |
| 0.052447 | 0.001347 | 0        | 0.082166 | 0.035224 | 0.024425 | 0.12368  | 0.242128 | 0.023291 |
| 0.059867 | 0.013178 | 0        | 0        | 0        | 0.079701 | 0.083302 | 0.044114 | 0        |
| 0        | 0.051157 | 0        | 0.077393 | 0.004335 | 0.046455 | 0.062802 | 0.209273 | 0.033353 |
| 0.015922 | 0        | 0.026813 | 0.009435 | 0.034835 | 0.110146 | 0.054707 | 0.266246 | 0.045074 |
| 0.04237  | 0        | 0.040952 | 0.029431 | 0.038451 | 0.09127  | 0.078526 | 0.231589 | 0.022568 |
| 0.045913 | 0        | 0        | 0.054637 | 0.015267 | 0.189921 | 0.072036 | 0.229314 | 0.027598 |
| 0.064077 | 0.021458 | 0        | 0.080689 | 0.001137 | 0.099189 | 0.119422 | 0.061504 | 0.036589 |
| 0.085301 | 0.074084 | 0.045243 | 0.039926 | 0        | 0.161781 | 0.084328 | 0.085958 | 0.004596 |
| 0        | 0        | 0        | 0.000603 | 0.018682 | 0.145412 | 0.202707 | 0.047396 | 0.020469 |
| 0        | 0        | 0        | 0.079729 | 0.02405  | 0.116738 | 0.125212 | 0.196473 | 0.045533 |
| 0.035546 | 0        | 0        | 0.094002 | 0.016243 | 0.231474 | 0.090338 | 0.149293 | 0.024531 |
| 0.040593 | 0.00761  | 0.015478 | 0        | 0        | 0.627462 | 0.073978 | 0.101046 | 0.003108 |
| 0.026787 | 0.003971 | 0        | 0.0296   | 0.005597 | 0.201782 | 0.15922  | 0.288488 | 0.039903 |
| 0.011674 | 0        | 0        | 0.105566 | 0.014457 | 0.071011 | 0.129294 | 0.048703 | 0.061697 |
| 0.069546 | 0        | 0        | 0.031558 | 0.022097 | 0.26911  | 0.070095 | 0.058601 | 0.013553 |
| 0.033005 | 0.027012 | 0        | 0.048787 | 0.015089 | 0.025039 | 0.153741 | 0.216183 | 0.005246 |
| 0.012608 | 0        | 0        | 0.058086 | 0        | 0.245876 | 0.038656 | 0.168888 | 0.043742 |
| 0.057354 | 0.03249  | 0        | 0.045232 | 0.016364 | 0.061856 | 0.083176 | 0.119605 | 0.0194   |
| 0.054653 | 0.024312 | 0        | 0.076779 | 0.036022 | 0.041319 | 0.085952 | 0.138474 | 0.040673 |
| 0.004768 | 0        | 0        | 0.069976 | 0.01751  | 0.118083 | 0.102091 | 0.157456 | 0.012384 |
| 0.045099 | 0.034886 | 0        | 0.095682 | 0.008228 | 0.007983 | 0.055679 | 0.051911 | 0.021713 |
| 0        | 0        | 0        | 0.052892 | 0.091027 | 0.047707 | 0.105319 | 0.304689 | 0        |
| 0.01319  | 0        | 0        | 0.057148 | 0        | 0.151419 | 0.047511 | 0.228114 | 0.100857 |
| 0.008651 | 0        | 0        | 0.067023 | 0.023282 | 0.117626 | 0.117767 | 0.13059  | 0.011465 |
| 0.011946 | 0        | 0        | 0.067713 | 0.079531 | 0.116611 | 0.162062 | 0.117458 | 0.027574 |
| 0.058447 | 0.003354 | 0        | 0.061424 | 0.017656 | 0.053883 | 0.070107 | 0.110625 | 0.035795 |
| 0.006256 | 0.026104 | 0.107051 | 0        | 0        | 0.069442 | 0.075772 | 0.273819 | 0        |
| 0.010743 | 0        | 0.066487 | 0.050676 | 0.050862 | 0.025151 | 0.057812 | 0.194465 | 0        |
| 0.010344 | 0        | 0        | 0        | 0.004104 | 0.054932 | 0.040402 | 0.211884 | 0.001981 |
| 0.065394 | 0        | 0.020772 | 0.038377 | 0        | 0.180296 | 0.044031 | 0.176211 | 0.059308 |
| 0.039169 | 0.011215 | 0        | 0.013591 | 0.01064  | 0        | 0.128811 | 0.228386 | 0.012679 |
| 0.005973 | 0        | 0        | 0.028539 | 0.007499 | 0.150175 | 0.10876  | 0.149776 | 0.018994 |
| 0.060384 | 0.055385 | 0        | 0.02758  | 0        | 0.056707 | 0.081613 | 0.148753 | 0.007543 |
| 0.074999 | 0        | 0        | 0.050242 | 0        | 0.172293 | 0.094713 | 0.051885 | 0.007437 |
| 0.043221 | 0        | 0        | 0.034214 | 0        | 0.303522 | 0.020279 | 0        | 0.121171 |
| 0        | 0.023838 | 0        | 0.085833 | 0.137655 | 0.033918 | 0.087418 | 0.308599 | 0        |
| 0.061454 | 0        | 0        | 0.085445 | 0.028035 | 0.333266 | 0.073741 | 0.031968 | 0.02476  |
| 0        | 0        | 0        | 0.067343 | 0.037991 | 0.021976 | 0.038716 | 0.301203 | 0.013849 |
| 0.089558 | 0        | 0        | 0.117163 | 0.028792 | 0.037829 | 0        | 0.103788 | 0        |
| 0        | 0        | 0.035712 | 0.036777 | 0.008257 | 0        | 0.017769 | 0.292266 | 0        |
| 0.000519 | 0        | 0        | 0.109588 | 0.048468 | 0.074619 | 0.125809 | 0.133038 | 0.016189 |
| 0.065942 | 0.00161  | 0        | 0.035534 | 0.011956 | 0.062623 | 0.111749 | 0.179005 | 0.059034 |

Supplementary table 3

|          |          |          |          |          |          |          |          |          |
|----------|----------|----------|----------|----------|----------|----------|----------|----------|
| 0.013619 | 0        | 0        | 0.028153 | 0.047202 | 0.04444  | 0.167205 | 0.181993 | 0.015113 |
| 0        | 0        | 0        | 0        | 0.091457 | 0        | 0.076777 | 0.278803 | 0        |
| 0.01578  | 0.06923  | 0        | 0.003316 | 0        | 0.239725 | 0.019975 | 0.289498 | 0.028353 |
| 0.043296 | 0        | 0        | 0.139023 | 0.057915 | 0.068314 | 0.070887 | 0.345713 | 0.018376 |
| 0.003215 | 0        | 0.006132 | 0.050587 | 0.012733 | 0.055249 | 0.128561 | 0.091272 | 0.126879 |
| 0.004955 | 0        | 0.014107 | 0.01303  | 0.002007 | 0.196653 | 0.20396  | 0.157894 | 0.011302 |
| 0.015295 | 0.016683 | 0.005139 | 0.015643 | 0.092605 | 0.044503 | 0.064662 | 0.338442 | 0        |
| 0        | 0        | 0.024975 | 0.089959 | 0.016092 | 0.015945 | 0.072526 | 0.188572 | 0        |
| 0        | 0        | 0        | 0.079998 | 0.055927 | 0.153021 | 0.181449 | 0.000854 | 0.008997 |
| 0.030156 | 0        | 0        | 0.009091 | 0.028622 | 0.364873 | 0.066539 | 0.13991  | 0.018515 |
| 0.05374  | 0.051634 | 0        | 0.067166 | 0.001822 | 0.161907 | 0.066339 | 0.243639 | 0.014967 |
| 0.014406 | 0        | 0        | 0.043543 | 0.014893 | 0.279573 | 0.05245  | 0.269842 | 0.016945 |
| 0.036632 | 0        | 0        | 0.077545 | 0.018035 | 0.153837 | 0.082853 | 0.24584  | 0.011999 |
| 0.017555 | 0.021111 | 0        | 0.034824 | 0.013293 | 0.052555 | 0.162525 | 0.145717 | 0.006439 |
| 0.044114 | 0        | 0        | 0.045826 | 0.033182 | 0.082706 | 0.062566 | 0.31157  | 0.004524 |
| 0.091822 | 0        | 0        | 0.051046 | 0.006438 | 0.013753 | 0.207497 | 0.114885 | 0.024158 |
| 0.062203 | 0        | 0        | 0.031699 | 0.086669 | 0.097638 | 0.060524 | 0.18117  | 0.063996 |
| 0        | 0.122213 | 0        | 0.027839 | 0        | 0        | 0.104237 | 0.278017 | 0.017846 |
| 0        | 0        | 0.111796 | 0.00881  | 0        | 0.025595 | 0.085034 | 0.400868 | 0.010935 |
| 0.028313 | 0        | 0        | 0.100018 | 0.034747 | 0.012704 | 0.034691 | 0.172085 | 0.012202 |
| 0.013018 | 0        | 0.076637 | 0.000751 | 0.079175 | 0.31588  | 0.075298 | 0.163463 | 0.008732 |
| 0        | 0        | 0        | 0.07412  | 0.035484 | 0.01252  | 0.050621 | 0.495868 | 0.011462 |
| 0.025506 | 0.057916 | 0        | 0.082392 | 0.00699  | 0.04608  | 0.107854 | 0.086473 | 0.03812  |
| 0.041663 | 0        | 0        | 0.070496 | 0        | 0.231089 | 0.079338 | 0.260319 | 0.00285  |
| 0        | 0.01806  | 0        | 0.054226 | 0.013595 | 0.014672 | 0.119958 | 0.189192 | 0.013952 |
| 0.07333  | 0        | 0        | 0.066347 | 0.00659  | 0.134681 | 0.086642 | 0.08138  | 0.005188 |
| 0        | 0.019255 | 0        | 0.032565 | 0        | 0.309268 | 0.157627 | 0        | 0.007037 |
| 0.02145  | 0        | 0        | 0.120266 | 0        | 0.390899 | 0.057623 | 0.045245 | 0.120934 |
| 0.052305 | 0        | 0        | 0.000286 | 0.01177  | 0.21695  | 0.046938 | 0.068328 | 0.039811 |
| 0.014176 | 0        | 0        | 0.059827 | 0.027422 | 0.062244 | 0.05045  | 0.072982 | 0.135081 |
| 0.011754 | 0.007509 | 0        | 0        | 0        | 0        | 0.103512 | 0.201158 | 0.140852 |
| 0.034711 | 0        | 0        | 0.056554 | 0.025742 | 0.123663 | 0.091028 | 0.10557  | 0.024606 |
| 0.058673 | 0.054312 | 0.024248 | 0.058868 | 0        | 0.048047 | 0.060628 | 0.401841 | 0        |
| 0.033484 | 0        | 0        | 0.010294 | 0.017808 | 0.005168 | 0.043787 | 0.154679 | 0.086868 |
| 0        | 0        | 0        | 0.062047 | 0        | 0.323745 | 0.030755 | 0.203938 | 0        |
| 0.003823 | 0        | 0        | 0.066793 | 0.020122 | 0.048385 | 0.164392 | 0.098936 | 0.043646 |
| 0.004854 | 0        | 0        | 0.017341 | 0.009605 | 0.124199 | 0.080271 | 0.166253 | 0.0569   |
| 0.014686 | 0        | 0        | 0.00773  | 0        | 0.484038 | 0.10015  | 0.155584 | 0.001898 |
| 0.007824 | 0        | 0        | 0.102284 | 0.007893 | 0.072074 | 0.22943  | 0.112721 | 0.031715 |
| 0.053762 | 0        | 0        | 0.110289 | 0        | 0.170384 | 0.142911 | 0.032631 | 0.012442 |
| 0.00151  | 0        | 0        | 0.046472 | 0        | 0.184197 | 0.099299 | 0.127784 | 0.013182 |
| 0.053589 | 0.020012 | 0        | 0.052139 | 0.000163 | 0        | 0.079887 | 0.166979 | 0.024334 |
| 0.047852 | 0.009002 | 0        | 0.080232 | 0.011349 | 0.120971 | 0.056647 | 0.199116 | 0.024934 |
| 0.021351 | 0        | 0        | 0.050237 | 0.013673 | 0.045375 | 0.17235  | 0.120498 | 0.048382 |
| 0.019083 | 0        | 0        | 0.071073 | 0        | 0.197561 | 0.073933 | 0.288669 | 0.059648 |
| 0.066434 | 0        | 0        | 0.043049 | 0.01854  | 0.067272 | 0.146389 | 0.184105 | 0.017181 |
| 0.053394 | 0        | 0        | 0.09671  | 0.018085 | 0.083385 | 0.066329 | 0.055199 | 0.014594 |
| 0.043654 | 0.004056 | 0        | 0.059091 | 0.018995 | 0        | 0.084408 | 0.22196  | 0.109261 |
| 0.001984 | 0.017695 | 0        | 0.123431 | 0.019631 | 0.076203 | 0.094248 | 0.171062 | 0        |
| 0        | 0        | 0        | 0.047351 | 0.023753 | 0.00098  | 0.105783 | 0.143004 | 0.010042 |
| 0        | 0.070508 | 0        | 0.045398 | 0.046535 | 0.039405 | 0.098725 | 0.202601 | 0.008776 |
| 0.007709 | 0        | 0.007313 | 0.069794 | 0.036499 | 0.05566  | 0.073352 | 0.302393 | 0.016003 |
| 0.005651 | 0.01758  | 0        | 0.04063  | 0.026828 | 0.053548 | 0.11962  | 0.225898 | 0        |
| 0.057653 | 0        | 0        | 0.073173 | 0.001831 | 0.104877 | 0.040642 | 0.106295 | 0.015671 |
| 0        | 0        | 0        | 0.077456 | 0        | 0.151848 | 0.05725  | 0.120283 | 0        |
| 0.003038 | 0.030663 | 0        | 0.041534 | 0.037787 | 0.165514 | 0.194837 | 0.068365 | 0.034104 |
| 0.064867 | 0        | 0        | 0.053311 | 0.017017 | 0.041718 | 0.064495 | 0.101196 | 0.0047   |
| 0        | 0        | 0        | 0.067282 | 0.008995 | 0.061198 | 0.06099  | 0.173878 | 0.03371  |

Supplementary table 3

|          |          |          |          |          |          |          |          |          |
|----------|----------|----------|----------|----------|----------|----------|----------|----------|
| 0        | 0        | 0.046031 | 0.070892 | 0.018816 | 0.173271 | 0.061088 | 0.213587 | 0.020615 |
| 0.005958 | 0.010111 | 0        | 0.054796 | 0.028125 | 0.058813 | 0.117224 | 0.143154 | 0.015818 |
| 0.064896 | 0        | 0.11427  | 0        | 0.066898 | 0.393486 | 0        | 0.138415 | 0        |
| 0.047746 | 0        | 0.043668 | 0.068497 | 0.057697 | 0.033247 | 0.035324 | 0.193124 | 0.007828 |
| 0.093904 | 0        | 0        | 0.029615 | 0        | 0.22061  | 0.061117 | 0.093125 | 0.013172 |
| 0.033195 | 0        | 0        | 0.050382 | 0        | 0.525176 | 0.021123 | 0.020754 | 0        |
| 0.049283 | 0        | 0        | 0.028486 | 0.082427 | 0.172063 | 0.001246 | 0.334089 | 0.00583  |
| 0.008663 | 0.040205 | 0        | 0.0785   | 0.000142 | 0.004992 | 0.110177 | 0.158783 | 0        |
| 0        | 0.034346 | 0        | 0.112858 | 0.016721 | 0        | 0.128673 | 0.269868 | 0        |
| 0.069311 | 0        | 0        | 0.05069  | 0.029497 | 0.055425 | 0.14291  | 0.179938 | 0.0134   |
| 0.107553 | 0        | 0        | 0.056389 | 0.035665 | 0.032564 | 0.056896 | 0.160893 | 0        |
| 0.006846 | 0        | 0        | 0.114588 | 0.086214 | 0.025922 | 0.119182 | 0.260469 | 0        |
| 0.012846 | 0        | 0.001958 | 0.058277 | 0.035208 | 0.098195 | 0.021671 | 0.280378 | 0.012476 |
| 0.024856 | 0.004209 | 0        | 0.02407  | 0.000408 | 0.03418  | 0.076689 | 0.105679 | 0.030094 |
| 0.057297 | 0.01535  | 0        | 0.043487 | 0.024589 | 0.128425 | 0.071437 | 0.251149 | 0.180731 |
| 0.085118 | 0        | 0        | 0.031501 | 0.016632 | 0.128704 | 0.054509 | 0.204271 | 0.045079 |
| 0.048081 | 0        | 0        | 0.035789 | 0.033516 | 0.126196 | 0.13644  | 0.238664 | 0.02833  |
| 0.001871 | 0        | 0        | 0.057769 | 0.039556 | 0.164117 | 0        | 0.456497 | 0.000411 |
| 0.037561 | 0        | 0        | 0.100008 | 0        | 0.400243 | 0.095022 | 0.090038 | 0.001151 |

Supplementary table 3

| Dendritic c | Mast cells | Mast cells | Eosinophil | Neutrophil | P-value | Correlation | RMSE     |
|-------------|------------|------------|------------|------------|---------|-------------|----------|
| 0           | 0.061784   | 0          | 0          | 0.043775   | 0.251   | 0.050774    | 1.062903 |
| 0           | 0.075529   | 0          | 0          | 0.000716   | 0.062   | 0.136161    | 1.029371 |
| 0           | 0          | 0.019792   | 0          | 0.0091     | 0.271   | 0.047196    | 1.078243 |
| 0           | 0.119019   | 0          | 0          | 0.002532   | 0.578   | 0.00328     | 1.079488 |
| 0.01475     | 0          | 0.040961   | 0          | 0.104249   | 0.228   | 0.055911    | 1.079927 |
| 0           | 0.022389   | 0          | 0          | 0.032514   | 0.222   | 0.057935    | 1.0727   |
| 0           | 0.031064   | 0          | 0          | 0.006902   | 0.231   | 0.055429    | 1.067325 |
| 0           | 0          | 0.061983   | 0          | 0.009377   | 0.164   | 0.073434    | 1.056346 |
| 0           | 0          | 0.10791    | 0          | 0.093512   | 0.143   | 0.081016    | 1.053435 |
| 0           | 0.010226   | 0          | 0          | 0.003909   | 0.136   | 0.085232    | 1.060085 |
| 0           | 0          | 0.014754   | 0          | 0.009299   | 0.187   | 0.066452    | 1.065343 |
| 0           | 0          | 0.035051   | 0.000981   | 0.014344   | 0.227   | 0.056386    | 1.070071 |
| 0           | 0.043144   | 0          | 0          | 0.018792   | 0.34    | 0.03307     | 1.075558 |
| 0           | 0.019691   | 0          | 0          | 0.00821    | 0.08    | 0.123297    | 1.047355 |
| 0           | 0.037016   | 0          | 0          | 0.0089     | 0.037   | 0.168959    | 1.032668 |
| 0           | 0.061288   | 0          | 0          | 0.028947   | 0.426   | 0.021829    | 1.070206 |
| 0           | 0.091833   | 0          | 0          | 0.018327   | 0.518   | 0.008466    | 1.074843 |
| 0           | 0.027417   | 0          | 0          | 0.005252   | 0.208   | 0.060487    | 1.060588 |
| 0           | 0.041838   | 0          | 0          | 0.010923   | 0.175   | 0.06971     | 1.072765 |
| 0           | 0          | 0.013893   | 0          | 0.007929   | 0.209   | 0.06038     | 1.070772 |
| 0           | 0.006359   | 0          | 0          | 0.006959   | 0.084   | 0.119909    | 1.041027 |
| 0           | 0          | 0.041504   | 0          | 0.021429   | 0.164   | 0.073547    | 1.06123  |
| 0           | 0.038277   | 0          | 0          | 0.005058   | 0.355   | 0.03136     | 1.073288 |
| 0           | 0          | 0.012254   | 0          | 0.007458   | 0.105   | 0.105249    | 1.059534 |
| 0           | 0.023465   | 0          | 0          | 0.031463   | 0.361   | 0.030325    | 1.07554  |
| 0           | 0          | 0.020862   | 0          | 0          | 0.453   | 0.016746    | 1.081771 |
| 0           | 0.162518   | 0          | 0          | 0.027205   | 0.46    | 0.01601     | 1.06805  |
| 0           | 0.074345   | 0          | 0          | 0.003809   | 0.178   | 0.069095    | 1.05746  |
| 0           | 0.060097   | 0          | 0          | 0.026984   | 0.187   | 0.066684    | 1.063587 |
| 0           | 0          | 0.020648   | 0          | 0.003992   | 0.055   | 0.143667    | 1.033647 |
| 0           | 0.054768   | 0          | 0          | 0.008448   | 0.447   | 0.018205    | 1.076472 |
| 0           | 0          | 0.03864    | 0          | 0.012405   | 0.22    | 0.058215    | 1.06899  |
| 0           | 0.114355   | 0          | 0          | 0.012562   | 0.453   | 0.017002    | 1.07573  |
| 0           | 0.008539   | 0          | 0          | 0.006757   | 0.092   | 0.115213    | 1.047503 |
| 0           | 0.149355   | 0          | 0          | 0          | 0.605   | 0.000533    | 1.092726 |
| 0           | 0.054278   | 0          | 0          | 0.013689   | 0.28    | 0.045114    | 1.063273 |
| 0           | 0.004316   | 0.006848   | 0          | 0.005062   | 0.245   | 0.05214     | 1.077446 |
| 0           | 0.002205   | 0.003624   | 0          | 0.01078    | 0.14    | 0.082258    | 1.055043 |
| 0           | 0.027103   | 0          | 0          | 0.013032   | 0.015   | 0.238605    | 0.990523 |
| 0           | 0.051683   | 0          | 0          | 0          | 0.223   | 0.057671    | 1.063635 |
| 0           | 0          | 0.010416   | 0          | 5.24E-05   | 0.39    | 0.026009    | 1.081703 |
| 0.007052    | 0.048319   | 0.040257   | 0          | 0.009269   | 0.251   | 0.050623    | 1.059645 |
| 0           | 0.03157    | 0          | 0          | 0.000847   | 0.162   | 0.074091    | 1.057978 |
| 0           | 0.028492   | 0          | 0          | 0.014815   | 0.075   | 0.127707    | 1.044684 |
| 0           | 0.0191     | 0          | 0.005426   | 0.033332   | 0.273   | 0.046484    | 1.068906 |
| 0           | 0.032076   | 0          | 0          | 0.000327   | 0.164   | 0.073401    | 1.067714 |
| 0           | 0.030978   | 0          | 0          | 0          | 0.011   | 0.29665     | 0.966446 |
| 0           | 0.026985   | 0          | 0          | 0          | 0.596   | 0.001515    | 1.084253 |
| 0.00328     | 0.108243   | 0          | 0          | 0.003254   | 0.011   | 0.299151    | 0.991458 |
| 0           | 0.033293   | 0          | 0          | 0.018393   | 0.102   | 0.107162    | 1.040701 |
| 0           | 0.068361   | 0          | 0          | 0.003299   | 0.073   | 0.129166    | 1.056315 |
| 0           | 0          | 0          | 0          | 0          | 0.002   | 0.513015    | 0.857642 |
| 0           | 0.106377   | 0          | 0          | 0          | 0.237   | 0.054064    | 1.08223  |
| 0           | 0.025703   | 0          | 0          | 0          | 0.013   | 0.259443    | 0.983371 |
| 0           | 0.047146   | 0          | 0          | 0.013913   | 0.764   | -0.01475    | 1.094664 |
| 0           | 0.069778   | 0          | 0          | 0          | 0.011   | 0.29384     | 0.973331 |
| 0           | 0.135309   | 0          | 0.03738    | 0.008948   | 0.737   | -0.01199    | 1.083612 |

Supplementary table 3

|          |   |          |          |          |          |       |           |          |
|----------|---|----------|----------|----------|----------|-------|-----------|----------|
|          | 0 | 0.207573 | 0        | 0        | 0.002882 | 0.188 | 0.065965  | 1.062132 |
|          | 0 | 0.123704 | 0        | 0        | 0        | 0.521 | 0.008215  | 1.08411  |
|          | 0 | 0.075096 | 0        | 0.005432 | 0        | 0.027 | 0.18373   | 1.021522 |
|          | 0 | 0.026661 | 0        | 0        | 0        | 0.338 | 0.03312   | 1.082286 |
|          | 0 | 0.031299 | 0        | 0        | 0.00389  | 0.133 | 0.086792  | 1.056064 |
|          | 0 | 0.033951 | 0        | 0        | 0.003354 | 0.017 | 0.218038  | 1.005729 |
|          | 0 | 0.120713 | 0        | 0        | 0.032744 | 0.118 | 0.097042  | 1.049976 |
|          | 0 | 0.076371 | 0        | 0        | 0        | 0.446 | 0.018599  | 1.077176 |
|          | 0 | 0.027127 | 0        | 0        | 0        | 0.021 | 0.199075  | 1.015318 |
| 0.021233 |   | 0.02406  | 0        | 0        | 0.02386  | 0.798 | -0.01886  | 1.113038 |
|          | 0 | 0.140694 | 0        | 0.000546 | 0.02166  | 0.107 | 0.103581  | 1.041046 |
|          | 0 | 0.022147 | 0        | 0        | 0        | 0.04  | 0.165553  | 1.036277 |
|          | 0 | 0.055188 | 0        | 0        | 0.001846 | 0.093 | 0.11496   | 1.033639 |
|          | 0 | 0.03749  | 0        | 0        | 0.012277 | 0.03  | 0.180183  | 1.039252 |
|          | 0 | 0.019582 | 0        | 0        | 0.002948 | 0.694 | -0.00866  | 1.098646 |
|          | 0 | 0.03919  | 0        | 0        | 0.031698 | 0.02  | 0.205028  | 1.004209 |
|          | 0 | 0.052868 | 0        | 0        | 0.005196 | 0.088 | 0.117114  | 1.05481  |
|          | 0 | 0.09802  | 0        | 0.005531 | 0        | 0.272 | 0.046813  | 1.082308 |
|          | 0 | 0.098934 | 0        | 0.004038 | 0.003198 | 0.196 | 0.063036  | 1.069938 |
|          | 0 | 0.071265 | 0        | 0        | 0        | 0.75  | -0.01302  | 1.109821 |
|          | 0 | 0.031622 | 0        | 0        | 0        | 0.506 | 0.009826  | 1.081017 |
|          | 0 | 0.028223 | 0        | 0        | 0        | 0.279 | 0.045316  | 1.090368 |
|          | 0 | 0.040009 | 0        | 0        | 0.049579 | 0.298 | 0.041037  | 1.080762 |
|          | 0 | 0.077243 | 0        | 0.000363 | 0        | 0.04  | 0.16556   | 1.027928 |
|          | 0 | 0.051698 | 0        | 0        | 0.002978 | 0.25  | 0.051349  | 1.065965 |
|          | 0 | 0.128999 | 0        | 0        | 0        | 0.907 | -0.03128  | 1.102451 |
|          | 0 | 0.103252 | 0        | 0        | 0.091283 | 0.107 | 0.103192  | 1.044047 |
|          | 0 | 0        | 0        | 0        | 0        | 0.118 | 0.097601  | 1.062815 |
|          | 0 | 0.020815 | 0        | 0        | 0.002136 | 0.326 | 0.035408  | 1.075756 |
|          | 0 | 0.038596 | 0        | 0        | 0.000819 | 0.043 | 0.161019  | 1.03464  |
|          | 0 | 0.065207 | 0        | 0.004915 | 0.004043 | 0.21  | 0.06024   | 1.056377 |
|          | 0 | 0.06062  | 0        | 0        | 0.00232  | 0.023 | 0.191091  | 1.008923 |
|          | 0 | 0.040641 | 0        | 0        | 0        | 0.737 | -0.01193  | 1.092495 |
|          | 0 | 0.185125 | 0        | 0        | 0        | 0.434 | 0.020608  | 1.087275 |
|          | 0 | 0.029621 | 0        | 0        | 0.000468 | 0.453 | 0.01683   | 1.089671 |
|          | 0 | 0.038619 | 0        | 0        | 0        | 0.284 | 0.044083  | 1.070715 |
|          | 0 | 0.089344 | 0        | 0        | 0.000525 | 0.081 | 0.122714  | 1.0316   |
|          | 0 | 0.040793 | 0        | 0        | 0        | 0.026 | 0.187754  | 1.069349 |
|          | 0 | 0.122727 | 0        | 0        | 0        | 0.552 | 0.006191  | 1.090847 |
|          | 0 | 0.067118 | 0        | 0        | 0.000364 | 0.439 | 0.019523  | 1.082453 |
|          | 0 | 0.18904  | 0        | 0        | 0        | 0.647 | -0.00372  | 1.089241 |
| 0.006424 |   | 0.082599 | 0        | 0        | 0        | 0.608 | -6.42E-05 | 1.08862  |
|          | 0 | 0.018723 | 0        | 0        | 0        | 0.058 | 0.139933  | 1.041383 |
|          | 0 | 0.050066 | 0        | 0        | 0        | 0.852 | -0.0245   | 1.099249 |
|          | 0 | 0.046673 | 0        | 0        | 0.00826  | 0.3   | 0.04025   | 1.116116 |
|          | 0 | 0.039609 | 0        | 0        | 0        | 0.048 | 0.151706  | 1.023874 |
|          | 0 | 0.148623 | 0        | 0        | 0.022139 | 0.505 | 0.010053  | 1.086147 |
|          | 0 | 0.044067 | 0        | 0        | 0        | 0.129 | 0.089777  | 1.070916 |
| 0.007133 |   | 0.053614 | 0        | 0        | 0.012156 | 0.08  | 0.123255  | 1.040449 |
|          | 0 | 0.034044 | 0        | 0        | 0        | 0.041 | 0.161742  | 1.020503 |
|          | 0 | 0.06227  | 0        | 0        | 0.003215 | 0.084 | 0.120395  | 1.039866 |
|          | 0 | 0.106317 | 0        | 0        | 0.008848 | 0.38  | 0.027154  | 1.072025 |
|          | 0 | 0.079314 | 0        | 0        | 0        | 0.169 | 0.072054  | 1.057171 |
|          | 0 | 0.097573 | 0        | 0        | 0        | 0.12  | 0.095393  | 1.049048 |
|          | 0 | 0        | 0.042569 | 0        | 0.004535 | 0.145 | 0.080647  | 1.057073 |
|          | 0 | 0.199139 | 0        | 0        | 0.009963 | 0.87  | -0.02722  | 1.100561 |
|          | 0 | 0.089764 | 0        | 0        | 0        | 0.577 | 0.00351   | 1.074989 |
|          | 0 | 0.032419 | 0        | 0        | 0.022184 | 0.354 | 0.031633  | 1.083049 |

Supplementary table 3



|          |   |          |          |          |          |       |          |          |
|----------|---|----------|----------|----------|----------|-------|----------|----------|
|          | 0 | 0.012657 | 0        | 0        | 0        | 0.02  | 0.20955  | 1.011355 |
|          | 0 | 0.052426 | 0        | 0        | 0        | 0.427 | 0.02154  | 1.087817 |
| 0.015189 | 0 | 0.049855 | 0        | 0        | 0        | 0.239 | 0.053607 | 1.068497 |
|          | 0 | 0.03229  | 0        | 0        | 0.003745 | 0.26  | 0.049425 | 1.080462 |
|          | 0 | 0.17102  | 0        | 0        | 0        | 0.651 | -0.00394 | 1.088365 |
|          | 0 | 0.103722 | 0        | 0        | 0.002943 | 0.177 | 0.069441 | 1.07938  |
|          | 0 | 0.131034 | 0        | 0        | 0.002769 | 0.786 | -0.01742 | 1.090705 |
|          | 0 | 0.064151 | 0        | 0        | 0        | 0.106 | 0.1043   | 1.039358 |
|          | 0 | 0.144662 | 0        | 0        | 0.000511 | 0.482 | 0.013275 | 1.086638 |
|          | 0 | 0.098652 | 0        | 0        | 0        | 0.226 | 0.056828 | 1.063539 |
|          | 0 | 0.033289 | 0        | 0        | 0        | 0.516 | 0.008695 | 1.091744 |
|          | 0 | 0.036707 | 0        | 0        | 0.001925 | 0.373 | 0.028352 | 1.087013 |
|          | 0 | 0.073467 | 0.004167 | 0        | 0        | 0.011 | 0.297968 | 0.964729 |
|          | 0 | 0.084035 | 0        | 0        | 0        | 0.497 | 0.010971 | 1.095001 |
|          | 0 | 0.048834 | 0        | 0        | 0        | 0.258 | 0.049663 | 1.07443  |
|          | 0 | 0.057393 | 0        | 0        | 0        | 0.011 | 0.29304  | 1.005155 |
|          | 0 | 0.117243 | 0        | 0        | 0.007905 | 0.25  | 0.051116 | 1.067298 |
|          | 0 | 0.06836  | 0        | 0        | 0.002754 | 0.194 | 0.063974 | 1.057259 |
|          | 0 | 0.03965  | 0        | 0        | 0.002978 | 0.569 | 0.004546 | 1.08596  |
|          | 0 | 0.107807 | 0        | 0        | 0        | 0.32  | 0.036498 | 1.081215 |
|          | 0 | 0.052513 | 0        | 0        | 0        | 0.698 | -0.00892 | 1.100319 |
|          | 0 | 0.049364 | 0        | 0        | 0        | 0.866 | -0.02614 | 1.118391 |
|          | 0 | 0.012229 | 0        | 0        | 0        | 0.094 | 0.113651 | 1.05111  |
|          | 0 | 0.022752 | 0        | 0        | 0.001209 | 0.022 | 0.197001 | 1.030203 |
|          | 0 | 0.101755 | 0        | 0.009728 | 0        | 0.356 | 0.031227 | 1.07169  |
|          | 0 | 0.15705  | 0        | 0        | 0.003595 | 0.228 | 0.056197 | 1.068036 |
|          | 0 | 0.069468 | 0        | 0        | 0.016739 | 0.504 | 0.01039  | 1.077049 |
|          | 0 | 0.021305 | 0        | 0        | 0        | 0.117 | 0.098358 | 1.066858 |
|          | 0 | 0.257693 | 0        | 0        | 0.015502 | 0.436 | 0.020008 | 1.086689 |
|          | 0 | 0.05404  | 0        | 0        | 0        | 0.564 | 0.005285 | 1.087883 |
|          | 0 | 0.025964 | 0        | 0        | 0.001343 | 0.084 | 0.119725 | 1.046927 |
|          | 0 | 0.049968 | 0        | 0        | 0        | 0.13  | 0.08959  | 1.063153 |
|          | 0 | 0.205535 | 0        | 0.012823 | 0        | 0.491 | 0.011937 | 1.079501 |
|          | 0 | 0.004465 | 0        | 0        | 0        | 0.116 | 0.098825 | 1.087542 |
|          | 0 | 0.054861 | 0        | 0        | 0        | 0.335 | 0.033377 | 1.078533 |
| 0.01394  | 0 | 0.141137 | 0        | 0.004027 | 0.008733 | 0.12  | 0.095365 | 1.058007 |
|          | 0 | 0.003894 | 0        | 0.002076 | 0.00018  | 0.014 | 0.254088 | 0.99632  |
|          | 0 | 0.022909 | 0        | 0        | 0.009753 | 0.077 | 0.124838 | 1.044517 |
|          | 0 | 0        | 0        | 0        | 0        | 0.759 | -0.01391 | 1.118314 |
|          | 0 | 0.053183 | 0        | 0        | 0        | 0.564 | 0.005294 | 1.096933 |
|          | 0 | 0.014935 | 0        | 0        | 0        | 0.241 | 0.053379 | 1.115417 |
|          | 0 | 0.06226  | 0        | 0        | 0.000565 | 0.223 | 0.057339 | 1.065858 |
|          | 0 | 0        | 0.015754 | 0        | 0.071409 | 0.166 | 0.072946 | 1.073291 |
|          | 0 | 0.160724 | 0        | 0        | 0.03321  | 0.253 | 0.050399 | 1.061242 |
|          | 0 | 0.179708 | 0        | 0        | 0.002186 | 0.458 | 0.016291 | 1.07577  |
| 0.202582 | 0 | 0.067398 | 0        | 0        | 0.016912 | 0.757 | -0.0136  | 1.087933 |
|          | 0 | 0.061611 | 0        | 0        | 0        | 0.377 | 0.027736 | 1.074449 |
|          | 0 | 0.21968  | 0        | 0        | 0        | 0.166 | 0.072824 | 1.056956 |
|          | 0 | 0.064316 | 0        | 0        | 0.029304 | 0.833 | -0.02235 | 1.084922 |
|          | 0 | 0.048555 | 0        | 0        | 0.011196 | 0.016 | 0.234108 | 0.991397 |
|          | 0 | 0.236869 | 0        | 0.008593 | 0.004621 | 0.096 | 0.112356 | 1.051298 |
|          | 0 | 0.27545  | 0        | 0.001397 | 0.001621 | 0.378 | 0.027622 | 1.090108 |
|          | 0 | 0.073814 | 0        | 0        | 0.000589 | 0.261 | 0.04895  | 1.061311 |
|          | 0 | 0.168217 | 0        | 0        | 0        | 0.107 | 0.103384 | 1.052683 |
|          | 0 | 0.118208 | 0        | 0        | 0        | 0.042 | 0.161243 | 1.042188 |
|          | 0 | 0.016893 | 0        | 0        | 0        | 0.017 | 0.215315 | 1.024175 |
|          | 0 | 0.070536 | 0        | 0        | 0        | 0.874 | -0.02795 | 1.095402 |
|          | 0 | 0.092991 | 0        | 0.00091  | 0.009927 | 0.174 | 0.070215 | 1.066614 |

Supplementary table 3

|          |          |          |          |          |       |          |          |
|----------|----------|----------|----------|----------|-------|----------|----------|
| 0.040457 | 0.050379 | 0        | 0        | 0.004357 | 0.035 | 0.170638 | 1.03243  |
| 0        | 0.079352 | 0        | 0        | 0.003698 | 0.239 | 0.053628 | 1.073648 |
| 0        | 0.088836 | 0.01517  | 0        | 0.005345 | 0.569 | 0.004442 | 1.080777 |
| 0        | 0.029412 | 0        | 0        | 2.79E-05 | 0.11  | 0.101032 | 1.053526 |
| 0        | 0.162781 | 0        | 0        | 0.00685  | 0.865 | -0.02572 | 1.085047 |
| 0        | 0.144466 | 0        | 0        | 0.005993 | 0.435 | 0.020241 | 1.068636 |
| 0        | 0.036965 | 0        | 0        | 0.012784 | 0.023 | 0.192222 | 1.008655 |
| 0        | 0.04709  | 0        | 0        | 0        | 0.363 | 0.030024 | 1.080546 |
| 0        | 0        | 0.06825  | 0        | 0.027319 | 0.011 | 0.29613  | 0.966344 |
| 0        | 0.052956 | 0        | 0        | 0        | 0.086 | 0.117986 | 1.045295 |
| 0        | 0.051362 | 0        | 0        | 0        | 0.014 | 0.248004 | 0.985345 |
| 0        | 0.014378 | 0        | 0        | 0.008178 | 0.021 | 0.203535 | 1.007467 |
| 0        | 0.123701 | 0        | 0        | 0        | 0.137 | 0.084621 | 1.0661   |
| 0        | 0.031306 | 0        | 0        | 0.071472 | 0.369 | 0.02918  | 1.085129 |
| 0        | 0        | 0        | 0        | 0.010582 | 0.02  | 0.204626 | 1.012943 |
| 0        | 0.042283 | 0        | 0        | 0.010437 | 0.107 | 0.103081 | 1.047017 |
| 0        | 0.018022 | 0        | 0        | 0.001195 | 0.402 | 0.02504  | 1.105688 |
| 0        | 0.013858 | 0        | 0        | 0        | 0.218 | 0.058473 | 1.073996 |
| 0        | 0.042349 | 0        | 0        | 0        | 0.598 | 0.00124  | 1.095089 |
| 0.00434  | 0.165852 | 0        | 0        | 0        | 0.772 | -0.01564 | 1.083866 |
| 0        | 0.066667 | 0        | 0        | 0        | 0.784 | -0.01722 | 1.134953 |
| 0        | 0.061606 | 0        | 0        | 0.040473 | 0.51  | 0.009594 | 1.093863 |
| 0        | 0.217027 | 0        | 0        | 0        | 0.466 | 0.015076 | 1.07346  |
| 0        | 0.160846 | 0        | 0.002781 | 0        | 0.638 | -0.00308 | 1.091662 |
| 0        | 0.003273 | 0.000502 | 0        | 0.0231   | 0.151 | 0.079075 | 1.068285 |
| 0        | 0.043655 | 0        | 0        | 0.006671 | 0.45  | 0.017649 | 1.091812 |
| 0        | 0.169999 | 0        | 0        | 0.006626 | 0.988 | -0.04694 | 1.110918 |
| 0        | 0.061404 | 0        | 0        | 0        | 0.17  | 0.071664 | 1.061817 |
| 0        | 0.02183  | 0        | 0        | 0        | 0.118 | 0.097119 | 1.075993 |
| 0        | 0.032059 | 0        | 0        | 0.003063 | 0.372 | 0.028624 | 1.096064 |
| 0        | 0.060591 | 0        | 0        | 0        | 0.025 | 0.188216 | 1.009766 |
| 0        | 0.048433 | 0        | 0        | 0.005129 | 0.155 | 0.077464 | 1.05448  |
| 0        | 0.020552 | 0        | 0        | 0        | 0.168 | 0.072303 | 1.075639 |
| 0        | 0.053666 | 0        | 0        | 0        | 0.068 | 0.132764 | 1.038286 |
| 0        | 0.028308 | 0        | 0        | 0.002129 | 0.208 | 0.060573 | 1.072965 |
| 0        | 0.090979 | 0        | 0        | 0.008016 | 0.739 | -0.01219 | 1.106593 |
| 0        | 0.037782 | 0        | 0        | 0        | 0.677 | -0.00712 | 1.10095  |
| 0        | 0.123849 | 0        | 0        | 0.002706 | 0.49  | 0.012127 | 1.085335 |
| 0        | 0.028991 | 0        | 0        | 0        | 0.214 | 0.059032 | 1.076877 |
| 0        | 0.073694 | 0        | 0        | 0        | 0.807 | -0.01975 | 1.101541 |
| 0        | 0.05044  | 0        | 0        | 0        | 0.483 | 0.013165 | 1.084649 |
| 0        | 0.028689 | 0        | 0        | 0.005078 | 0.009 | 0.318643 | 0.969242 |
| 0        | 0.147139 | 0        | 0        | 0.005887 | 0.409 | 0.024265 | 1.077633 |
| 0        | 0.079524 | 0        | 0        | 0        | 0.28  | 0.045054 | 1.073714 |
| 0        | 0        | 0        | 0        | 0        | 0.762 | -0.01443 | 1.104286 |
| 0        | 0        | 0.064883 | 0.000284 | 0        | 0.208 | 0.060512 | 1.087623 |
| 0        | 0.057827 | 0        | 0        | 0        | 0.75  | -0.01306 | 1.09081  |
| 0        | 0.028851 | 0        | 0        | 0        | 0.297 | 0.041802 | 1.093491 |
| 0        | 0.071904 | 0        | 0        | 0        | 0.708 | -0.00993 | 1.111573 |
| 0        | 0.057444 | 0        | 0        | 0.011463 | 0.374 | 0.028218 | 1.09146  |
| 0.00081  | 0.023514 | 0        | 0        | 0        | 0.641 | -0.00332 | 1.119319 |
| 0        | 0.049705 | 0        | 0        | 0        | 0.192 | 0.06496  | 1.076826 |
| 0        | 0        | 0.008891 | 6.20E-05 | 0        | 0.357 | 0.031009 | 1.104322 |
| 0        | 0.054114 | 0        | 0        | 0        | 0.32  | 0.036404 | 1.10394  |
| 0        | 0.040229 | 0        | 0        | 0.004487 | 0.04  | 0.166436 | 1.038864 |
| 0        | 0.041475 | 0        | 0        | 0        | 0.373 | 0.028434 | 1.084207 |
| 0        | 0.040735 | 0        | 0        | 0        | 0.247 | 0.051823 | 1.073578 |
| 0        | 0.075976 | 0        | 0        | 0        | 0.069 | 0.131518 | 1.031681 |

Supplementary table 3

|          |          |          |          |          |       |          |          |
|----------|----------|----------|----------|----------|-------|----------|----------|
| 0        | 0.198996 | 0        | 0        | 0.012894 | 0.207 | 0.060914 | 1.06062  |
| 0        | 0.139558 | 0        | 0        | 0.016053 | 0.939 | -0.03545 | 1.092115 |
| 0        | 0.228987 | 0        | 0        | 0        | 0.453 | 0.016942 | 1.076642 |
| 0        | 0.043585 | 0        | 0        | 0.037952 | 0.161 | 0.074571 | 1.058977 |
| 0        | 0.024356 | 0        | 0        | 0.007982 | 0.12  | 0.095317 | 1.05865  |
| 0        | 0.110808 | 0.037758 | 0        | 0.005872 | 0.251 | 0.050801 | 1.063497 |
| 0        | 0.124069 | 0        | 0        | 0        | 0.569 | 0.00443  | 1.08906  |
| 0        | 0.035799 | 0        | 0        | 0.007163 | 0.492 | 0.011807 | 1.086618 |
| 0        | 0.240972 | 0        | 0        | 0.001345 | 0.623 | -0.00154 | 1.088171 |
| 0        | 0.025914 | 0        | 0        | 0        | 0.719 | -0.01088 | 1.100199 |
| 0        | 0.051798 | 0        | 0        | 0.031955 | 0.488 | 0.012604 | 1.081045 |
| 0        | 0.056143 | 0        | 0        | 0.010457 | 0.488 | 0.012575 | 1.078678 |
| 0        | 0.121737 | 0        | 0        | 0.00832  | 0.44  | 0.019443 | 1.068764 |
| 0        | 0.138118 | 0        | 0        | 0        | 0.614 | -0.00061 | 1.077973 |
| 0        | 0.102514 | 0        | 0.025091 | 0.007855 | 0.373 | 0.02849  | 1.069109 |
| 0        | 0.071834 | 0        | 0        | 0.006546 | 0.131 | 0.088026 | 1.042968 |
| 0        | 0.049006 | 0        | 0        | 0.003385 | 0.002 | 0.507665 | 0.861184 |
| 0        | 0.159556 | 0        | 0        | 0.068172 | 0.623 | -0.00147 | 1.077057 |
| 0        | 0.052628 | 0        | 0        | 0        | 0.578 | 0.003275 | 1.091858 |
| 0        | 0.022653 | 0        | 0.000168 | 0.001821 | 0.602 | 0.000912 | 1.085675 |
| 0        | 0.076274 | 0        | 0        | 0        | 0.771 | -0.0156  | 1.087702 |
| 0        | 0.080107 | 0        | 0        | 0.024034 | 0.346 | 0.032599 | 1.08961  |
| 0        | 0.078802 | 0        | 0        | 0        | 0.659 | -0.00451 | 1.096797 |
| 0        | 0.035896 | 0        | 0        | 0.001651 | 0.053 | 0.147105 | 1.061697 |
| 0        | 0.06473  | 0        | 0        | 0.008892 | 0.16  | 0.075751 | 1.060466 |
| 0        | 0.040467 | 0        | 0        | 0        | 0.45  | 0.017634 | 1.105663 |
| 0        | 0.124868 | 0        | 0        | 0        | 0.405 | 0.024823 | 1.083926 |
| 0        | 0.044507 | 0        | 0        | 0.028966 | 0.117 | 0.098437 | 1.04958  |
| 0        | 0.037485 | 0        | 0        | 0        | 0.025 | 0.188449 | 1.067493 |
| 0        | 0.076629 | 0        | 0        | 0        | 0.537 | 0.007104 | 1.080361 |
| 0.006791 | 0.041426 | 0        | 0        | 6.47E-05 | 0.447 | 0.018329 | 1.104808 |
| 0        | 0.062035 | 0        | 0        | 0.006272 | 0.013 | 0.268712 | 0.97378  |
| 0        | 0.049522 | 0        | 0        | 0.026295 | 0.013 | 0.268838 | 0.97508  |
| 0        | 0.045968 | 0        | 0        | 0        | 0.567 | 0.004939 | 1.091906 |
| 0        | 0.048683 | 0        | 0        | 0.004227 | 0.011 | 0.291103 | 0.978954 |
| 0        | 0.097772 | 0        | 0        | 0.001712 | 0.107 | 0.102558 | 1.061391 |
| 0        | 0.028371 | 0        | 0        | 0.004069 | 0.027 | 0.184674 | 1.02465  |
| 0        | 0.133422 | 0        | 0        | 0.012901 | 0.187 | 0.066884 | 1.061056 |
| 0        | 0.082794 | 0        | 0        | 0.001638 | 0.691 | -0.00828 | 1.094361 |
| 0        | 0.02696  | 0        | 0        | 0        | 0.136 | 0.085452 | 1.053135 |
| 0        | 0.054903 | 0        | 0        | 0        | 0.042 | 0.161405 | 1.028307 |
| 0        | 0.112243 | 0        | 0        | 0        | 0.376 | 0.027958 | 1.075704 |
| 0        | 0.153291 | 0        | 0        | 0.00259  | 0.591 | 0.001941 | 1.091849 |
| 0.065988 | 0        | 0.028004 | 0        | 0        | 0.315 | 0.037695 | 1.094874 |
| 0        | 0.105044 | 0        | 0        | 0        | 0.692 | -0.00833 | 1.089714 |
| 0        | 0.074729 | 0        | 0        | 0        | 0.502 | 0.010582 | 1.078604 |
| 0        | 0.010057 | 0        | 0        | 0        | 0.578 | 0.00335  | 1.085392 |
| 0        | 0.060571 | 0        | 0        | 0        | 0.317 | 0.037355 | 1.080566 |
| 0.00779  | 0.008197 | 0        | 0        | 0.012603 | 0.163 | 0.073623 | 1.073761 |
| 0        | 0.151777 | 0        | 0        | 0.014503 | 0.532 | 0.007785 | 1.076992 |
| 0        | 0.077308 | 0        | 0        | 0        | 0.647 | -0.00364 | 1.098228 |
| 0        | 0.038463 | 0        | 0        | 0.003403 | 0.698 | -0.0089  | 1.09502  |
| 0        | 0.061274 | 0        | 0.000675 | 0        | 0.026 | 0.187552 | 1.038262 |
| 0        | 0.124943 | 0        | 0        | 0        | 0.448 | 0.017893 | 1.079271 |
| 0        | 0        | 0.012128 | 0        | 0.023376 | 0.327 | 0.035049 | 1.077782 |
| 0        | 0.13935  | 0        | 0        | 0.001579 | 0.096 | 0.112262 | 1.053763 |
| 0        | 0.059343 | 0        | 0        | 0        | 0.012 | 0.283103 | 0.979651 |
| 0        | 0.048872 | 0        | 0        | 0        | 0.044 | 0.157729 | 1.025983 |

Supplementary table 3

|          |          |          |          |          |          |       |          |          |
|----------|----------|----------|----------|----------|----------|-------|----------|----------|
|          | 0        | 0.022403 | 0        | 0        | 0.015833 | 0.083 | 0.121452 | 1.042784 |
|          | 0        | 0.194423 | 0        | 0        | 0        | 0.565 | 0.005226 | 1.073954 |
|          | 0        | 0.052428 | 0        | 0        | 0.00041  | 0.263 | 0.048675 | 1.059292 |
|          | 0        | 0.048684 | 0        | 0        | 0        | 0.921 | -0.0331  | 1.111943 |
|          | 0        | 0        | 0        | 0        | 0        | 0.65  | -0.00385 | 1.100542 |
|          | 0        | 0.016368 | 0        | 0        | 0.001901 | 0.457 | 0.016514 | 1.105559 |
|          | 0        | 0.041137 | 0        | 0        | 0        | 0.413 | 0.023054 | 1.081908 |
|          | 0        | 0.040363 | 0        | 0        | 0.005677 | 0.29  | 0.043478 | 1.078337 |
| 0.015649 | 0.381607 | 0        | 0        | 0        | 0        | 0.618 | -0.00102 | 1.101744 |
|          | 0        | 0.064618 | 0        | 0        | 0.018258 | 0.095 | 0.11262  | 1.044573 |
|          | 0        | 0.021224 | 0        | 0        | 0.068714 | 0.108 | 0.102093 | 1.048567 |
|          | 0        | 0        | 0.099186 | 0        | 0.016002 | 0.581 | 0.003049 | 1.094174 |
|          | 0        | 0.021779 | 0        | 0        | 0        | 0.355 | 0.031436 | 1.08714  |
|          | 0        | 0.012682 | 0        | 0        | 0.002501 | 0.031 | 0.175307 | 1.040629 |
|          | 0        | 0.012857 | 0        | 0        | 0.020012 | 0.137 | 0.084417 | 1.064353 |
|          | 0        | 0.056629 | 0        | 0        | 0        | 0.786 | -0.01746 | 1.092632 |
|          | 0        | 0.082847 | 0        | 0        | 0.000941 | 0.569 | 0.004532 | 1.088612 |
|          | 0        | 0.012765 | 0        | 0        | 0        | 0.006 | 0.332025 | 0.957171 |
|          | 0        | 0.200279 | 0        | 0        | 0.001989 | 0.355 | 0.031355 | 1.071663 |
|          | 0        | 0.110608 | 0        | 0.000416 | 0.010851 | 0.225 | 0.057042 | 1.058957 |
|          | 0        | 0.058141 | 0        | 0        | 0.005578 | 0.375 | 0.028129 | 1.075141 |
|          | 0        | 0.031145 | 0        | 0        | 0        | 0.352 | 0.03197  | 1.078607 |
|          | 0        | 0.028096 | 0        | 0        | 0.031235 | 0.106 | 0.103916 | 1.067029 |
|          | 0        | 0.033144 | 0        | 0        | 0        | 0.013 | 0.273164 | 0.982986 |
|          | 0        | 0.108965 | 0        | 0        | 0.000354 | 0.127 | 0.092233 | 1.070116 |
|          | 0        | 0.098455 | 0        | 0        | 0.01942  | 0.794 | -0.01854 | 1.091472 |
|          | 0        | 0.066899 | 0        | 0        | 0.001449 | 0.223 | 0.057442 | 1.067911 |
|          | 0        | 0        | 0        | 0        | 0.004125 | 0.016 | 0.224136 | 1.062199 |
|          | 0        | 0.057922 | 0        | 0        | 0        | 0.12  | 0.095862 | 1.065941 |
|          | 0        | 0.068591 | 0        | 0        | 0.001776 | 0.02  | 0.20807  | 1.017992 |
|          | 0        | 0.086405 | 0        | 0        | 0        | 0.173 | 0.07111  | 1.062211 |
|          | 0        | 0.073022 | 0        | 0        | 0        | 0.505 | 0.010358 | 1.09884  |
|          | 0        | 0.035671 | 0        | 0        | 0        | 0.102 | 0.106949 | 1.051275 |
|          | 0        | 0.024098 | 0        | 0        | 0        | 0.187 | 0.066896 | 1.091123 |
|          | 0        | 0.111739 | 0        | 0        | 0.002085 | 0.101 | 0.107975 | 1.04327  |
|          | 0        | 0.069799 | 0        | 0        | 0.005559 | 0.232 | 0.055067 | 1.068421 |
|          | 0        | 0.065588 | 0        | 0        | 0.007167 | 0.083 | 0.121061 | 1.096672 |
|          | 0        | 0.157628 | 0        | 0        | 0        | 0.955 | -0.03814 | 1.094722 |
|          | 0        | 0.052858 | 0        | 0        | 0.002798 | 0.276 | 0.045791 | 1.063204 |
|          | 0        | 0.230603 | 0        | 0        | 0.001037 | 0.353 | 0.031809 | 1.078064 |
|          | 0        | 0.176407 | 0        | 0.007221 | 0        | 0.222 | 0.058051 | 1.06496  |
|          | 0        | 0.000724 | 0        | 0        | 0.002951 | 0.025 | 0.188486 | 1.026898 |
|          | 0        | 0.010791 | 0        | 0        | 0        | 0.257 | 0.049829 | 1.075439 |
| 0.006395 | 0.190452 | 0        | 0.000842 | 0        | 0        | 0.885 | -0.02888 | 1.094069 |
|          | 0        | 0.063452 | 0        | 0        | 0.00652  | 0.28  | 0.045029 | 1.067212 |
|          | 0        | 0.03454  | 0        | 0        | 0        | 0.623 | -0.00162 | 1.083563 |
|          | 0        | 0.032032 | 0        | 0        | 0        | 0.155 | 0.077592 | 1.070509 |
|          | 0        | 0.330924 | 0        | 0.012198 | 0        | 0.791 | -0.01802 | 1.105297 |
|          | 0        | 0.017182 | 0        | 0        | 0.011644 | 0.081 | 0.122954 | 1.051951 |
|          | 0        | 0.046714 | 0        | 0        | 0.000358 | 0.053 | 0.146579 | 1.046213 |
|          | 0        | 0.036101 | 0        | 0        | 0.26329  | 0.068 | 0.132506 | 1.068878 |
|          | 0        | 0        | 0.028581 | 0        | 0.017012 | 0.512 | 0.009483 | 1.084995 |
|          | 0        | 0.03653  | 0        | 0        | 0.008623 | 0.017 | 0.215544 | 1.009752 |
|          | 0        | 0.12402  | 0        | 0        | 0.004445 | 0.805 | -0.01959 | 1.08916  |
| 0.009713 | 0.054624 | 0        | 0        | 0        | 0.002651 | 0.003 | 0.371043 | 0.934019 |
|          | 0        | 0.278586 | 0        | 0        | 0.003306 | 0.695 | -0.00872 | 1.087933 |
|          | 0        | 0.296194 | 0        | 0.002881 | 0        | 0.544 | 0.006716 | 1.09225  |
|          | 0        | 0.031064 | 0        | 0        | 0        | 0.405 | 0.024792 | 1.079948 |

Supplementary table 3

|          |          |          |          |          |       |          |          |
|----------|----------|----------|----------|----------|-------|----------|----------|
| 0        | 0.241148 | 0        | 0        | 0.015713 | 0.384 | 0.026858 | 1.079735 |
| 0        | 0.033975 | 0        | 0        | 0.006974 | 0.994 | -0.04847 | 1.101833 |
| 0        | 0.023161 | 0        | 0        | 0        | 0.093 | 0.114696 | 1.053258 |
| 0        | 0.078359 | 0        | 0        | 0.005151 | 0.935 | -0.03461 | 1.107182 |
| 0        | 0.065218 | 0        | 0        | 0        | 0.721 | -0.01113 | 1.089604 |
| 0        | 0.130911 | 0        | 0        | 0        | 0.093 | 0.114457 | 1.056524 |
| 0        | 0.024849 | 0        | 0        | 0        | 0.223 | 0.057503 | 1.060478 |
| 0        | 0.274999 | 0        | 0        | 0        | 0.795 | -0.01866 | 1.096978 |
| 0        | 0.310354 | 0        | 0        | 0        | 0.219 | 0.058311 | 1.086544 |
| 0        | 0.024288 | 0        | 0        | 0.008376 | 0.041 | 0.161951 | 1.035503 |
| 0        | 0.132639 | 0        | 0        | 0        | 0.148 | 0.07987  | 1.050587 |
| 0        | 0.015464 | 0        | 0        | 0        | 0.098 | 0.110951 | 1.056802 |
| 0        | 0.098908 | 0        | 0        | 0        | 0.369 | 0.02904  | 1.078602 |
| 0        | 0.150235 | 0        | 0        | 0.011871 | 0.297 | 0.041294 | 1.073625 |
| 0        | 0.041406 | 0        | 0        | 0        | 0.465 | 0.015197 | 1.078269 |
| 0        | 0.070267 | 0        | 0        | 0.012673 | 0.389 | 0.026022 | 1.102555 |
| 0        | 0.04179  | 0        | 0        | 0        | 0.051 | 0.148375 | 1.023065 |
| 0        | 0.020142 | 0        | 0        | 0.003605 | 0.313 | 0.037841 | 1.087606 |
| 0        | 0.067182 | 0        | 0        | 0        | 0.82  | -0.02118 | 1.101339 |
| 0        | 0.092474 | 0        | 0        | 0        | 0.758 | -0.01374 | 1.122432 |
| 0        | 0.033263 | 0        | 0        | 0        | 0.092 | 0.115482 | 1.050539 |
| 0        | 0.10248  | 0        | 0        | 2.92E-05 | 0.759 | -0.01382 | 1.100435 |
| 0        | 0.064419 | 0        | 0        | 0.003719 | 0.077 | 0.125173 | 1.055373 |
| 0        | 0.041131 | 0        | 0        | 0.031364 | 0.243 | 0.052376 | 1.076252 |
| 0        | 0.1951   | 0        | 0        | 0        | 0.602 | 0.00096  | 1.085133 |
| 0        | 0.047498 | 0        | 0        | 0        | 0.557 | 0.005681 | 1.100195 |
| 0        | 0.025588 | 0        | 0        | 0.0189   | 0.099 | 0.110467 | 1.064142 |
| 0        | 0.053127 | 0        | 0.006119 | 0        | 0.043 | 0.160049 | 1.042536 |
| 0        | 0        | 0        | 0        | 0        | 0.167 | 0.072467 | 1.063794 |
| 0        | 0.057444 | 0        | 0        | 0        | 0.614 | -0.00063 | 1.09026  |
| 0        | 0.00211  | 0        | 0        | 0        | 0.306 | 0.039516 | 1.084    |
| 0        | 0.024006 | 0        | 0        | 0.039686 | 0.771 | -0.0156  | 1.105264 |
| 0        | 0.054354 | 0        | 0        | 0.000789 | 0.489 | 0.012376 | 1.08487  |
| 0        | 0.028688 | 0        | 0        | 0.014838 | 0.082 | 0.122082 | 1.04321  |
| 0        | 0.038427 | 0        | 0.114883 | 0        | 0.079 | 0.123624 | 1.051401 |
| 0        | 0.08313  | 0        | 0        | 0        | 0.138 | 0.0836   | 1.061566 |
| 0        | 0.029722 | 0        | 0        | 0.002312 | 0.038 | 0.168566 | 1.020559 |
| 0        | 0.017846 | 0        | 0        | 0.016935 | 0     | 0.687069 | 0.735496 |
| 0        | 0.180659 | 0        | 0.005294 | 0.016678 | 0.261 | 0.048807 | 1.093357 |
| 0        | 0.050047 | 0        | 0.002618 | 0        | 0.206 | 0.061172 | 1.089186 |
| 0        | 0.072221 | 0        | 0        | 0        | 0.18  | 0.068553 | 1.061809 |
| 0        | 0.077364 | 0        | 0        | 0        | 0.457 | 0.016456 | 1.086576 |
| 0        | 0.092857 | 0        | 0        | 0.008012 | 0.514 | 0.008898 | 1.079536 |
| 0        | 0.103616 | 0        | 0        | 0.003634 | 0.137 | 0.084426 | 1.060316 |
| 0        | 0.010357 | 0        | 0        | 0        | 0.097 | 0.111485 | 1.049311 |
| 0        | 0.051108 | 0        | 0        | 0        | 0.28  | 0.045236 | 1.083676 |
| 0        | 0.11948  | 0        | 0        | 0        | 0.761 | -0.01438 | 1.110851 |
| 0        | 0.033195 | 0        | 0        | 0        | 0.693 | -0.00854 | 1.091768 |
| 0        | 0.086039 | 0        | 0        | 0.035712 | 0.788 | -0.01767 | 1.099817 |
| 0        | 0        | 0.02568  | 0.000537 | 0.001751 | 0.076 | 0.126213 | 1.063944 |
| 0        | 0        | 0.018786 | 0        | 0        | 0.603 | 0.000644 | 1.096751 |
| 0.000876 | 0.074225 | 0        | 0        | 0.012921 | 0.346 | 0.032559 | 1.068824 |
| 0        | 0.068089 | 0        | 0        | 0.011526 | 0.145 | 0.080551 | 1.057661 |
| 0        | 0.042955 | 0        | 0        | 0.003526 | 0.533 | 0.007741 | 1.112477 |
| 0        | 0.071853 | 0        | 0        | 0        | 0.409 | 0.024218 | 1.095528 |
| 0        | 0.146509 | 0        | 0        | 0        | 0.111 | 0.100608 | 1.05721  |
| 0        | 0.198339 | 0        | 0        | 0        | 0.107 | 0.103621 | 1.050655 |
| 0        | 0        | 0.004118 | 0        | 0        | 0.32  | 0.036714 | 1.096093 |

Supplementary table 3



|          |          |          |          |          |       |          |          |
|----------|----------|----------|----------|----------|-------|----------|----------|
| 0        | 0.103345 | 0        | 0        | 0        | 0.346 | 0.032594 | 1.071094 |
| 0        | 0.048854 | 0        | 0        | 0.005565 | 0.244 | 0.052286 | 1.075893 |
| 0        | 0        | 0.020022 | 0        | 0.003795 | 0.225 | 0.056995 | 1.096186 |
| 0        | 0.156962 | 0        | 0.004969 | 0.001749 | 0.973 | -0.04126 | 1.100134 |
| 0        | 0.025601 | 0        | 0        | 0        | 0.04  | 0.167459 | 1.028002 |
| 0        | 0.041974 | 0        | 0        | 0        | 0.063 | 0.135282 | 1.072362 |
| 0        | 0.145337 | 0        | 0.003913 | 0.029646 | 0.128 | 0.091507 | 1.055997 |
| 0        | 0.143758 | 0        | 0        | 0.009993 | 0.763 | -0.01455 | 1.096476 |
| 0        | 0.117744 | 0        | 0        | 0.012165 | 0.521 | 0.008203 | 1.088854 |
| 0        | 0.050254 | 0        | 0        | 0.000987 | 0.357 | 0.031101 | 1.086015 |
| 0.001554 | 0.037627 | 0        | 0        | 0        | 0.107 | 0.102819 | 1.066785 |
| 0        | 0.172031 | 0        | 0.005569 | 0.001909 | 0.582 | 0.002961 | 1.087504 |
| 0        | 0.148908 | 0        | 0        | 0.005114 | 0.613 | -0.0004  | 1.080966 |
| 0        | 0.02455  | 0        | 0        | 0        | 0.443 | 0.019269 | 1.100431 |
| 0        | 0.03103  | 0        | 0.016058 | 0        | 0.283 | 0.044531 | 1.067874 |
| 0        | 0.05667  | 0        | 0        | 0        | 0.228 | 0.056036 | 1.063661 |
| 0        | 0.064919 | 0        | 0        | 0.002624 | 0.195 | 0.063668 | 1.060934 |
| 0        | 0.091939 | 0        | 0        | 0.001005 | 0.336 | 0.033282 | 1.092313 |
| 0        | 0.034781 | 0        | 0        | 0        | 0.073 | 0.129268 | 1.062999 |

Supplementary table 3

**Supplementary Table 4: Supplementary Table 4 shows the correlation between the expression of the six core prognostic genes and drug sensitivity.**

| Gene    | Drug        | cor      | pvalue   |
|---------|-------------|----------|----------|
| BATF    | LEE-011     | 0.549817 | 5.36E-06 |
| CREB1   | Nelarabine  | 0.537829 | 9.35E-06 |
| BATF    | Raloxifene  | 0.514869 | 2.57E-05 |
| BATF    | Dexrazoxa   | 0.489822 | 7.12E-05 |
| CREB3L1 | Cabozanti   | 0.447147 | 0.000341 |
| BATF    | LDK-378     | 0.441188 | 0.000418 |
| BATF    | Fulvestran  | 0.405665 | 0.001302 |
| ATF4    | Fluphenaz   | 0.388824 | 0.002139 |
| CREB3   | Palbociclik | -0.38814 | 0.002181 |
| CREB3L1 | Lenvatinib  | 0.386813 | 0.002266 |
| ATF1    | Ifosfamide  | 0.378112 | 0.002895 |
| CREB3L1 | Zoledrona   | 0.372769 | 0.003354 |
| CREB3   | Cobimetin   | -0.36191 | 0.004491 |
| ATF4    | Megestrol   | 0.36095  | 0.004607 |
| CREB3   | LEE-011     | -0.35641 | 0.005188 |
| CREB3L1 | Midostaur   | 0.356171 | 0.005221 |
| ATF1    | Dexrazoxa   | 0.355694 | 0.005286 |
| BATF    | Erlotinib   | -0.35129 | 0.005921 |
| CREB3L1 | Dasatinib   | 0.349281 | 0.006232 |
| CREB3   | Oxaliplatin | -0.34867 | 0.006329 |
| CREB3L1 | Abirateron  | 0.348419 | 0.00637  |
| CREB3   | Selumetini  | -0.347   | 0.006602 |
| CREB3   | Rapamycir   | 0.344584 | 0.007016 |
| ATF1    | Palbociclik | 0.340399 | 0.007785 |
| BATF    | Palbociclik | 0.336081 | 0.008656 |
| BATF    | Cyclophos   | 0.334434 | 0.00901  |
| CREB3   | LDK-378     | -0.33441 | 0.009015 |
| CREB3L1 | JNJ-42756   | 0.333865 | 0.009135 |
| ATF1    | Nelarabine  | 0.330604 | 0.009881 |
| ATF4    | Nelarabine  | 0.32982  | 0.010068 |
| CREB3L1 | Dabrafenik  | -0.32875 | 0.010328 |
| ATF1    | Hydroxyur   | 0.327524 | 0.010634 |
| BATF    | Sonidegib   | -0.32543 | 0.011174 |
| CREB3L1 | Cobimetin   | -0.32318 | 0.01178  |
| CREB3   | Trametinik  | -0.32025 | 0.012612 |
| CREB3   | ARRY-162    | -0.31909 | 0.012954 |
| CREB3   | Everolimus  | 0.318673 | 0.01308  |
| CREB1   | LEE-011     | 0.316981 | 0.013599 |
| BATF    | Selumetini  | 0.313918 | 0.014584 |
| CREB3   | IPI-145     | 0.312157 | 0.015178 |
| CREB3   | Temsirolin  | 0.30497  | 0.01782  |
| BATF    | Ibrutinib   | -0.30211 | 0.018974 |
| CREB1   | Chlorambu   | 0.302056 | 0.018998 |
| CREB3   | Ibrutinib   | 0.299219 | 0.020208 |
| CREB3   | Nilotinib   | -0.29629 | 0.021526 |
| ATF1    | Parthenoli  | 0.289936 | 0.024634 |
| CREB3   | RAPAMYC     | 0.288295 | 0.025496 |
| CREB3L1 | Neratinib   | -0.28664 | 0.026392 |
| ATF1    | LEE-011     | 0.285914 | 0.026791 |
| CREB3   | Floxuridine | 0.285423 | 0.027065 |
| CREB3L1 | Panobinos   | -0.28522 | 0.027179 |
| ATF4    | Irofulven   | -0.2843  | 0.027703 |
| CREB1   | Midostaur   | 0.283386 | 0.028227 |
| CREB1   | Hydroxyur   | 0.283353 | 0.028246 |
| CREB3L1 | Axitinib    | 0.282168 | 0.028941 |
| BATF    | Vemurafer   | 0.281754 | 0.029188 |
| ATF4    | ETHINYL E   | 0.281076 | 0.029595 |

**Supplementary table 4**

|         |                  |          |          |
|---------|------------------|----------|----------|
| ATF1    | Lomustine        | 0.280309 | 0.030061 |
| CREB3L1 | Simvastatin      | 0.279901 | 0.030312 |
| CREB3   | Sunitinib        | -0.27732 | 0.031937 |
| ATF1    | Chlorambucil     | 0.276698 | 0.03234  |
| CREB3L1 | Idelalisib       | 0.276311 | 0.032592 |
| CREB3   | Actinomycin D    | -0.27571 | 0.032985 |
| CREB3L1 | Osimertinib      | -0.27396 | 0.034164 |
| ATF1    | 6-Thioguanine    | 0.273513 | 0.034468 |
| CREB3   | Denileukin       | -0.27347 | 0.034499 |
| CREB3L1 | IPI-145          | 0.273324 | 0.034597 |
| CREB3L1 | Selumetinib      | -0.27053 | 0.036567 |
| ATF1    | Vemurafenib      | -0.27018 | 0.036818 |
| BATF    | Dabrafenib       | 0.266158 | 0.039828 |
| BATF    | TYROTHRI         | 0.2659   | 0.040028 |
| ATF4    | Vismodegib       | 0.265362 | 0.040448 |
| CREB3L1 | Oxaliplatin      | -0.26416 | 0.041403 |
| CREB3   | Imatinib         | -0.26414 | 0.041413 |
| ATF1    | Uracil mustard   | 0.264133 | 0.04142  |
| CREB1   | Melphalan        | 0.263588 | 0.041857 |
| BATF    | ABT-199          | 0.263528 | 0.041906 |
| BATF    | Dromostatin      | 0.263196 | 0.042174 |
| CREB1   | Uracil mustard   | 0.261993 | 0.043158 |
| CREB1   | Dexamethasone    | 0.261821 | 0.043301 |
| CREB3L1 | Bleomycin        | 0.26034  | 0.044543 |
| CREB3L1 | Dexrazoxane      | -0.25987 | 0.04494  |
| CREB3   | Depsipeptide     | -0.25888 | 0.045793 |
| BATF    | Simvastatin      | -0.25805 | 0.046519 |
| CREB1   | Idarubicin       | 0.257448 | 0.04705  |
| BATF    | Melphalan        | 0.257307 | 0.047176 |
| ATF4    | Axitinib         | 0.256629 | 0.047781 |
| CREB3   | Crizotinib       | -0.2565  | 0.047896 |
| BATF    | DAUNORUBICIN     | 0.256463 | 0.047931 |
| CREB3L1 | Vorinostat       | -0.25639 | 0.047992 |
| ATF1    | Oxaliplatin      | 0.255864 | 0.048472 |
| BATF    | Nitrogen mustard | 0.255601 | 0.048712 |
| CREB3L1 | ARRY-162         | -0.25516 | 0.049117 |
| ATF1    | Allopurinol      | 0.254437 | 0.049784 |

Supplementary table 4
